# Supplementary material
Source: PubMed Central journal article supplement (PMC4598058)

## Supporting Information

### Asymmetric Total Synthesis of the Indole Diterpene Alkaloid Paspaline

Robert J. Sharpe and Jeffrey S. Johnson\*

*Department of Chemistry, University of North Carolina at Chapel Hill, Chapel Hill, North Carolina  
27599-3290, United States*

[jsj@unc.edu](mailto:jsj@unc.edu)

#### Table of Contents

|                                                                  |                 |
|------------------------------------------------------------------|-----------------|
| Relevant crude <sup>1</sup> H NMR Spectra                        | <b>S2-S12</b>   |
| Comparison of Synthetic Sample with Literature Data              | <b>S13</b>      |
| Computation Analysis                                             | <b>S14-S18</b>  |
| X-Ray Crystallographic Data                                      | <b>S19-S21</b>  |
| <sup>1</sup> H, <sup>19</sup> F, and <sup>13</sup> C NMR Spectra | <b>S22-S102</b> |

### Crude <sup>1</sup>H NMR spectrum of 17

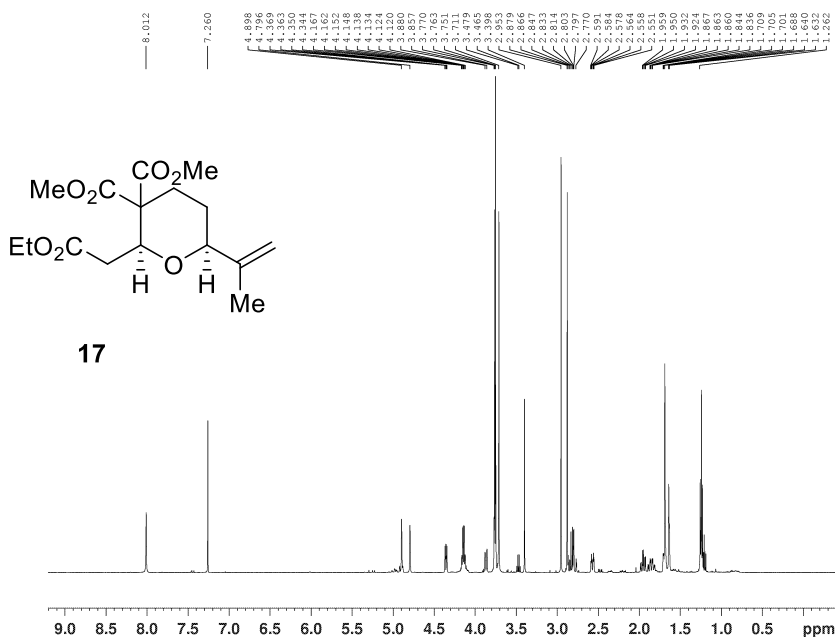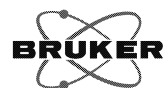

Current Data Parameters  
 NAME rjs-2484 Crude  
 EXPNO 1  
 PROCNO 1

F2 - Acquisition Parameter  
 Date\_ 20150304  
 Time 6.54  
 INSTRUM spect  
 PROBHD 5 mm PABBO BB-  
 PULPROG zg30  
 TD 65536  
 SOLVENT CDCl3  
 NS 20  
 DS 2  
 SWH 10000.000 Hz  
 FIDRES 0.152388 Hz  
 AQ 3.2767999 se  
 RG 201.39  
 DW 50.000 us  
 DE 6.50 us  
 TE 294.4 K  
 D1 1.0000000 se  
 TDO

===== CHANNEL f1 =====  
 SF01 500.130085 MH  
 NUC1 1H  
 P1 8.10 us  
 PLW1 38.99399948 W

F2 - Processing parameters  
 SI 65536  
 SF 500.1300118 MH  
 WDW EM  
 SSB 0  
 LB 0.30 Hz  
 GB 0  
 PC 1.00

### Crude <sup>1</sup>H NMR spectrum of 20

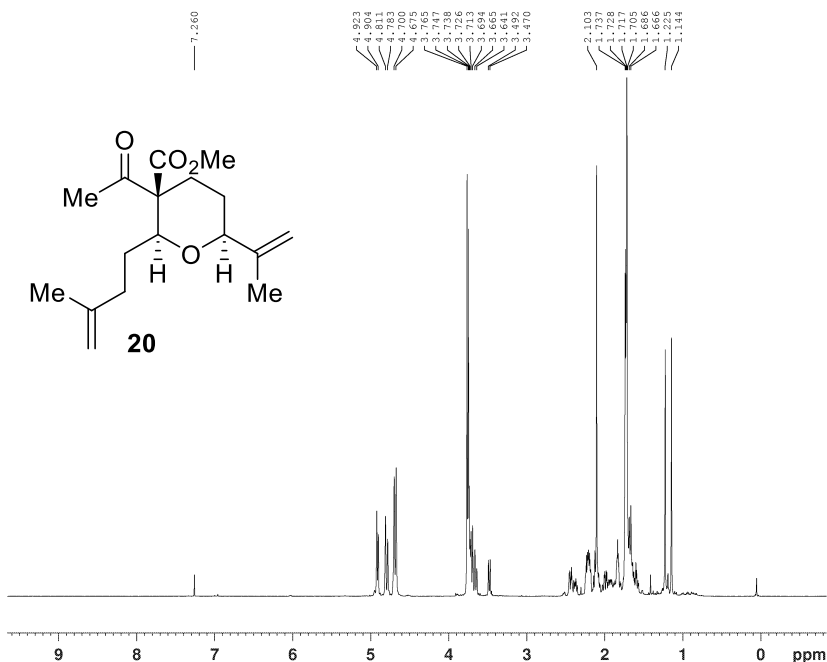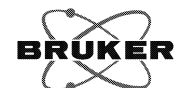

Current Data Parameters  
 NAME rjs-1228 Crude  
 EXPNO 1  
 PROCNO 1

F2 - Acquisition Parameter  
 Date\_ 20150317  
 Time 10.53  
 INSTRUM spect  
 PROBHD 5 mm PABBO BB-  
 PULPROG zg30  
 TD 65536  
 SOLVENT CDCl3  
 NS 12  
 DS 2  
 SWH 10000.000 Hz  
 FIDRES 0.152568 Hz  
 AQ 3.2767999 se  
 RG 79.57  
 DW 50.000 us  
 DE 6.50 us  
 TE 293.0 K  
 D1 1.0000000 se  
 TDO 1

===== CHANNEL f1 =====  
 SF01 500.130085 MH  
 NUC1 1H  
 P1 8.10 us  
 PLW1 38.99399948 W

F2 - Processing parameters  
 SI 65536  
 SF 500.1300111 MH  
 WDW EM  
 SSB 0  
 LB 0.30 Hz  
 GB 0  
 PC 1.00

### Crude <sup>1</sup>H NMR spectrum of S1

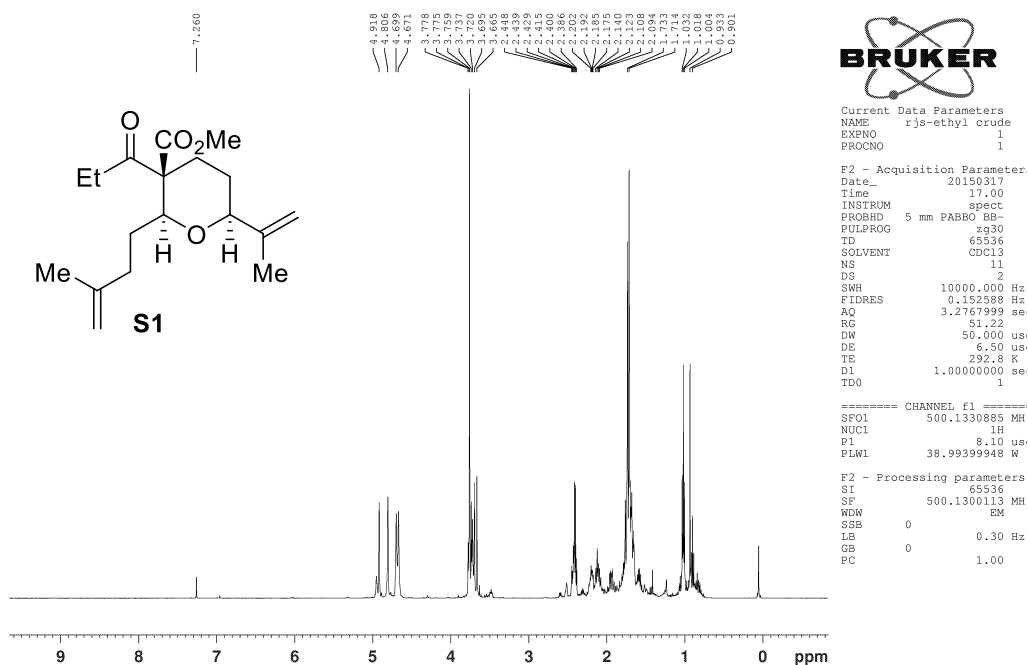

### Crude <sup>1</sup>H NMR spectrum of 24

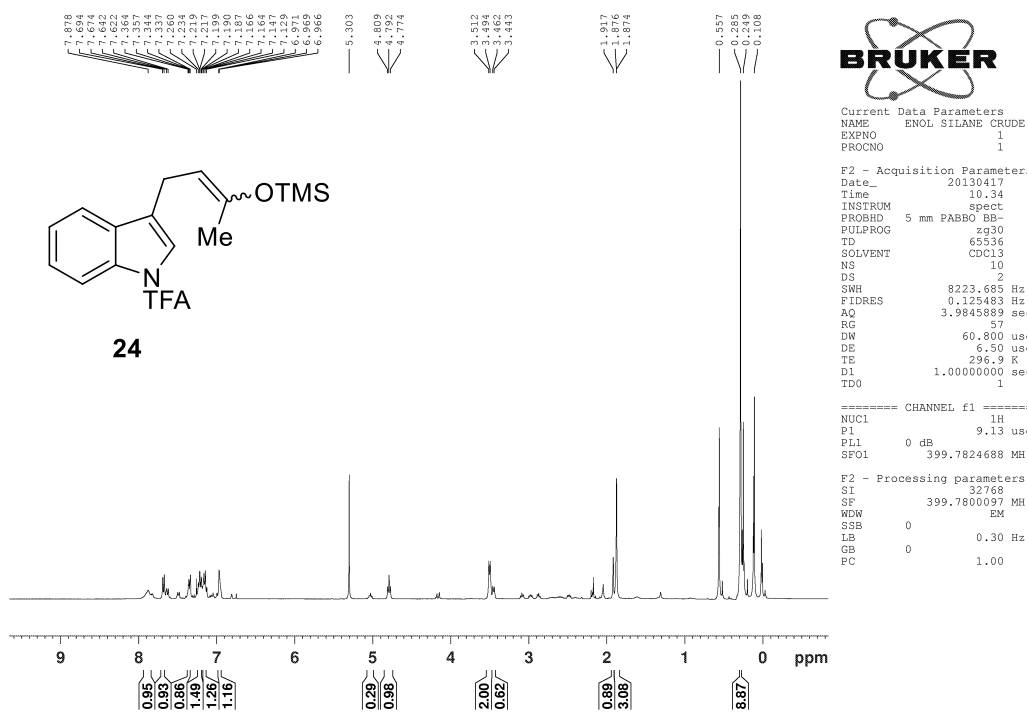

### Crude <sup>1</sup>H NMR Spectrum of 40

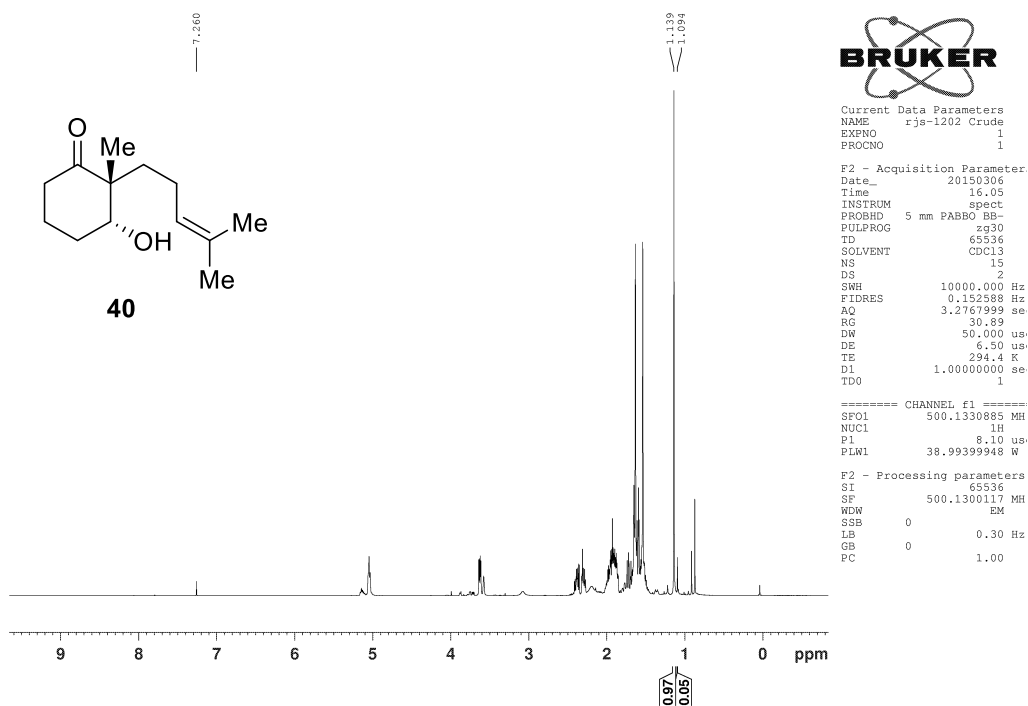

### Crude <sup>1</sup>H NMR spectrum of 36.

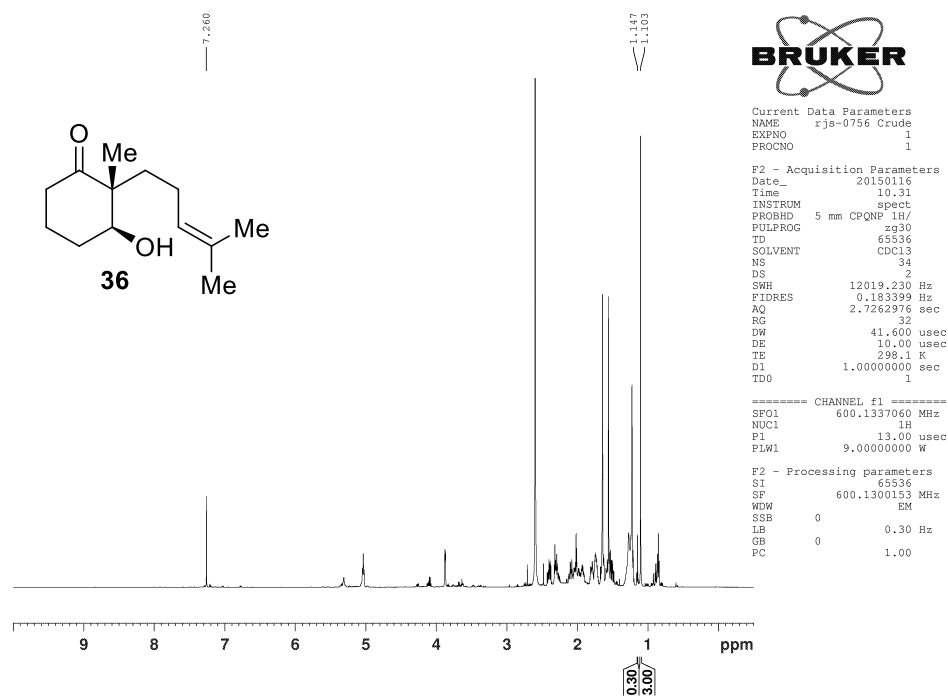

### Crude <sup>1</sup>H NMR spectrum of 41

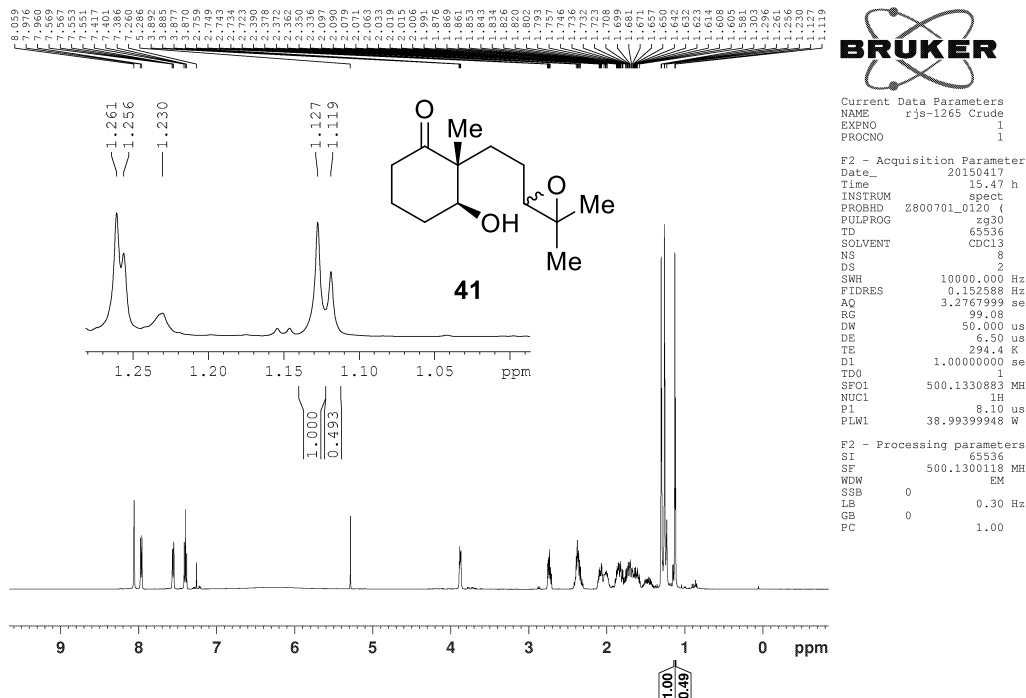

### Crude <sup>1</sup>H NMR spectrum of 42 and 43

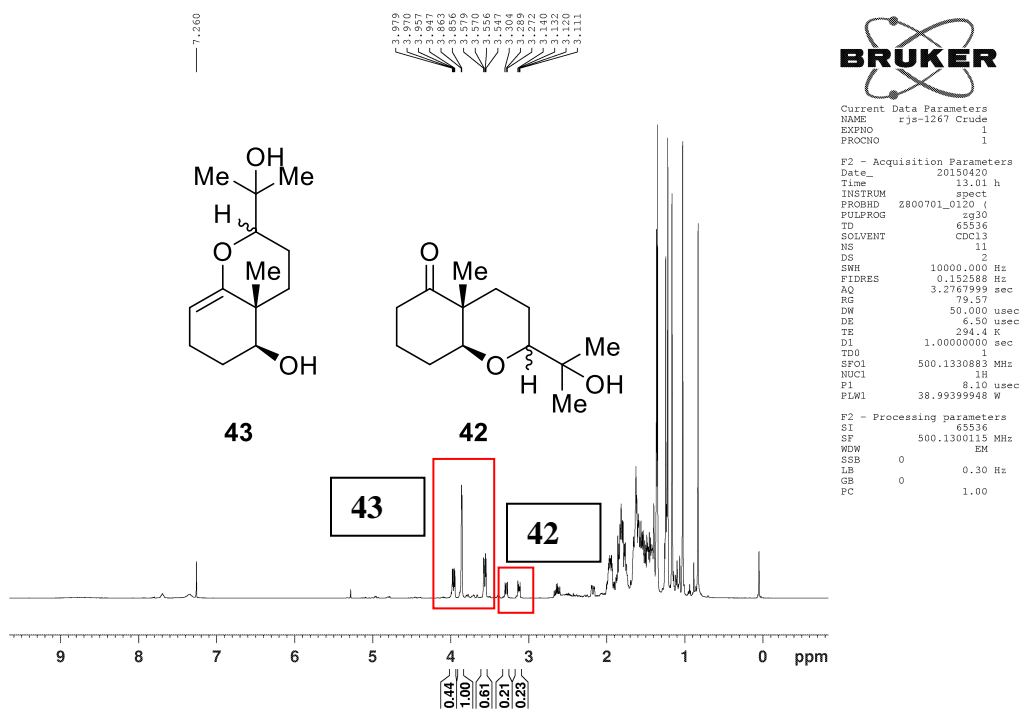

Crude <sup>1</sup>H NMR spectrum of 45.

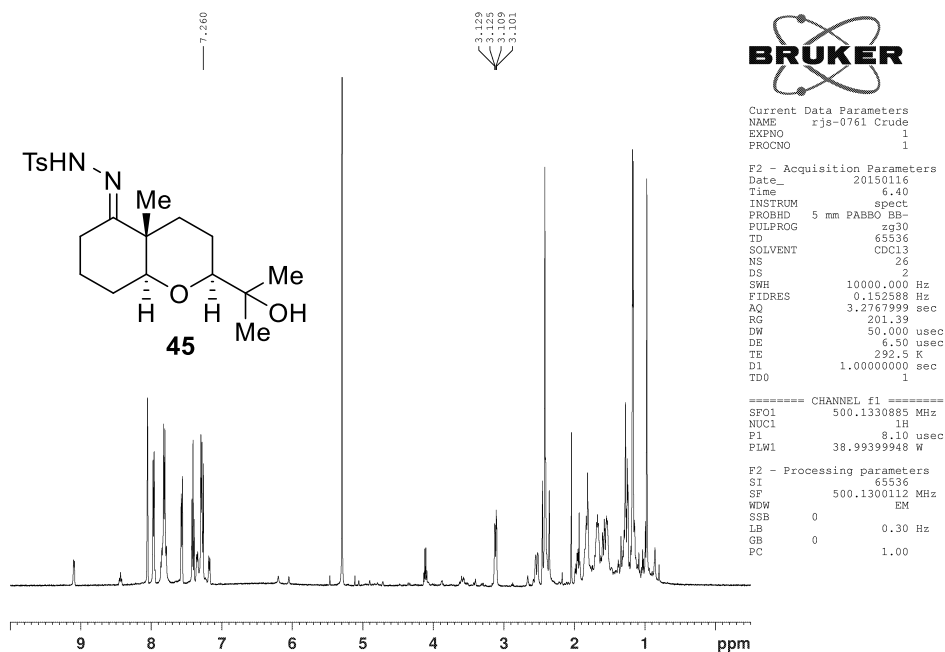

Crude <sup>1</sup>H NMR spectrum of 54

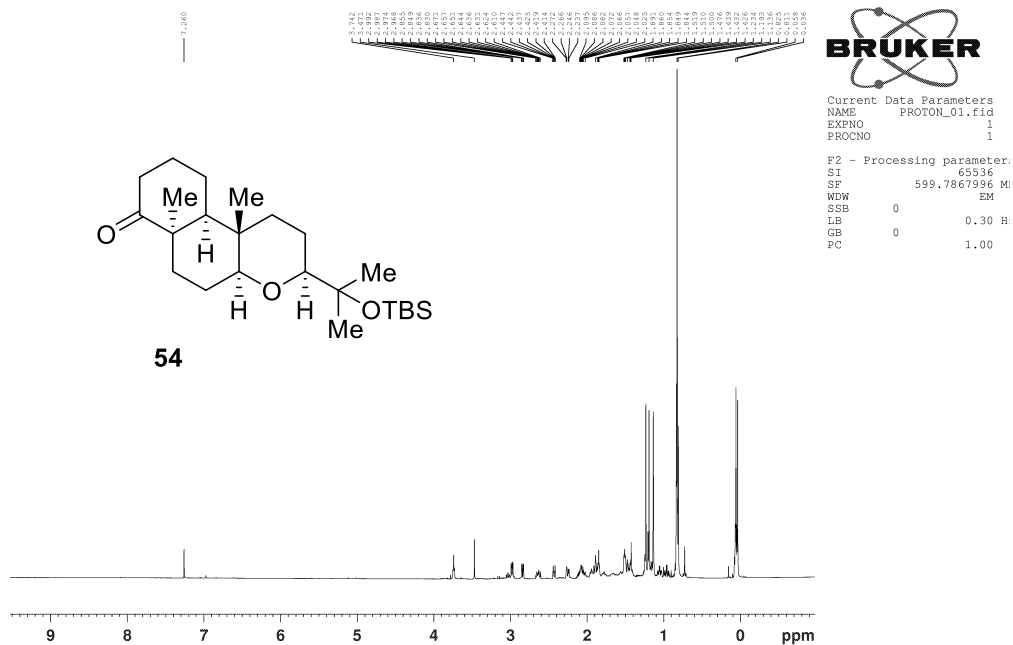

## Crude <sup>1</sup>H NMR spectrum of initial Birch reduction product 55 prior to epimerization

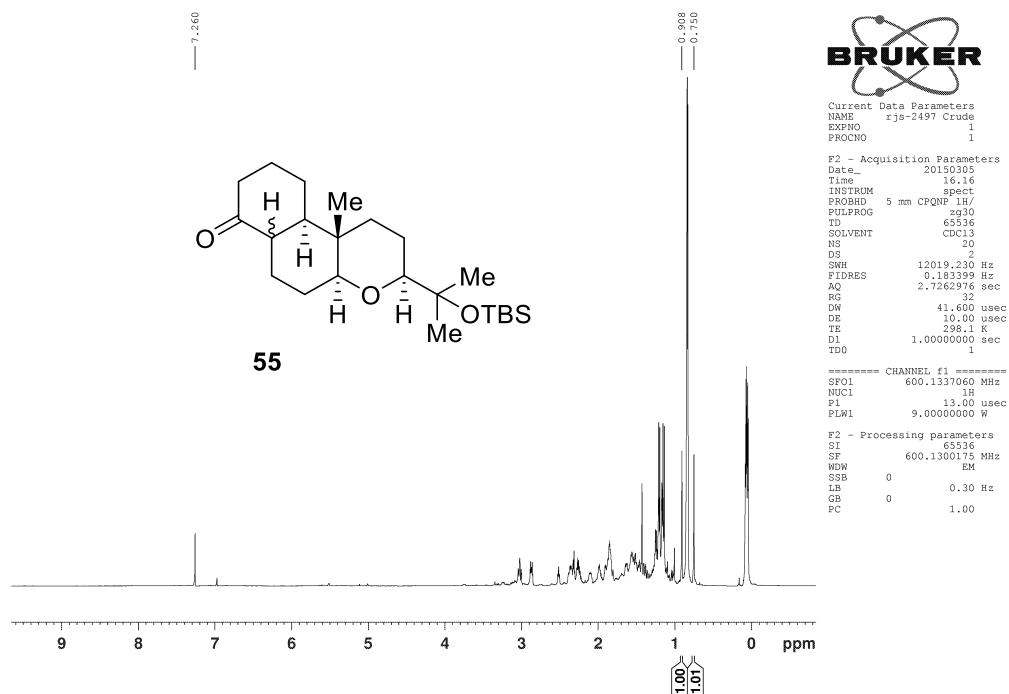

## Crude <sup>1</sup>H NMR spectrum of 55 after epimerization

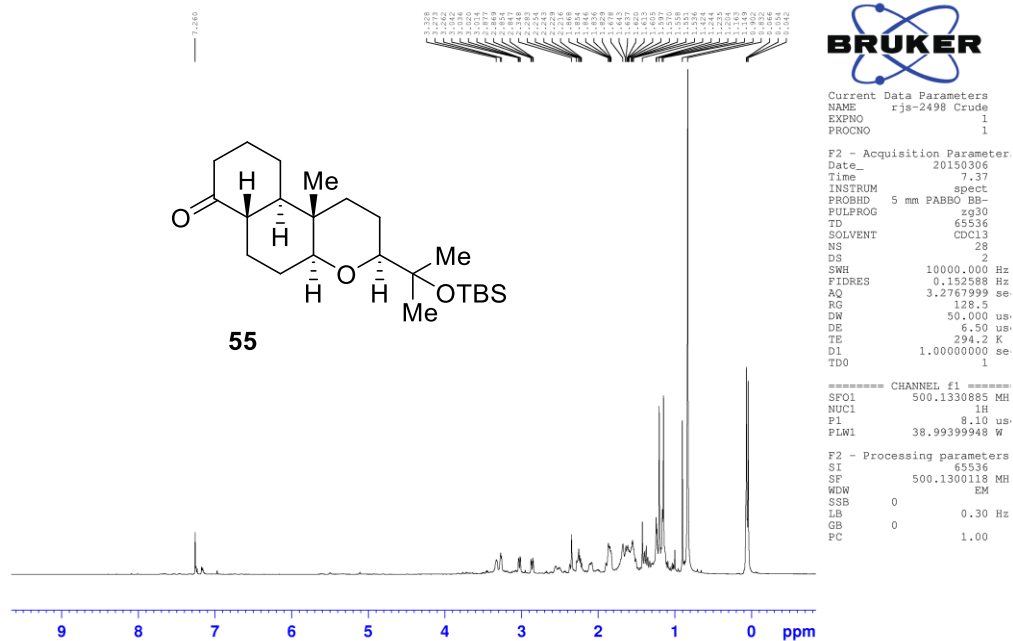

### Crude <sup>1</sup>H NMR spectrum of 56

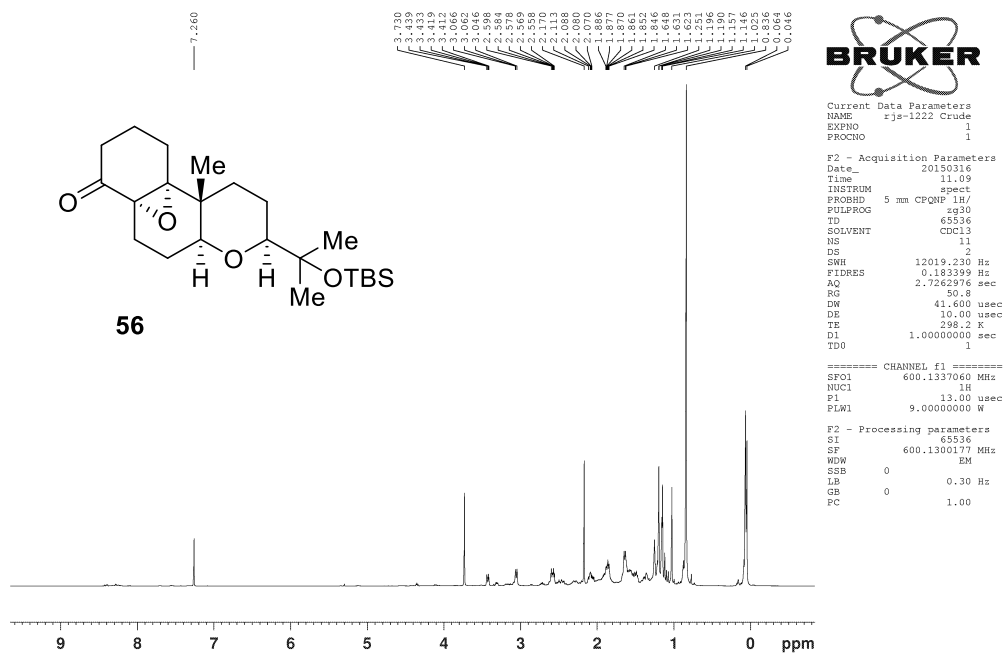

### Crude <sup>1</sup>H NMR spectrum of 57

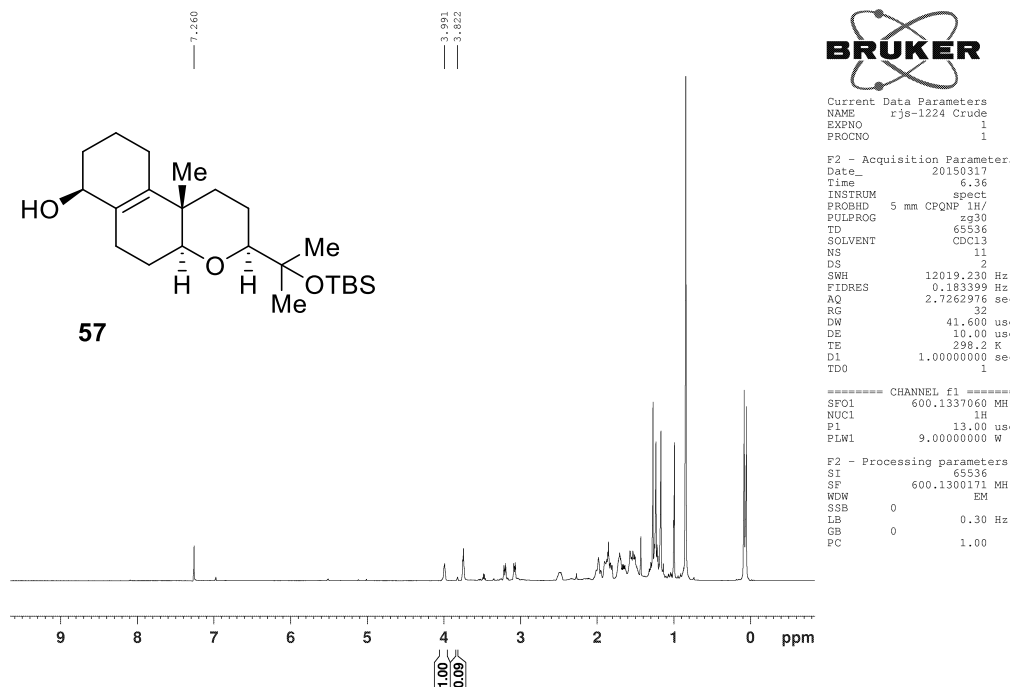



### Crude <sup>1</sup>H NMR spectrum of 71b

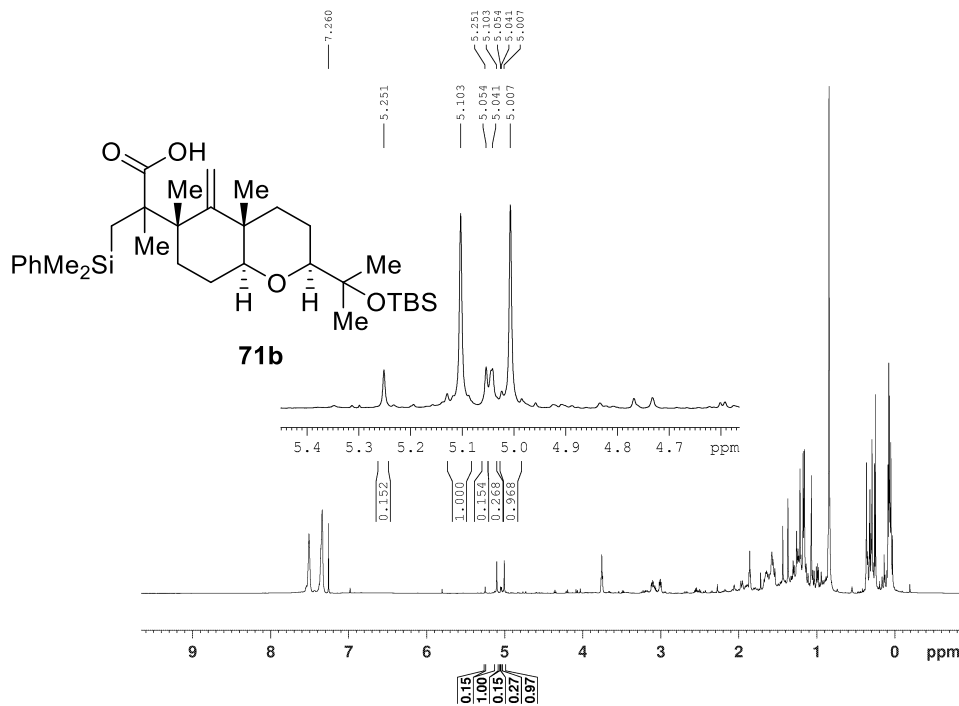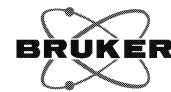

Current Data Parameters  
 NAME rjs-1242 Crude  
 EXPNO 1  
 PROCNO 1

F2 - Acquisition Parameter  
 Date\_ 20150324  
 Time 6.40  
 INSTRUM spect  
 PROBHD 5 mm CPQNP 1H/  
 PULPROG zg30  
 TD 65536  
 SOLVENT CDCl3  
 NS 15  
 DS 2  
 SWH 12019.230 Hz  
 FIDRES 0.183399 Hz  
 AQ 2.7262976 se  
 RG 32  
 DW 41.600 us  
 DE 10.00 us  
 TE 298.2 K  
 D1 1.00000000 se  
 TD0 1

==== CHANNEL f1 =====  
 SF01 600.1337060 MH  
 NUC1 1H  
 P1 13.00 us  
 PLW1 9.00000000 W

F2 - Processing parameters  
 SI 65536  
 SF 600.1300171 MH  
 WDW EM  
 SSB 0  
 LB 0.30 Hz  
 GB 0  
 PC 1.00

### Crude <sup>1</sup>H NMR spectrum of 71a

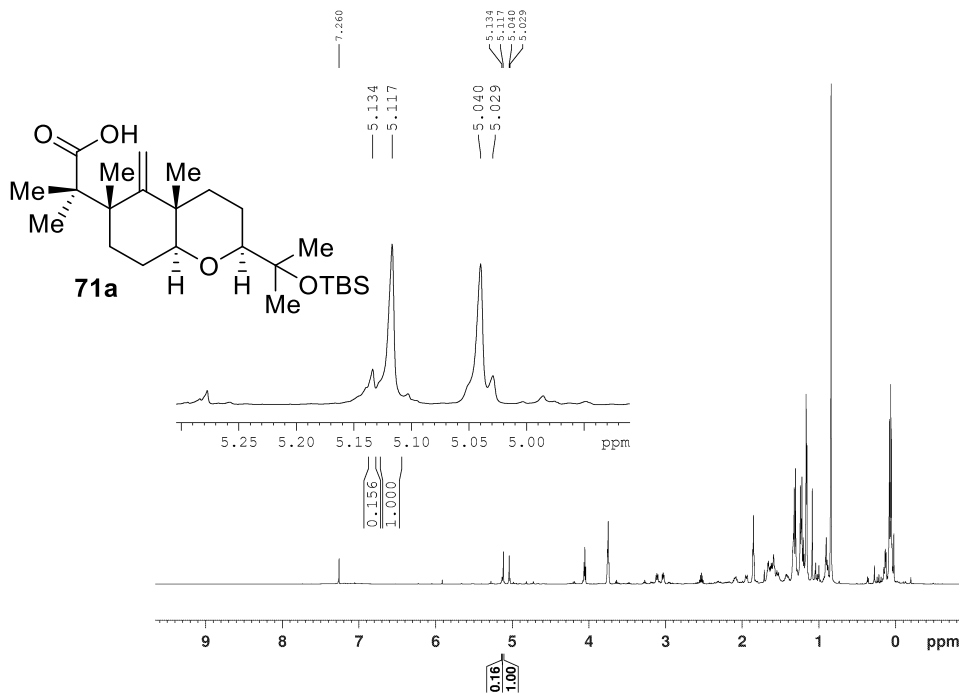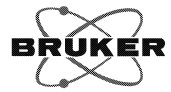

Current Data Parameters  
 NAME rjs-2417 Crude  
 EXPNO 1  
 PROCNO 1

F2 - Acquisition Parameter  
 Date\_ 20150210  
 Time 7.00  
 INSTRUM spect  
 PROBHD 5 mm CPQNP 1H/  
 PULPROG zg30  
 TD 65536  
 SOLVENT CDCl3  
 NS 37  
 DS 2  
 SWH 12019.230 Hz  
 FIDRES 0.183399 Hz  
 AQ 2.7262976 se  
 RG 22.6  
 DW 41.600 us  
 DE 10.00 us  
 TE 298.1 K  
 D1 1.00000000 se  
 TD0 1

==== CHANNEL f1 =====  
 SF01 600.1337060 MH  
 NUC1 1H  
 P1 13.00 us  
 PLW1 9.00000000 W

F2 - Processing parameters  
 SI 65536  
 SF 600.1300146 MH  
 WDW EM  
 SSB 0  
 LB 0.30 Hz  
 GB 0  
 PC 1.00



Crude <sup>1</sup>H NMR spectrum of 78.

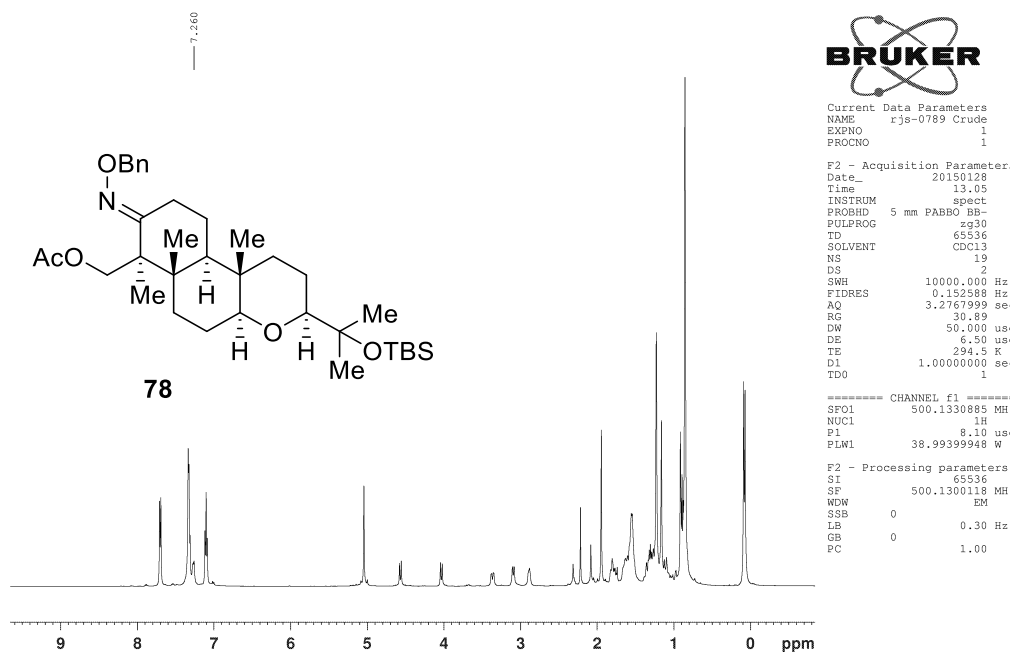

Crude <sup>1</sup>H NMR Spectrum of 87

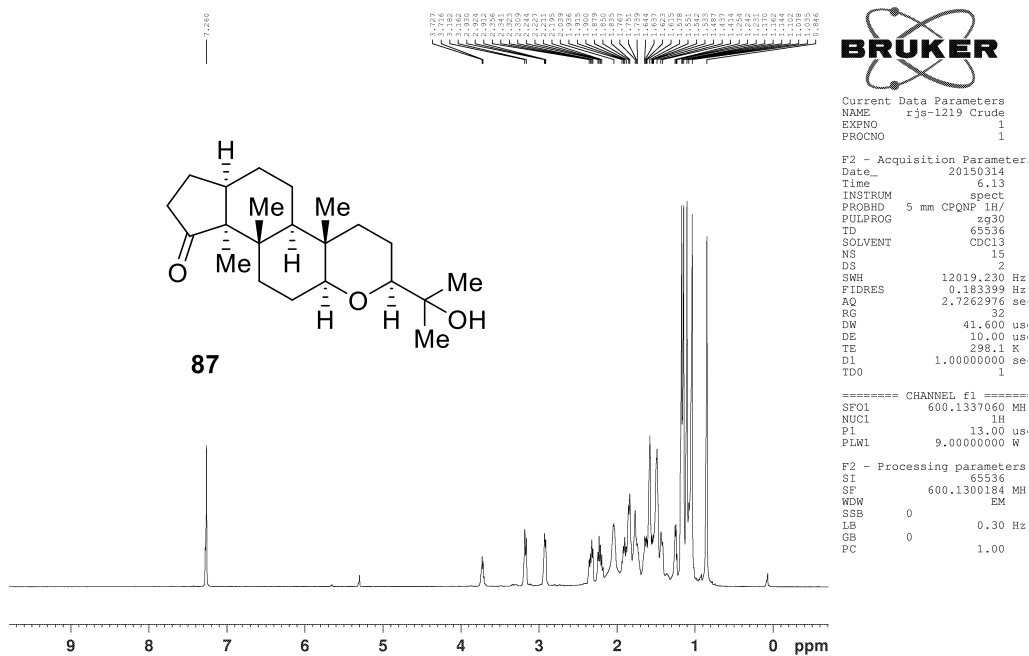

# Crude <sup>1</sup>H NMR spectrum of 88

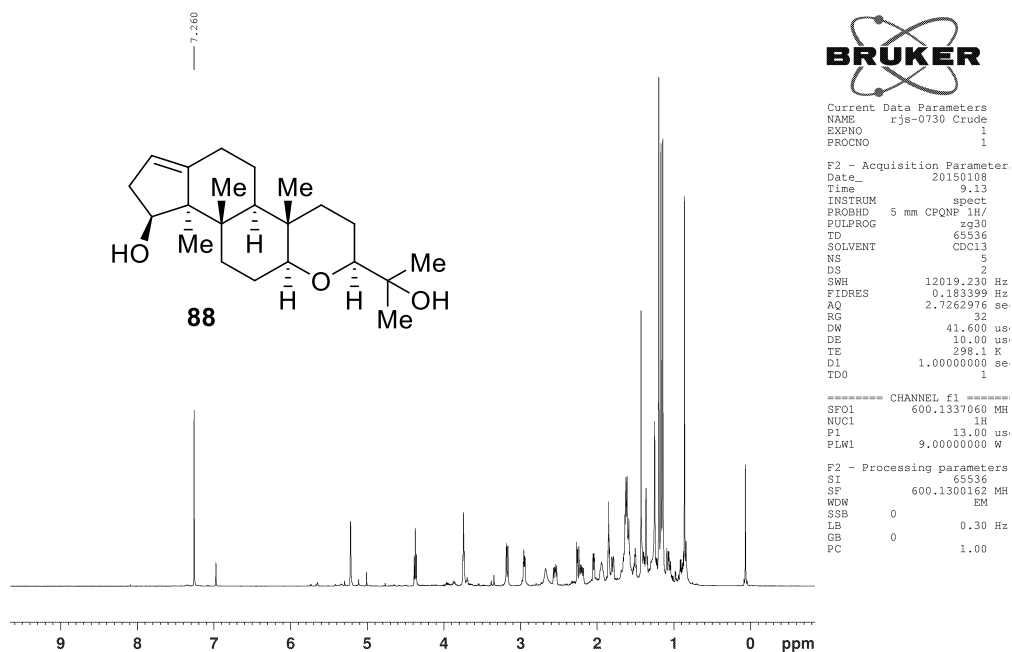

# Crude <sup>1</sup>H NMR spectrum of 90

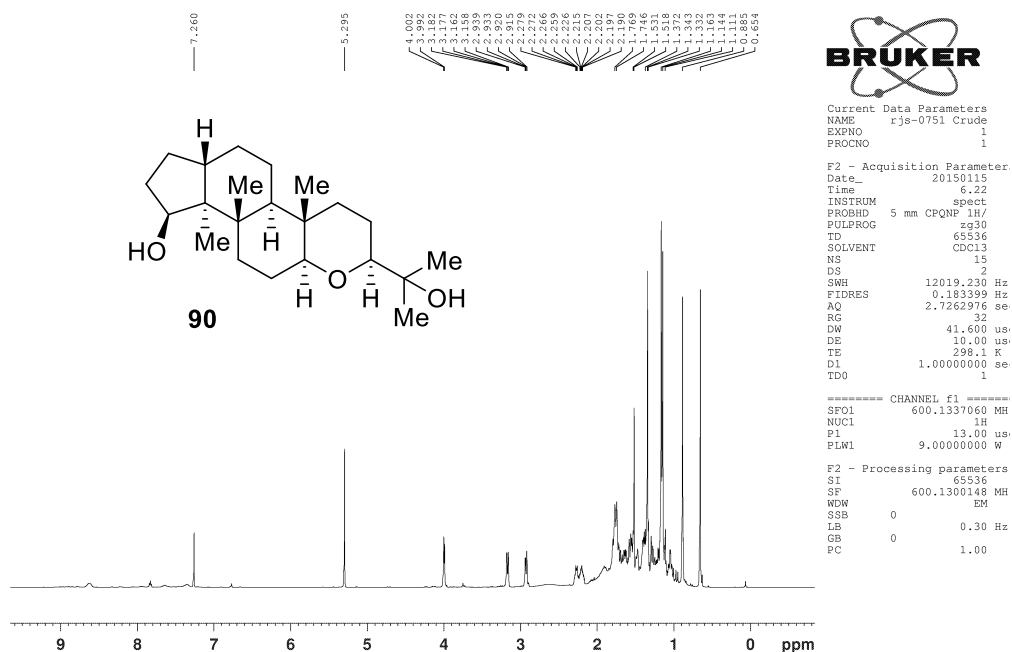

| Comparison of Reported Analytical Data for Paspaline |                                                                                                                                                                                                            |                                                                                                                                                                                                                                                                                                                                                                                              |                                                                                                                                                                                                                                                                                                                                                                                                                                     |
|------------------------------------------------------|------------------------------------------------------------------------------------------------------------------------------------------------------------------------------------------------------------|----------------------------------------------------------------------------------------------------------------------------------------------------------------------------------------------------------------------------------------------------------------------------------------------------------------------------------------------------------------------------------------------|-------------------------------------------------------------------------------------------------------------------------------------------------------------------------------------------------------------------------------------------------------------------------------------------------------------------------------------------------------------------------------------------------------------------------------------|
| Data Type                                            | Data Reported in Isolation Paper <sup>4</sup>                                                                                                                                                              | Data Reported by Smith and Coworkers <sup>12d</sup>                                                                                                                                                                                                                                                                                                                                          | Synthetic Paspaline                                                                                                                                                                                                                                                                                                                                                                                                                 |
| <sup>1</sup> H NMR (CDCl <sub>3</sub> )              | <sup>1</sup> H NMR (100 MHz, CDCl <sub>3</sub> )<br>7.82 (s, 1H)<br>7.0-7.5 (m, 4H)<br>3.68 (q, <i>J</i> = 2.5 Hz, 1H)<br>3.3-1.4 (m, 18H)<br>1.18 (s, 6H)<br>1.13 (s, 3H)<br>1.02 (s, 3H)<br>0.88 (s, 3H) | <sup>1</sup> H NMR (250 MHz, CDCl <sub>3</sub> )<br>7.74 (br s, 1H)<br>7.44-7.40 (m, 1H)<br>7.31-7.26 (m, 1H)<br>7.09-7.06 (m, 2H)<br>3.21 (dd, <i>J</i> = 11.8, 3.0 Hz, 1H)<br>3.03 (dd, <i>J</i> = 11.3, 4.2 Hz, 1H)<br>2.85-2.62 (m, 3H)<br>2.32 (dd, <i>J</i> = 12.7, 10.4 Hz, 1H)<br>2.04-1.25 (m, 13H)<br>1.19 (s, 3H)<br>1.17 (s, 3H)<br>1.13 (s, 3H)<br>1.02 (s, 3H)<br>0.88 (s, 3H) | <sup>1</sup> H NMR (600 MHz, CDCl <sub>3</sub> )<br>7.72 (br s, 1H)<br>7.42 (m, 1H)<br>7.30 (m, 1H)<br>7.07 (m, 2H)<br>3.21 (dd, <i>J</i> = 9.6, 2.4 Hz, 1H)<br>3.03 (dd, <i>J</i> = 8.4, 3.6 Hz, 1H)<br>2.77-2.65 (m, 3H)<br>2.32 (dd, <i>J</i> = 10.8, 2.4 Hz, 1H)<br>1.96 (m, 1H)<br>1.84-1.77 (m, 3H)<br>1.70-1.56 (m, 6H)<br>1.49-1.37 (m, 3H)<br>1.19 (s, 3H)<br>1.17 (s, 3H)<br>1.13 (s, 3H)<br>1.03 (s, 3H)<br>0.88 (s, 3H) |
| <sup>13</sup> C NMR (CDCl <sub>3</sub> )             | NA                                                                                                                                                                                                         | NA                                                                                                                                                                                                                                                                                                                                                                                           | <sup>13</sup> C NMR (150 MHz, CDCl <sub>3</sub> )<br>150.8, 139.3, 125.1, 120.4,<br>119.5, 118.4, 118.2, 111.4,<br>85.7, 84.7, 71.9, 53.0, 48.7,<br>46.4, 40.0, 37.6, 36.5, 33.9,<br>27.5, 26.1, 25.2, 24.6, 23.7,<br>22.0, 21.9, 20.0, 14.6, 12.6                                                                                                                                                                                  |
| Rotation                                             | -23.0 ( <i>c</i> = 0.36, CHCl <sub>3</sub> )                                                                                                                                                               | -42.2 ( <i>c</i> = 0.64, C <sub>6</sub> H <sub>6</sub> )                                                                                                                                                                                                                                                                                                                                     | -16.4 ( <i>c</i> = 0.30, CHCl <sub>3</sub> )                                                                                                                                                                                                                                                                                                                                                                                        |
| IR                                                   | 3500, 3450, 2950, 2850,<br>1440, 1380, 1360, 1320,<br>1280, 1150, 1090, 1030,<br>1010, 970, 940, 895, 875                                                                                                  | 3550, 3470, 3320, 2980, 2950,<br>2850, 1450, 1385, 1375, 1330,<br>1300, 1260, 1240, 1160, 1090,<br>1035                                                                                                                                                                                                                                                                                      | 3565, 3467, 3053, 2982, 2930,<br>2855, 1455, 1386, 1375, 1331,<br>1265, 1158, 1087, 1037                                                                                                                                                                                                                                                                                                                                            |
| MS                                                   | NA                                                                                                                                                                                                         | <i>m/z</i> 421.2997 (M <sup>+</sup> , calcd for C <sub>28</sub> H <sub>39</sub> NO <sub>2</sub> , 421.3013)                                                                                                                                                                                                                                                                                  | 422.3056 (Calcd. For C <sub>28</sub> H <sub>39</sub> NO <sub>2</sub> +H, 422.3059)                                                                                                                                                                                                                                                                                                                                                  |

## Computational Details:

Hydroxyketone **36**:

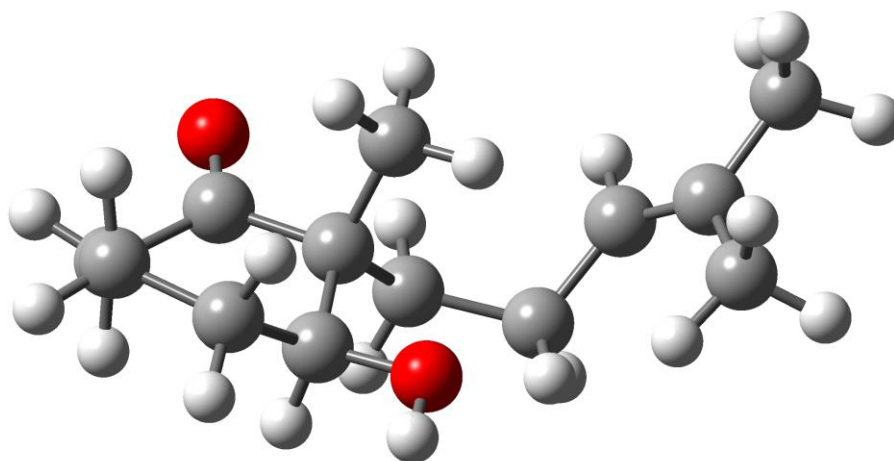

## Cartesian Coordinates:

|   |          |          |          |
|---|----------|----------|----------|
| C | 0.38546  | 0.90879  | -0.16849 |
| C | 1.73413  | 1.58994  | -0.51067 |
| C | 2.09875  | 2.70065  | 0.48898  |
| C | 0.95795  | 3.68809  | 0.66408  |
| C | -0.46509 | 3.10881  | 0.89226  |
| C | -0.37068 | 1.56788  | 0.99805  |
| H | -0.27802 | 0.90915  | -1.03680 |
| H | 2.54204  | 0.85495  | -0.54461 |
| H | 2.32003  | 2.26173  | 1.47108  |
| H | 0.15664  | 1.33392  | 1.93552  |
| H | 0.54620  | -0.14523 | 0.08789  |
| H | 1.68471  | 2.02809  | -1.51165 |
| H | 2.98467  | 3.25643  | 0.17773  |
| O | -1.69458 | 1.02910  | 1.07655  |
| H | -1.62408 | 0.06885  | 1.12912  |
| C | -1.31718 | 3.53868  | -0.32139 |
| H | -2.32521 | 3.13649  | -0.25078 |
| H | -1.37610 | 4.62651  | -0.36428 |
| H | -0.87890 | 3.19469  | -1.26323 |
| C | -0.96615 | 3.74892  | 2.22176  |
| H | -0.31676 | 3.37774  | 3.02538  |
| H | -0.76610 | 4.82177  | 2.15141  |
| C | -2.43226 | 3.53603  | 2.66052  |
| H | -2.69977 | 2.48553  | 2.57142  |
| H | -2.46197 | 3.76933  | 3.73511  |
| C | -3.43397 | 4.43288  | 1.98289  |
| H | -3.15545 | 5.48818  | 1.97574  |

|   |          |         |          |
|---|----------|---------|----------|
| C | -4.61612 | 4.11033 | 1.44553  |
| C | -5.16718 | 2.70863 | 1.36389  |
| H | -4.43947 | 1.94478 | 1.63475  |
| H | -6.04066 | 2.59306 | 2.01783  |
| H | -5.51464 | 2.49005 | 0.34719  |
| C | -5.51843 | 5.17125 | 0.86394  |
| H | -5.09080 | 6.17157 | 0.95968  |
| H | -5.71319 | 4.98733 | -0.19991 |
| H | -6.49723 | 5.17512 | 1.35944  |
| O | 1.13979  | 4.88331 | 0.61255  |

Hydrazone **44**:

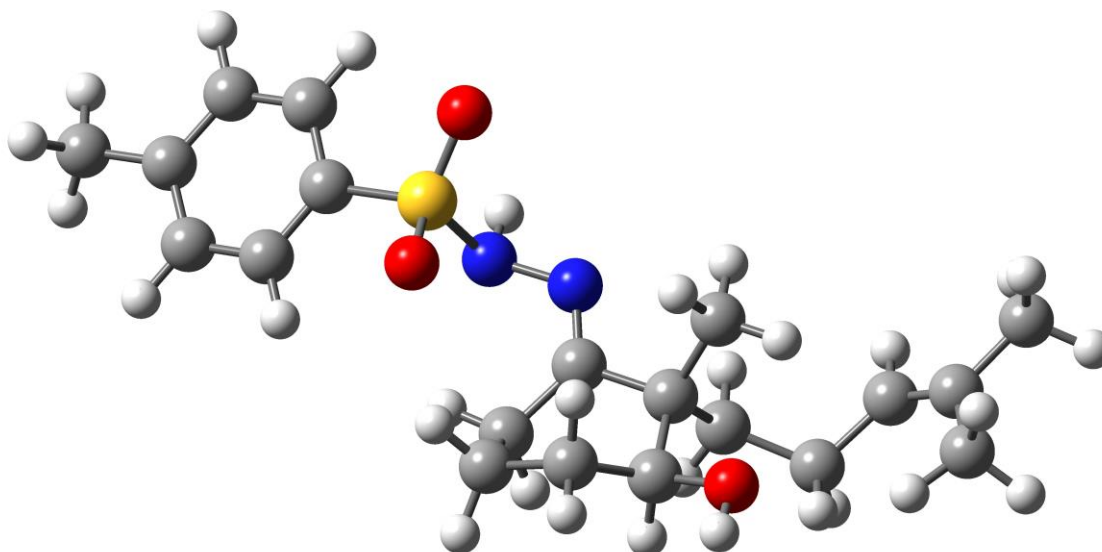

**Cartesian Coordinates:**

|   |          |          |          |
|---|----------|----------|----------|
| C | -1.58706 | 2.68188  | 0.87646  |
| C | -0.26743 | 2.85482  | 0.09964  |
| C | -0.04916 | 1.69871  | -0.90540 |
| C | -0.67128 | 0.41977  | -0.41063 |
| C | -2.20054 | 0.44181  | -0.20137 |
| C | -2.62780 | 1.92617  | 0.04540  |
| H | -1.41458 | 2.13073  | 1.80567  |
| H | -0.26724 | 3.80193  | -0.44877 |
| H | -0.55088 | 1.94371  | -1.84972 |
| N | -0.08880 | -0.69814 | -0.19218 |
| H | -2.72316 | 2.42606  | -0.93155 |
| H | -1.98677 | 3.66081  | 1.16687  |
| H | 0.56884  | 2.88083  | 0.79751  |
| H | 1.00408  | 1.55438  | -1.13081 |
| O | -3.90730 | 1.92929  | 0.68252  |
| H | -4.13426 | 2.84425  | 0.88421  |
| C | -2.58511 | -0.44670 | 0.99533  |
| H | -3.65727 | -0.42029 | 1.16701  |

|   |          |          |          |
|---|----------|----------|----------|
| H | -2.27775 | -1.47461 | 0.80986  |
| H | -2.08240 | -0.11640 | 1.90739  |
| C | -2.80907 | -0.09244 | -1.53598 |
| H | -2.41954 | 0.52858  | -2.35224 |
| H | -2.40338 | -1.09527 | -1.70547 |
| C | -4.35010 | -0.13512 | -1.66636 |
| H | -4.78697 | 0.77535  | -1.25720 |
| H | -4.57100 | -0.12038 | -2.74339 |
| C | -4.99829 | -1.36812 | -1.09466 |
| H | -4.55510 | -2.30310 | -1.44195 |
| C | -6.05066 | -1.46034 | -0.27384 |
| C | -6.78810 | -0.28226 | 0.31161  |
| H | -6.26749 | 0.66279  | 0.16612  |
| H | -7.79241 | -0.19426 | -0.12177 |
| H | -6.92899 | -0.41666 | 1.39031  |
| C | -6.59302 | -2.80687 | 0.13876  |
| H | -6.04798 | -3.62999 | -0.32832 |
| H | -6.53780 | -2.93926 | 1.22616  |
| H | -7.65164 | -2.90790 | -0.13090 |
| N | 1.33908  | -0.70447 | -0.44238 |
| H | 1.54340  | -1.66076 | -0.72908 |
| S | 2.24863  | -0.47532 | 1.02527  |
| O | 2.16207  | -1.63675 | 1.90726  |
| O | 1.88407  | 0.85262  | 1.51069  |
| C | 3.90198  | -0.42842 | 0.33162  |
| C | 4.36514  | 0.74097  | -0.27035 |
| C | 4.70968  | -1.55737 | 0.42501  |
| C | 5.65236  | 0.76723  | -0.78926 |
| H | 3.73039  | 1.61762  | -0.31480 |
| C | 5.99748  | -1.51255 | -0.10374 |
| H | 4.33972  | -2.44706 | 0.92043  |
| C | 6.48829  | -0.35626 | -0.71654 |
| H | 6.01827  | 1.67703  | -1.25591 |
| H | 6.63084  | -2.39116 | -0.03010 |
| C | 7.89322  | -0.29966 | -1.26135 |
| H | 7.92711  | 0.20612  | -2.22970 |
| H | 8.55218  | 0.25497  | -0.58500 |
| H | 8.31797  | -1.29730 | -1.38716 |



Non-conjugated enone **86**:

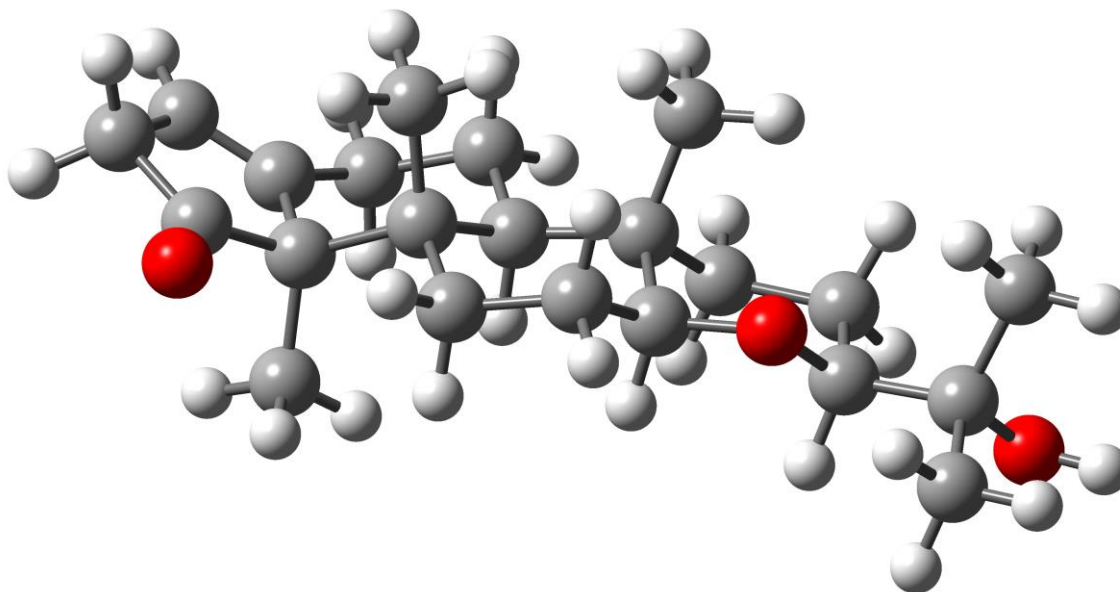

**Cartesian Coordinates**

|   |          |          |          |
|---|----------|----------|----------|
| C | 3.07284  | 0.27646  | -0.57012 |
| C | 3.67799  | -1.09995 | -0.33412 |
| C | 2.82409  | -2.30537 | -0.56760 |
| C | 1.47793  | -2.15739 | 0.16950  |
| C | 0.80618  | -0.80269 | -0.13254 |
| C | 1.72693  | 0.41724  | 0.27484  |
| C | 4.21018  | 1.21207  | -0.08036 |
| C | 5.41555  | 0.36053  | 0.33604  |
| C | 4.92366  | -1.04576 | 0.14466  |
| H | 2.62477  | -2.41512 | -1.64246 |
| H | 0.82104  | -2.97698 | -0.13199 |
| H | 0.73412  | -0.74313 | -1.22617 |
| H | 5.70226  | 0.59584  | 1.36860  |
| H | 5.52141  | -1.91755 | 0.39349  |
| O | 4.17409  | 2.41729  | -0.07150 |
| C | 2.91393  | 0.56961  | -2.08321 |
| H | 2.75595  | 1.63443  | -2.25701 |
| H | 3.82477  | 0.28111  | -2.61522 |
| H | 2.08759  | 0.01976  | -2.53660 |
| H | 6.28146  | 0.62548  | -0.28390 |
| H | 3.34239  | -3.21635 | -0.25215 |
| H | 1.64100  | -2.27515 | 1.24426  |
| C | 1.00547  | 1.74995  | -0.04230 |
| H | 0.93855  | 1.88386  | -1.12596 |
| H | 1.60610  | 2.58474  | 0.32521  |
| C | -0.42441 | 1.81937  | 0.51441  |
| H | -0.44392 | 1.79995  | 1.60776  |
| H | -0.89268 | 2.76195  | 0.21509  |
| C | -1.23133 | 0.66890  | -0.06110 |

|   |          |          |          |
|---|----------|----------|----------|
| H | -1.15200 | 0.74081  | -1.16054 |
| C | -0.69253 | -0.73173 | 0.33044  |
| C | 2.11980  | 0.42486  | 1.77160  |
| H | 2.60874  | -0.49707 | 2.08817  |
| H | 2.80969  | 1.24781  | 1.97288  |
| H | 1.26545  | 0.58321  | 2.42481  |
| C | -0.90465 | -1.03070 | 1.82758  |
| H | -1.95909 | -0.95628 | 2.09040  |
| H | -0.57522 | -2.04465 | 2.06940  |
| H | -0.37254 | -0.35049 | 2.48794  |
| C | -1.55277 | -1.73700 | -0.48978 |
| H | -1.31115 | -2.76954 | -0.22074 |
| H | -1.30244 | -1.62837 | -1.55333 |
| C | -3.43755 | -0.04404 | -0.51492 |
| H | -3.27105 | 0.19837  | -1.57742 |
| C | -3.06526 | -1.51414 | -0.30503 |
| H | -3.62686 | -2.12459 | -1.01516 |
| H | -3.36993 | -1.84061 | 0.69223  |
| O | -2.60900 | 0.81362  | 0.27362  |
| C | -4.90694 | 0.32004  | -0.21075 |
| C | -5.27818 | 0.11287  | 1.26157  |
| H | -4.64112 | 0.70998  | 1.91633  |
| H | -6.31667 | 0.41625  | 1.43321  |
| H | -5.19000 | -0.93663 | 1.54651  |
| C | -5.18335 | 1.76711  | -0.63434 |
| H | -4.96940 | 1.89756  | -1.69806 |
| H | -6.23639 | 2.02016  | -0.46755 |
| H | -4.57178 | 2.46974  | -0.06681 |
| O | -5.65932 | -0.57938 | -1.04410 |
| H | -6.59468 | -0.37199 | -0.93630 |

**X-ray Crystallographic Data:** Suitable single crystals of compounds **1**, **32**, **54**, and **91** were selected and analyzed on a Bruker APEX-II CCD<sup>1</sup> diffractometer. Crystals were kept at 100 K during data collection. Using Olex2,<sup>1</sup> structures were solved with the olex2.solve<sup>2</sup> structure solution program using Charge Flipping and refined with the XL<sup>3</sup> refinement package using Least Squares minimization. Thermal ellipsoid plots of these structures are included below.

1. Dolomanov, O. V.; Bourhis, L. J.; Gildea, R. J.; Howard, J. A. K.; Puschmann, H. *J. Appl. Cryst.* **2009**, *42*, 339.
2. Bourhis, L. J.; Dolomanov, O. V.; Gildea, R. J.; Howard, J. A. K.; Puschmann, H. *Acta Cryst.* **2015**, *A71*, 59.
3. Sheldrick, G. M. *Acta Cryst.* **2008**, *A64*, 112.

**Compound 32 (x1504008) (plotted at 50% ellipsoid contour percent probability)**

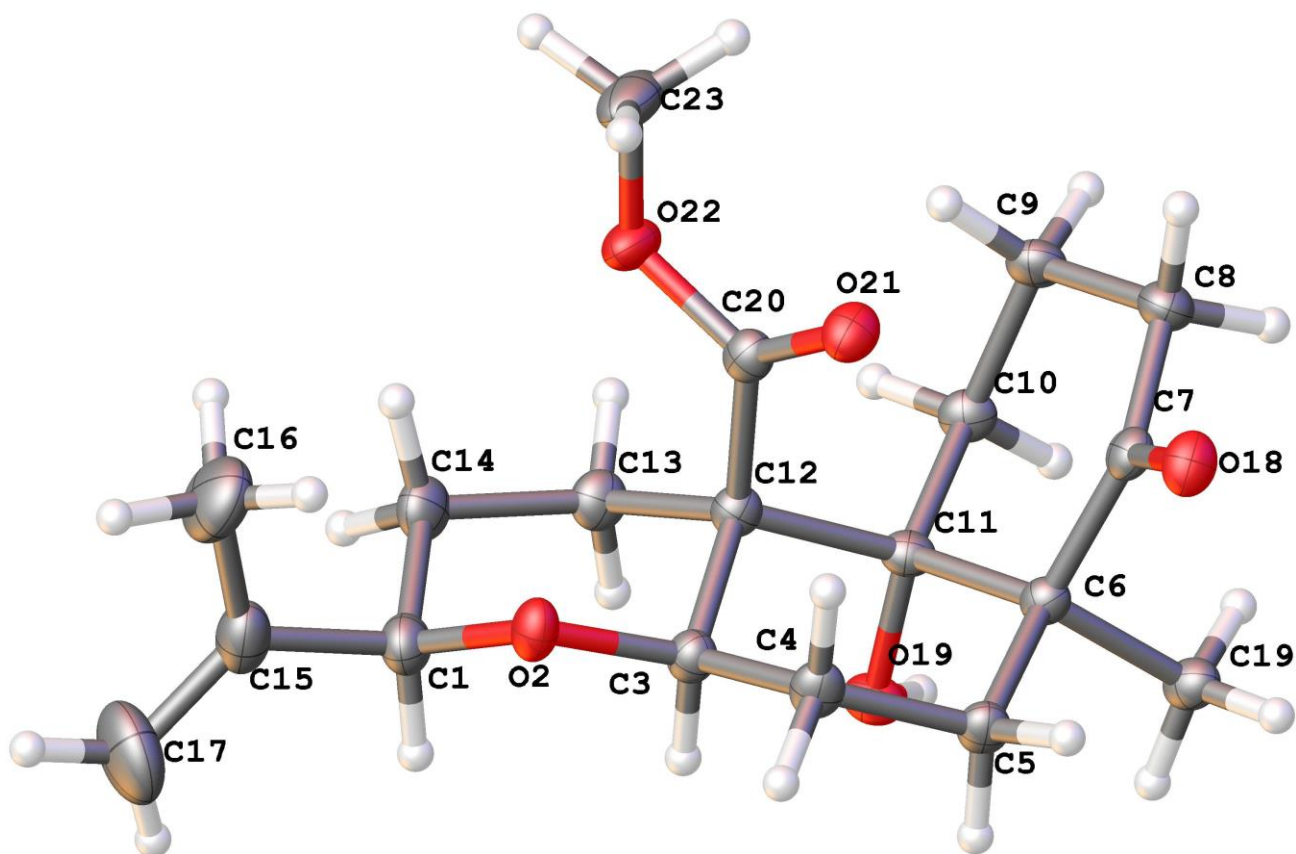

Compound 54 (x1405008) (plotted at 50% ellipsoid contour percent probability)

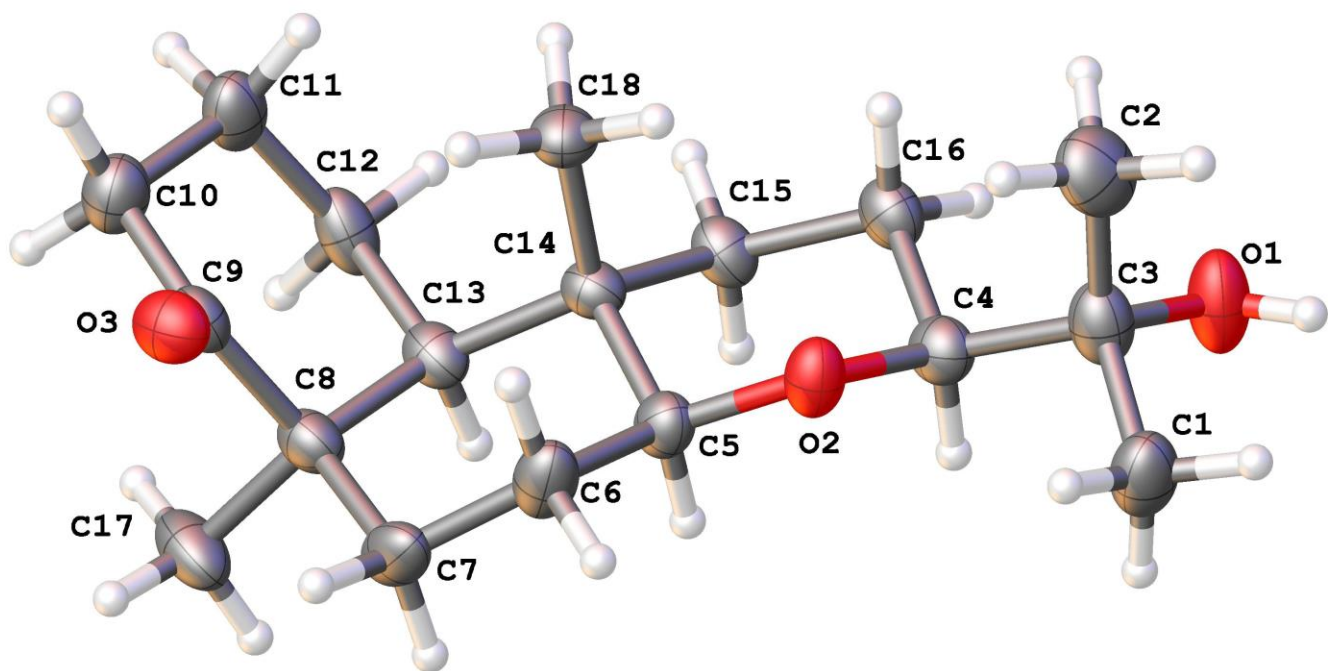

Compound 91 (x1501005) (plotted at 50% ellipsoid contour percent probability)

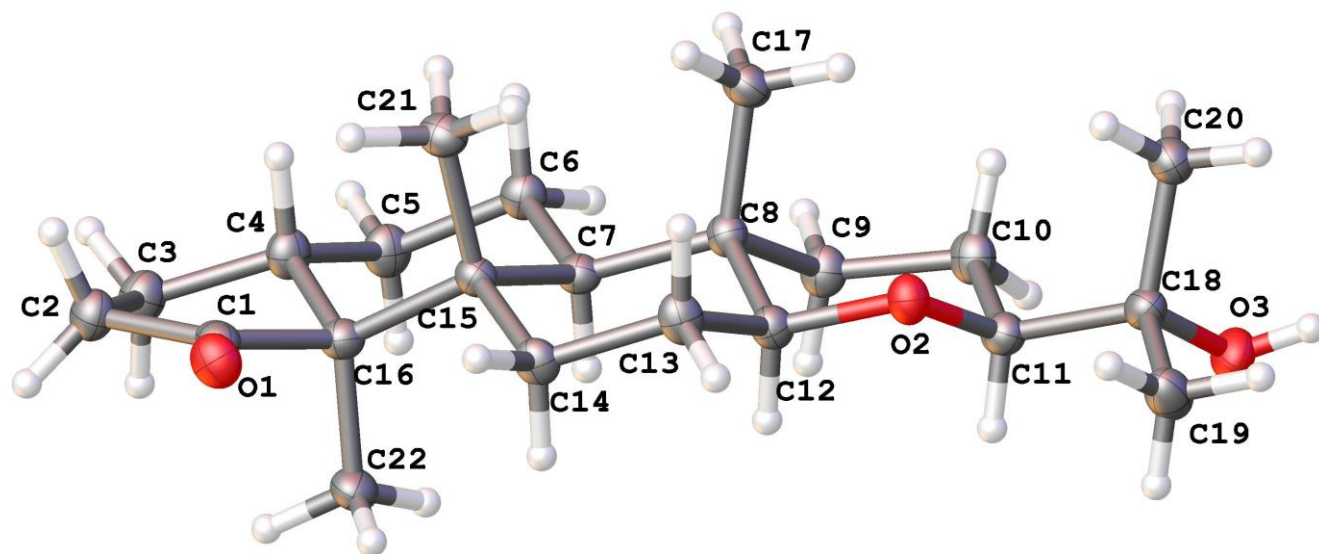

Compound 1 (x1502014) (paspaline) (plotted at 50% ellipsoid contour percent probability)

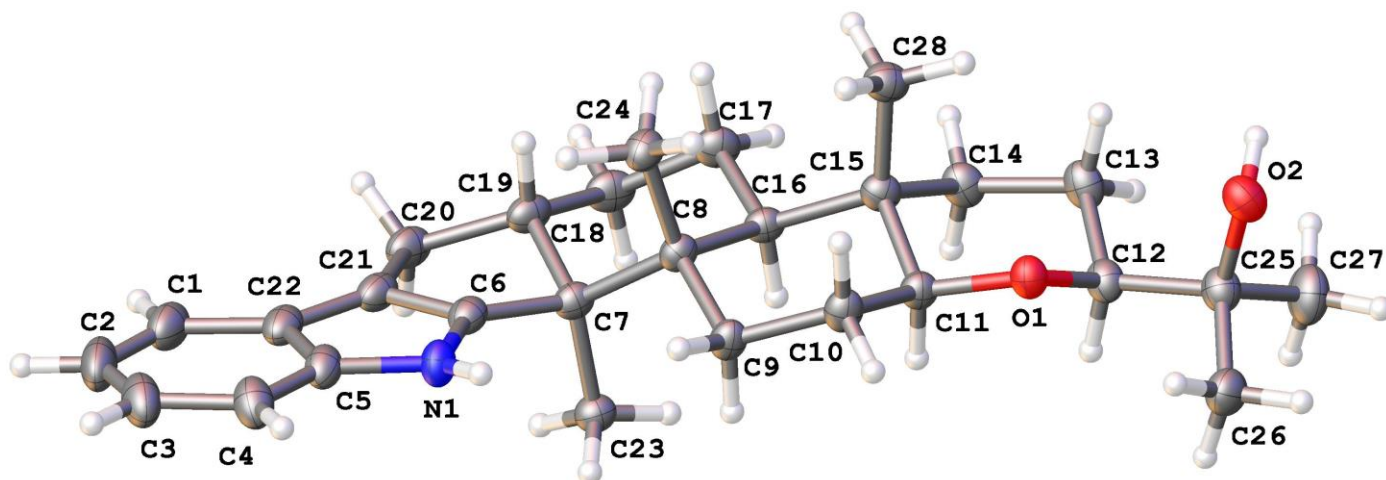

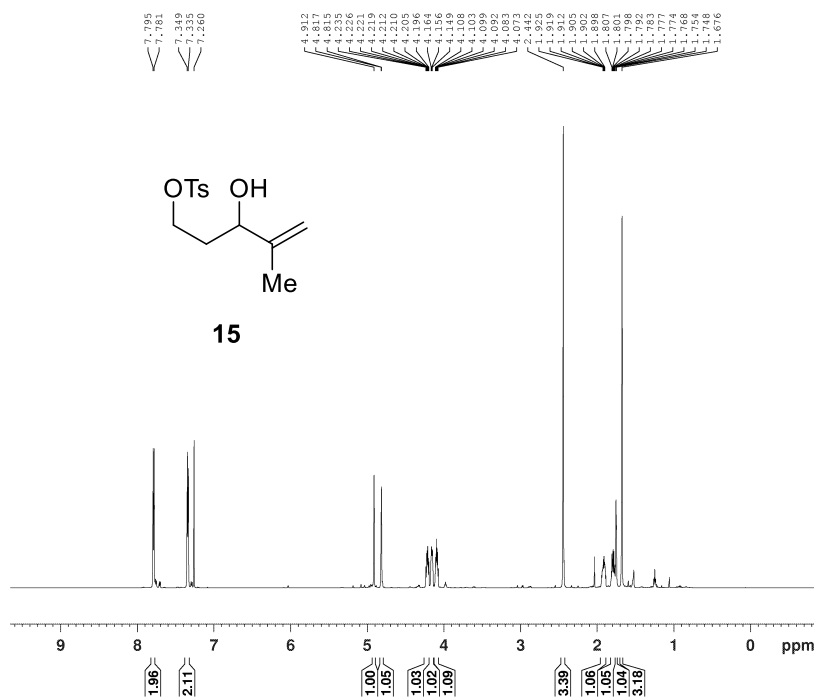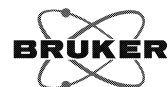

Current Data Parameters  
NAME rjs-2474 Pure Prot  
EXPNO 1  
PROCNO 1

F2 - Acquisition Parameters  
Date\_ 20150228  
Time 9.14  
INSTRUM spect  
PROBHD 5 mm CPQNP 1H/  
PULPROG zg30  
TD 65536  
SOLVENT CDCl3  
NS 13  
DS 2  
SWH 12019.230 Hz  
FIDRES 0.183399 Hz  
AQ 2.7262976 sec  
RG 32  
DW 41.600 usec  
DE 10.00 usec  
TE 298.1 K  
D1 1.00000000 sec  
TDO 1

----- CHANNEL f1 -----  
SF01 600.1337060 MHz  
NUC1 1H  
P1 13.00 usec  
PLW1 9.00000000 w  
F2 - Processing parameters  
SI 65536  
SF 600.1300168 MHz  
WDW EM  
SSB 0  
LB 0.30 Hz  
GB 0  
PC 1.00

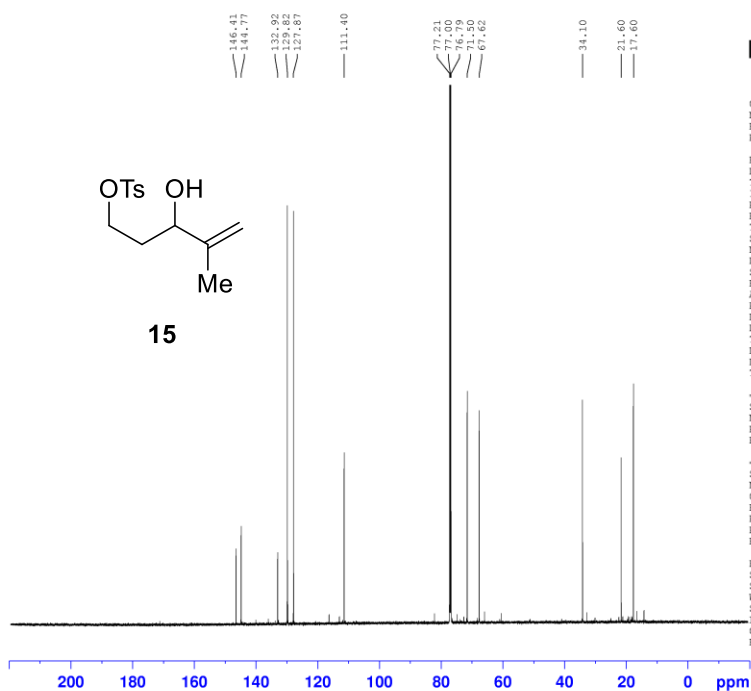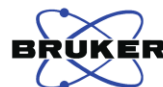

Current Data Parameters  
NAME rjs-2474 Pure Carbon  
EXPNO 1  
PROCNO 1

F2 - Acquisition Parameters  
Date\_ 20150228  
Time 9.19  
INSTRUM spect  
PROBHD 5 mm CPQNP 1H/  
PULPROG zgpg30  
TD 65536  
SOLVENT CDCl3  
NS 49  
DS 4  
SWH 36057.691 Hz  
FIDRES 0.550197 Hz  
AQ 0.9087659 sec  
RG 203  
DW 13.867 usec  
DE 18.00 usec  
TE 298.1 K  
D1 2.00000000 sec  
D11 0.03000000 sec  
TDO 1

----- CHANNEL f1 -----  
SF01 150.9178981 MHz  
NUC1 13C  
P1 11.00 usec  
PLW1 30.00000000 w  
----- CHANNEL f2 -----  
SF02 600.1324005 MHz  
NUC2 1H  
PCPDPRG2 waltz16  
PCPD2 80.00 usec  
PLW2 9.00000000 w  
PLW12 0.26387000 w  
PLW13 0.17016000 w

F2 - Processing parameters  
SI 32768  
SF 150.9028184 MHz  
WDW EM  
SSB 0  
LB 1.00 Hz  
GB 0  
PC 1.40

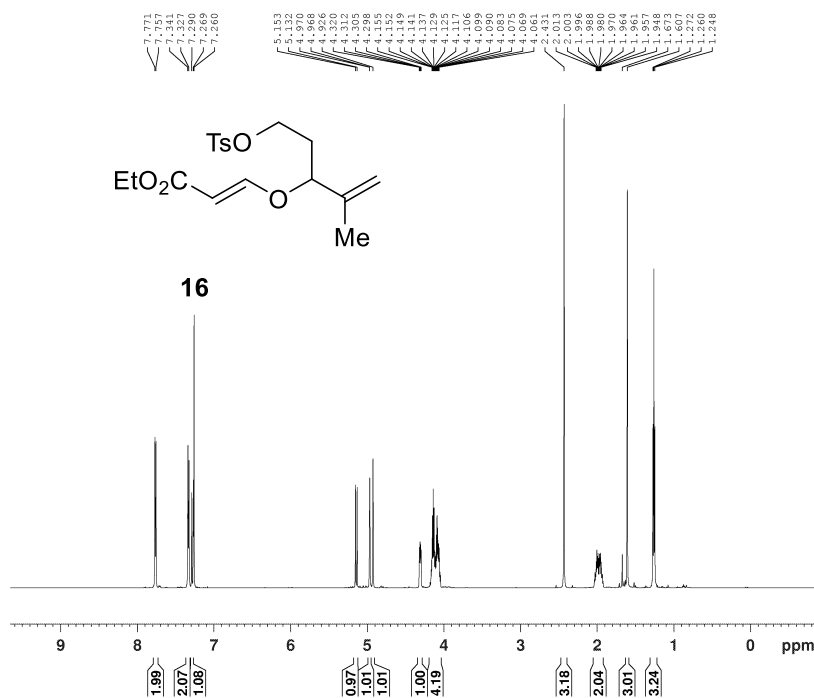

Current Data Parameters  
NAME rjs-2477 Pure  
EXNO 1  
PROCNO 1

F2 - Acquisition Parameter  
Date\_ 20150302  
Time 13.04  
INSTRUM spect  
PROBHD 5 mm CPQNP 1H/  
PULPROG zg30  
TD 65536  
SOLVENT CDCl3  
NS 14  
DS 2  
SWH 12019.230 Hz  
FIDRES 0.183399 Hz  
AQ 2.7262976 se  
RG 32  
DW 41.600 us  
DE 10.00 us  
TE 298.1 K  
D1 1.00000000 se  
TDO 1

===== CHANNEL f1 =====  
SF01 600.1337060 MH  
NUC1 1H  
P1 13.00 us  
PLW1 9.00000000 W

F2 - Processing parameters  
SI 65536  
SF 600.1300171 MH  
WDW EM  
SSB 0  
LB 0.30 Hz  
GB 0  
PC 1.00

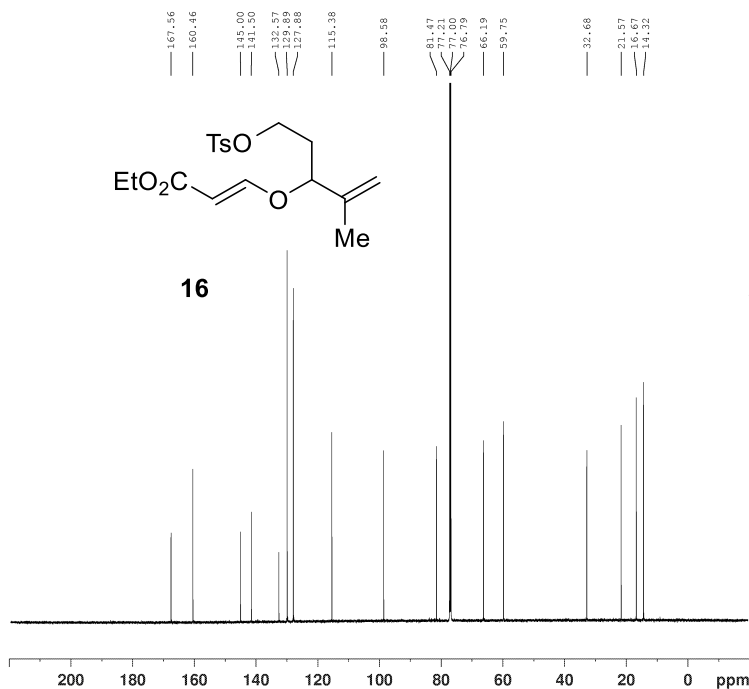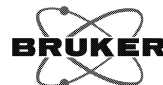

Current Data Parameters  
NAME rjs-2477 Pure Carbon  
EXNO 1  
PROCNO 1

F2 - Acquisition Parameters  
Date\_ 20150302  
Time 13.07  
INSTRUM spect  
PROBHD 5 mm CPQNP 1H/  
PULPROG zgpg30  
TD 65536  
SOLVENT CDCl3  
NS 34  
DS 4  
SWH 36057.691 Hz  
FIDRES 0.550197 Hz  
AQ 0.9087659 sec  
RG 203  
DW 13.867 usec  
DE 18.00 usec  
TE 298.1 K  
D1 2.00000000 sec  
D11 0.03000000 sec  
TDO 1

===== CHANNEL f1 =====  
SF01 150.9178981 MHz  
NUC1 13C  
P1 11.00 usec  
PLW1 30.00000000 W

===== CHANNEL f2 =====  
SF02 600.1324005 MHz  
NUC2 1H  
CDPRG2 waltz16  
PCPD2 80.00 usec  
PLW2 9.00000000 W  
PLW12 0.26587000 W  
PLW13 0.17016000 W

F2 - Processing parameters  
SI 32768  
SF 150.9028184 MHz  
WDW EM  
SSB 0  
LB 1.00 Hz  
GB 0  
PC 1.40

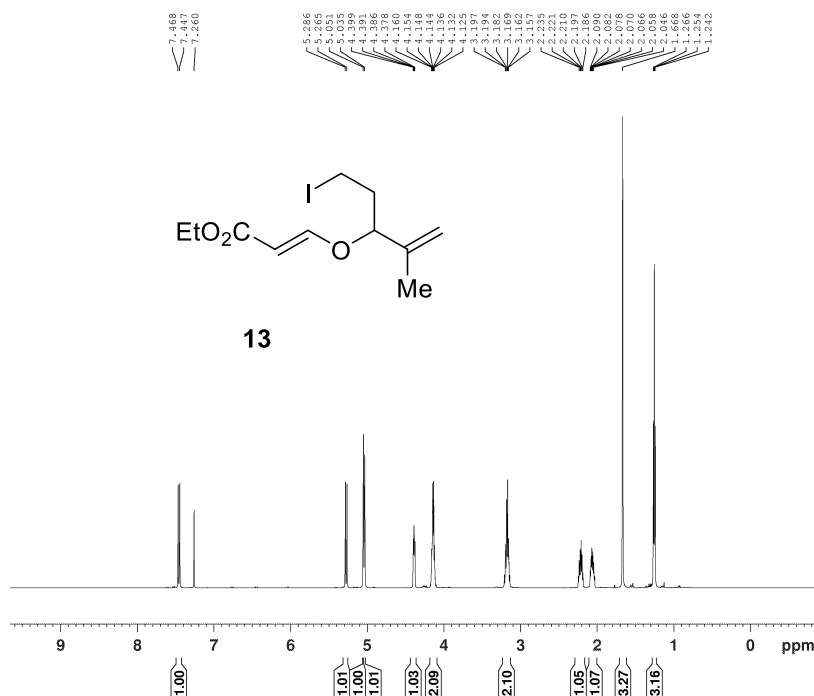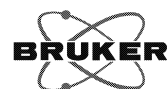

Current Data Parameters  
 NAME rjs-2480 Pure  
 EXPNO 1  
 PROCNO 1

F2 - Acquisition Parameter  
 Date\_ 20150303  
 Time 9.34  
 INSTRUM spect  
 PROBHD 5 mm CPQNP 1H/  
 PULPROG zg30  
 TD 65536  
 SOLVENT CDCl3  
 NS 17  
 DS 2  
 SWH 12019.230 Hz  
 FIDRES 0.183399 Hz  
 AQ 2.7262976 se  
 RG 32  
 DW 41.600 us  
 DE 10.00 us  
 TE 298.1 K  
 D1 1.00000000 se  
 TD0 1

==== CHANNEL f1 =====  
 SF01 600.1337060 MH  
 NUC1 1H  
 P1 13.00 us  
 PLW1 9.00000000 W

F2 - Processing parameters  
 SI 65536  
 SF 600.1300177 MH  
 WDW EM  
 SSB 0  
 LB 0.30 Hz  
 GB 0  
 PC 1.00

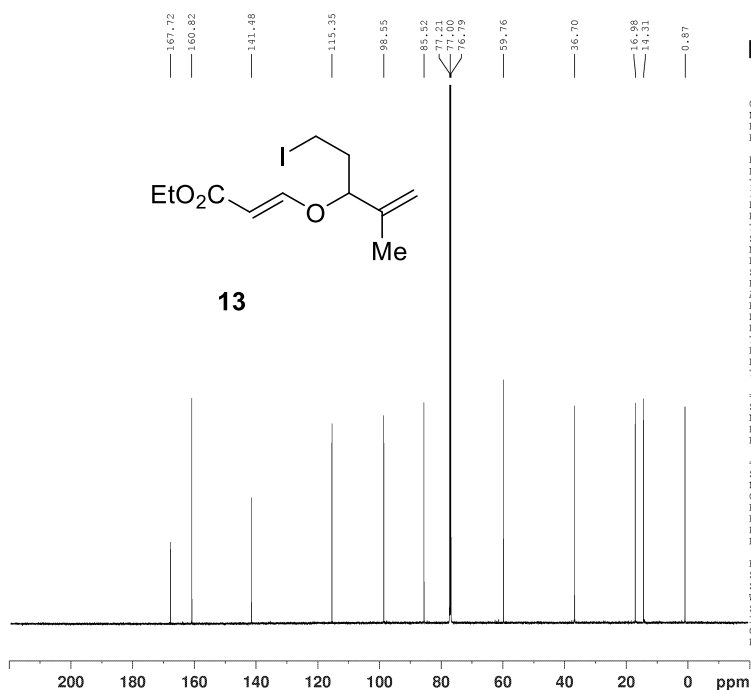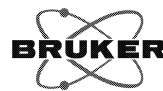

Current Data Parameters  
 NAME rjs-2480 Pure Carbon  
 EXPNO 1  
 PROCNO 1

F2 - Acquisition Parameters  
 Date\_ 20150303  
 Time 9.37  
 INSTRUM spect  
 PROBHD 5 mm CPQNP 1H/  
 PULPROG zgpg30  
 TD 65536  
 SOLVENT CDCl3  
 NS 34  
 DS 4  
 SWH 36057.691 Hz  
 FIDRES 0.550197 Hz  
 AQ 0.9087659 sec  
 RG 203  
 DW 13.867 usec  
 DE 18.00 usec  
 TE 298.2 K  
 D1 2.00000000 sec  
 D11 0.03000000 sec  
 TD0 1

==== CHANNEL f1 =====  
 SF01 150.9178981 MHz  
 NUC1 13C  
 P1 11.00 usec  
 PLW1 30.00000000 W

==== CHANNEL f2 =====  
 SF02 600.1324005 MHz  
 NUC2 1H  
 CPDPRG12 waltz16  
 PCPD2 80.00 usec  
 PLW2 9.00000000 W  
 PLW12 0.26587000 W  
 PLW13 0.17016000 W

F2 - Processing parameters  
 SI 32768  
 SF 150.9028184 MHz  
 WDW EM  
 SSB 0  
 LB 1.00 Hz  
 GB 0  
 PC 1.40



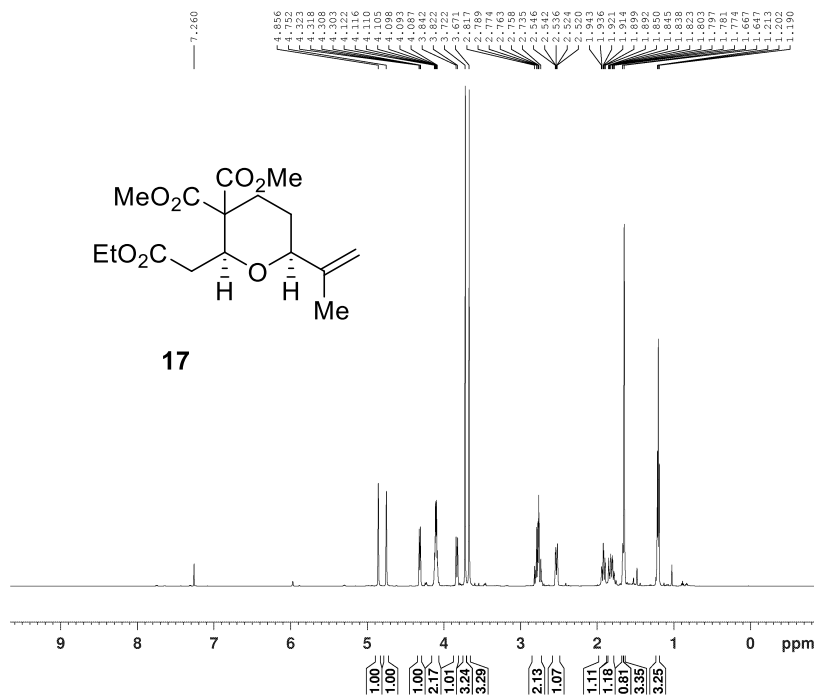

Current Data Parameters  
 NAME rjs-2484 Pure  
 EXPNO 1  
 PROCNO 1

F2 - Acquisition Parameter  
 Date\_ 20150304  
 Time 9.12  
 INSTRUM spect  
 PROBHD 5 mm CPQNP 1H/  
 PULPROG zg30  
 ID 65536  
 SOLVENT CDCl3  
 NS 16  
 DS 2  
 SWH 12019.230 Hz  
 FIDRES 0.183399 Hz  
 AQ 2.7262976 se  
 RG 14.2  
 DW 41.600 us  
 DE 10.00 us  
 TE 298.1 K  
 D1 1.00000000 se  
 TD0 1

==== CHANNEL f1 =====  
 SF01 600.1337060 MH  
 NUC1 1H  
 P1 13.00 us  
 PLW1 9.00000000 W

F2 - Processing parameters  
 SI 65536  
 SF 600.1300176 MH  
 WDW EM  
 SSB 0  
 LB 0.30 Hz  
 GB 0  
 PC 1.00

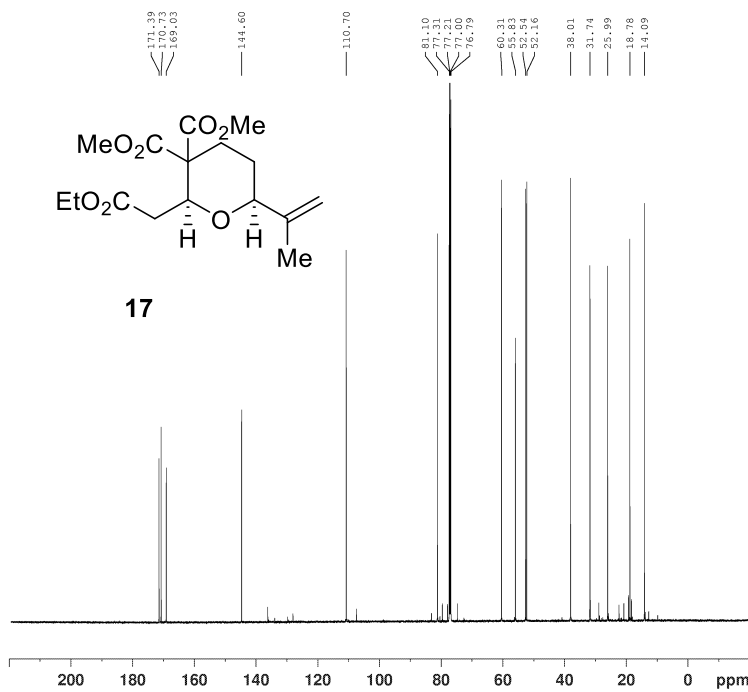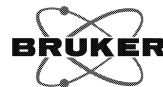

Current Data Parameters  
 NAME rjs-2484 Pure Carbon  
 EXPNO 1  
 PROCNO 1

F2 - Acquisition Parameters  
 Date\_ 20150304  
 Time 9.16  
 INSTRUM spect  
 PROBHD 5 mm CPQNP 1H/  
 PULPROG zgpg30  
 ID 65536  
 SOLVENT CDCl3  
 NS 40  
 DS 4  
 SWH 36057.691 Hz  
 FIDRES 0.550197 Hz  
 AQ 0.9087659 sec  
 RG 203  
 DW 13.867 usec  
 DE 18.00 usec  
 TE 298.2 K  
 D1 2.00000000 sec  
 D11 0.03000000 sec  
 TD0 1

==== CHANNEL f1 =====  
 SF01 150.9178981 MHz  
 NUC1 13C  
 P1 11.00 usec  
 PLW1 30.00000000 W

==== CHANNEL f2 =====  
 SF02 600.1324005 MHz  
 NUC2 1H  
 CPDPRG2 waltz16  
 PCPD2 80.00 usec  
 PLW2 9.00000000 W  
 PLW12 0.26587000 W  
 PLW13 0.17016000 W

F2 - Processing parameters  
 SI 32768  
 SF 150.9028248 MHz  
 WDW EM  
 SSB 0  
 LB 1.00 Hz  
 GB 0  
 PC 1.40

rjs-2484 NOESY

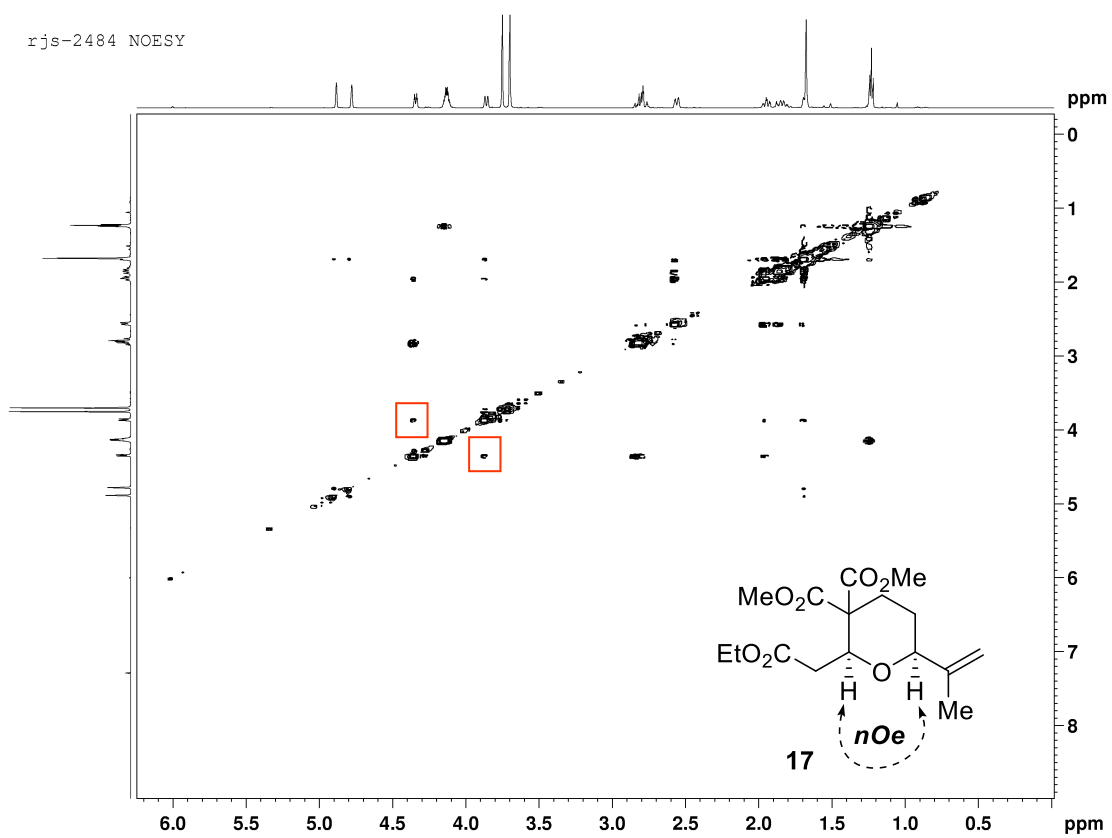

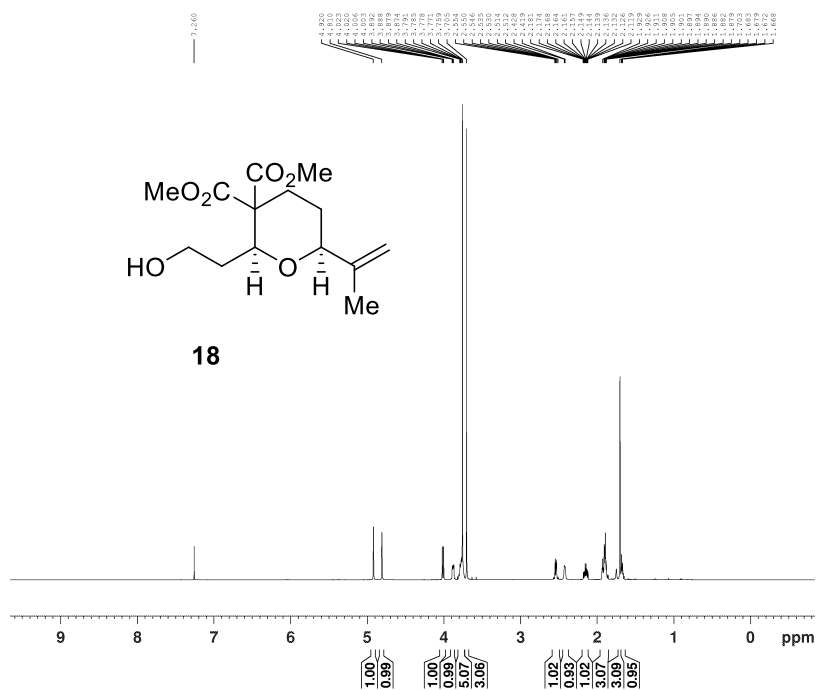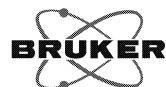

Current Data Parameters  
NAME rjs-2490  
EXNO 1  
PROCNO 1

F2 - Acquisition Parameter  
Date\_ 20150305  
Time 18.51  
INSTRUM spect  
PROBHD 5 mm CPQNP 1H/  
PULPROG zg30  
TD 65536  
SOLVENT CDC13  
NS 16  
DS 2  
SWH 12019.230 Hz  
FIDRES 0.183399 Hz  
AQ 2.7262976 se  
RG 32  
DW 41.600 us  
DE 10.00 us  
TE 298.1 K  
D1 1.00000000 se  
TD0 1

===== CHANNEL f1 =====  
SFO1 600.1337060 MH  
NUC1 1H  
P1 13.00 us  
PLW1 9.00000000 W

F2 - Processing parameters  
SI 65536  
SF 600.1300185 MH  
WDW EM  
SSB 0  
LB 0.30 Hz  
GB 0  
PC 1.00

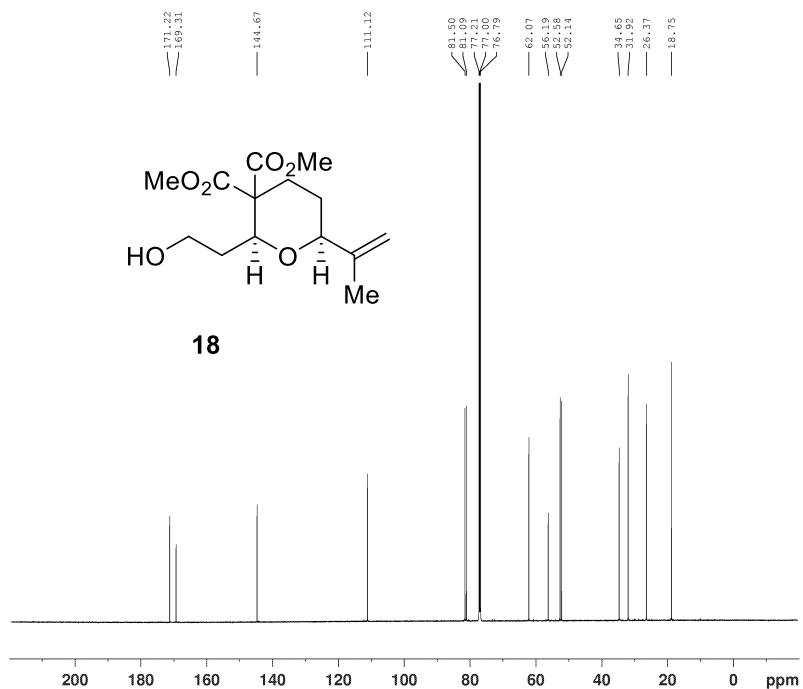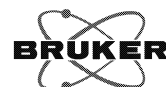

Current Data Parameters  
NAME rjs-2490  
EXNO 2  
PROCNO 1

F2 - Acquisition Parameters  
Date\_ 20150305  
Time 19.05  
INSTRUM spect  
PROBHD 5 mm CPQNP 1H/  
PULPROG zgpg30  
TD 65536  
SOLVENT CDC13  
NS 256  
DS 4  
SWH 36057.691 Hz  
FIDRES 0.350197 Hz  
AQ 0.9087659 sec  
RG 203  
DW 13.867 usec  
DE 18.00 usec  
TE 298.2 K  
D1 2.00000000 sec  
D11 0.03000000 sec  
TD0 1

===== CHANNEL f1 =====  
SFO1 150.9178981 MHZ  
NUC1 13C  
P1 11.00 usec  
PLW1 30.00000000 W

===== CHANNEL f2 =====  
SFO2 600.1324005 MHZ  
NUC2 1H  
CPDPRG[2] waltz16  
PCPD2 80.00 usec  
PLW2 9.00000000 W  
PLW12 0.26587000 W  
PLW13 0.17016000 W

F2 - Processing parameters  
SI 32768  
SF 150.9028168 MHZ  
WDW EM  
SSB 0  
LB 1.00 Hz  
GB 0  
PC 1.40

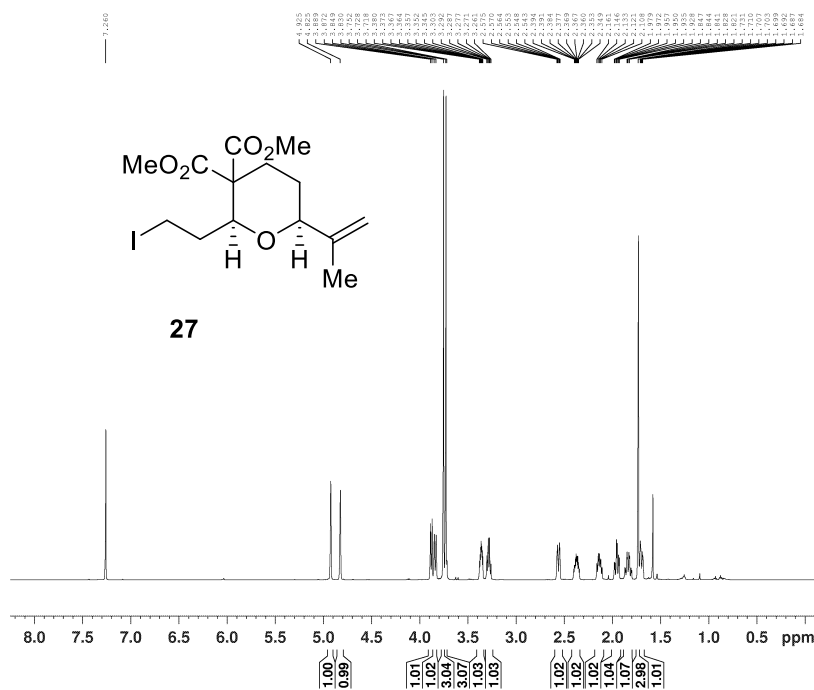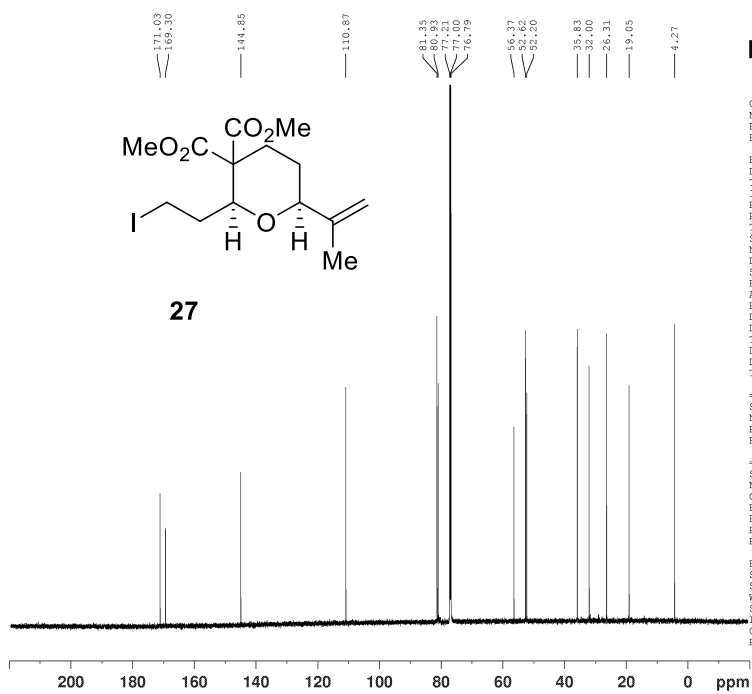

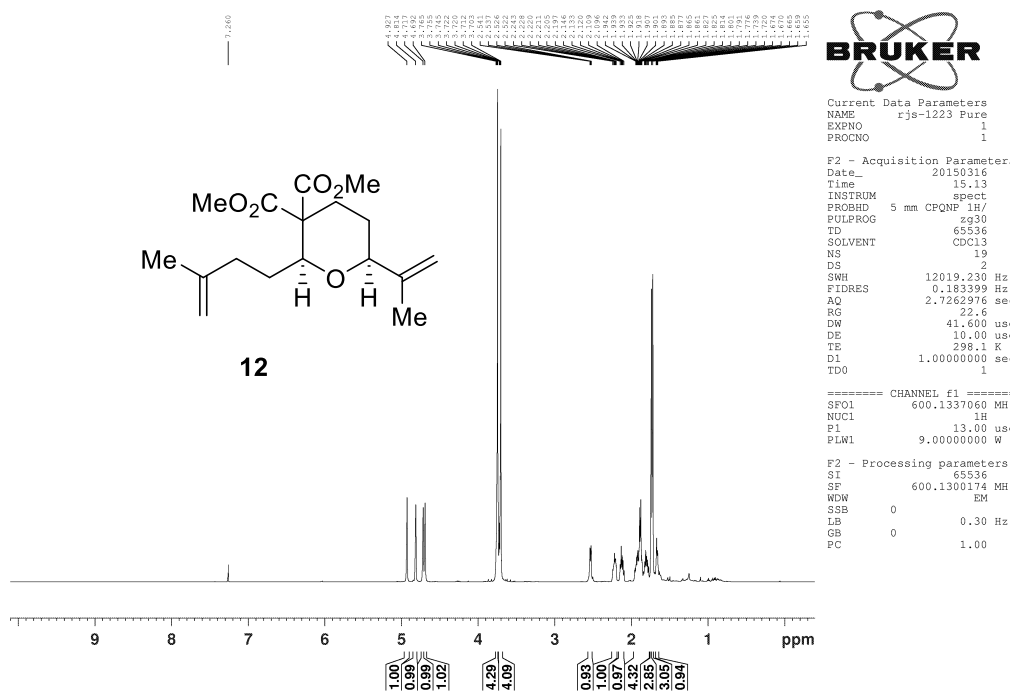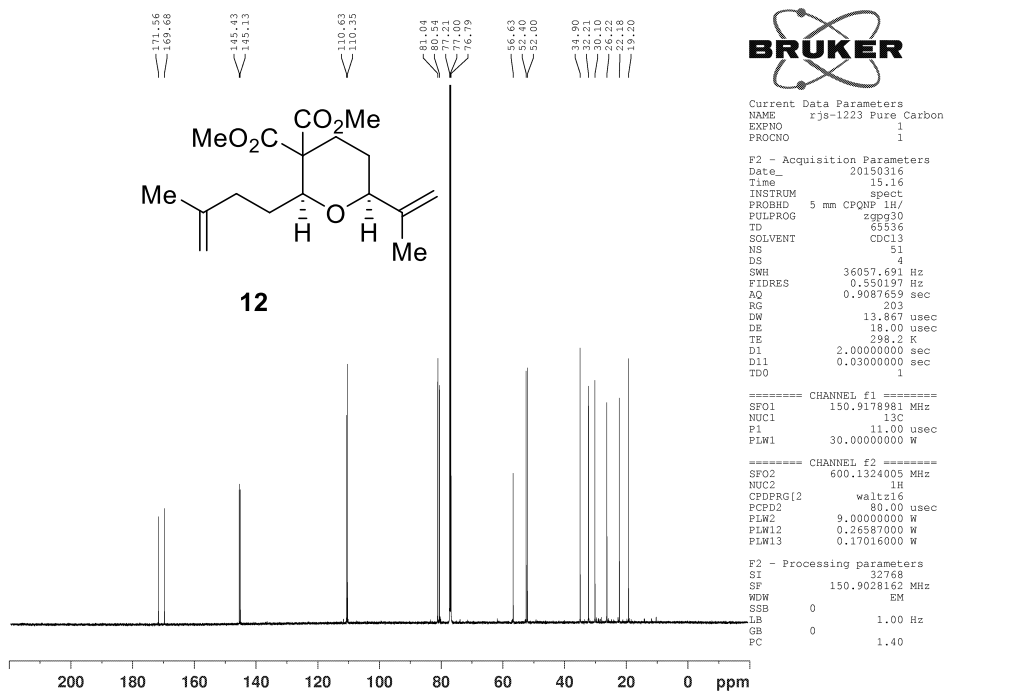

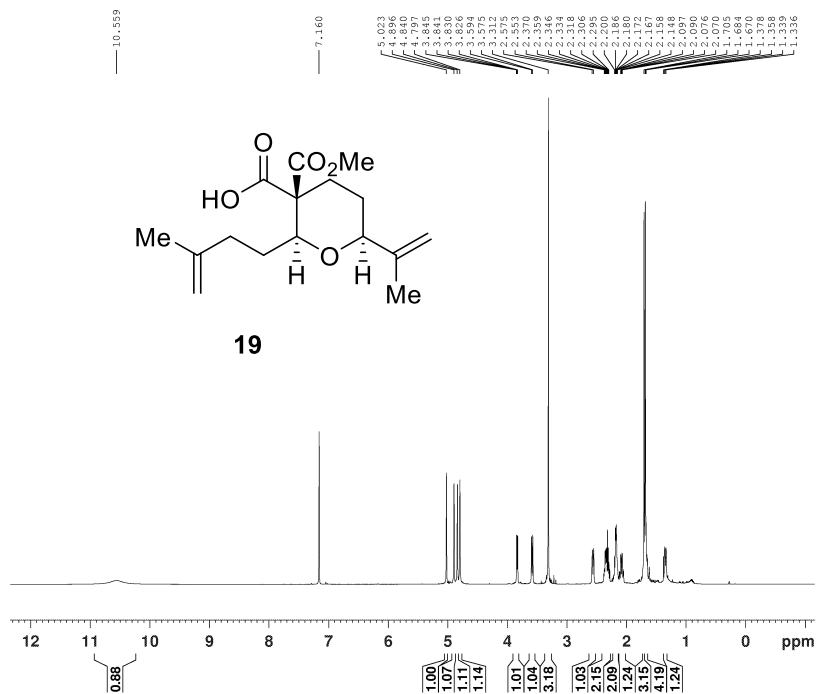

Current Data Parameters  
NAME rjs-1226 Pure Benze  
EXPRD 1  
PROCNO 1

F2 - Acquisition Parameters  
Date\_ 20150420  
Time 17.31  
INSTRUM spect  
PROBHD 5 mm CPQCI 1H/  
PULPROG zg30  
TD 65536  
SOLVENT C6D6  
NS 8  
DS 2  
SWH 12019.230 Hz  
FIDRES 0.183399 Hz  
AQ 2.7262976 sec  
RG 11.3  
DW 41.600 usec  
DE 10.00 usec  
TE 293.0 K  
D1 1.0000000 sec  
TD0 1

===== CHANNEL f1 =====  
SFO1 600.1337060 MHz  
NUC1 13  
P1 10.15 usec  
PLW1 13.00000000 W

F2 - Processing parameters  
SI 65536  
SF 600.1299948 MHz  
WDW EM  
SSB 0 0.30 Hz  
LB 0  
GB 0  
PC 1.60

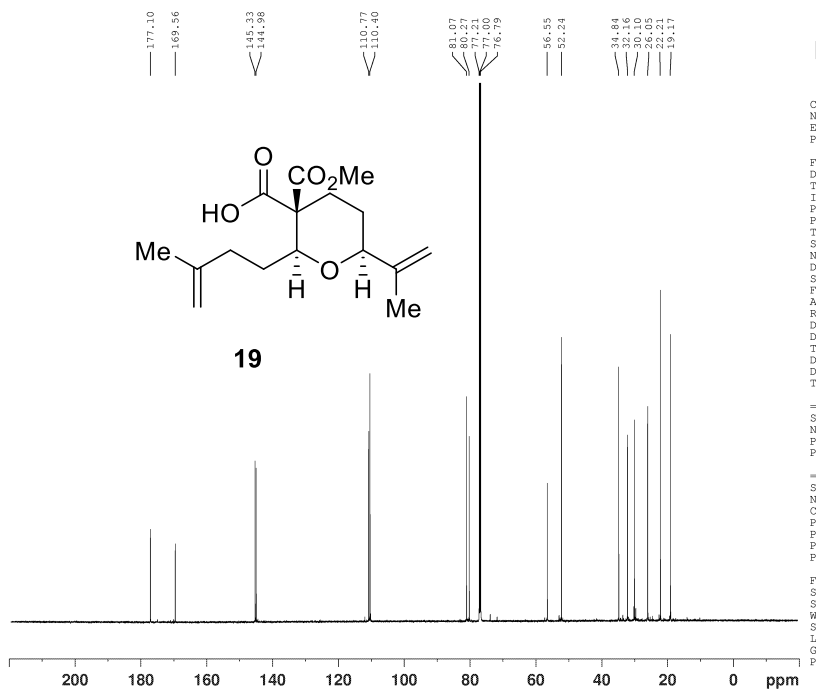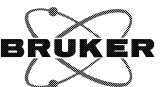

Current Data Parameters  
NAME rjs-1225  
EXPRD 2  
PROCNO 1

F2 - Acquisition Parameters  
Date\_ 20150324  
Time 13.32  
INSTRUM spect  
PROBHD 5 mm CPQNP 1H/  
PULPROG zgpg30  
TD 65536  
SOLVENT CDC13  
NS 128  
DS 4  
SWH 36057.691 Hz  
FIDRES 0.350197 Hz  
AQ 0.9087659 sec  
RG 203  
DW 13.867 usec  
DE 18.00 usec  
TE 298.1 K  
D1 2.0000000 sec  
D11 0.03000000 sec  
TD0 1

===== CHANNEL f1 =====  
SFO1 150.9178981 MHz  
NUC1 13C  
P1 11.00 usec  
PLW1 30.00000000 W

===== CHANNEL f2 =====  
SFO2 600.1324005 MHz  
NUC2 1H  
CPDPRG[2] waltz16  
PCPD2 80.00 usec  
PLW2 9.00000000 W  
PLW12 0.26587000 W  
PLW13 0.17016000 W

F2 - Processing parameters  
SI 32768  
SF 150.9028151 MHz  
WDW EM  
SSB 0 1.00 Hz  
LB 0  
GB 0  
PC 1.40

# nOesy spectrum of 19 (in C<sub>6</sub>D<sub>6</sub>)

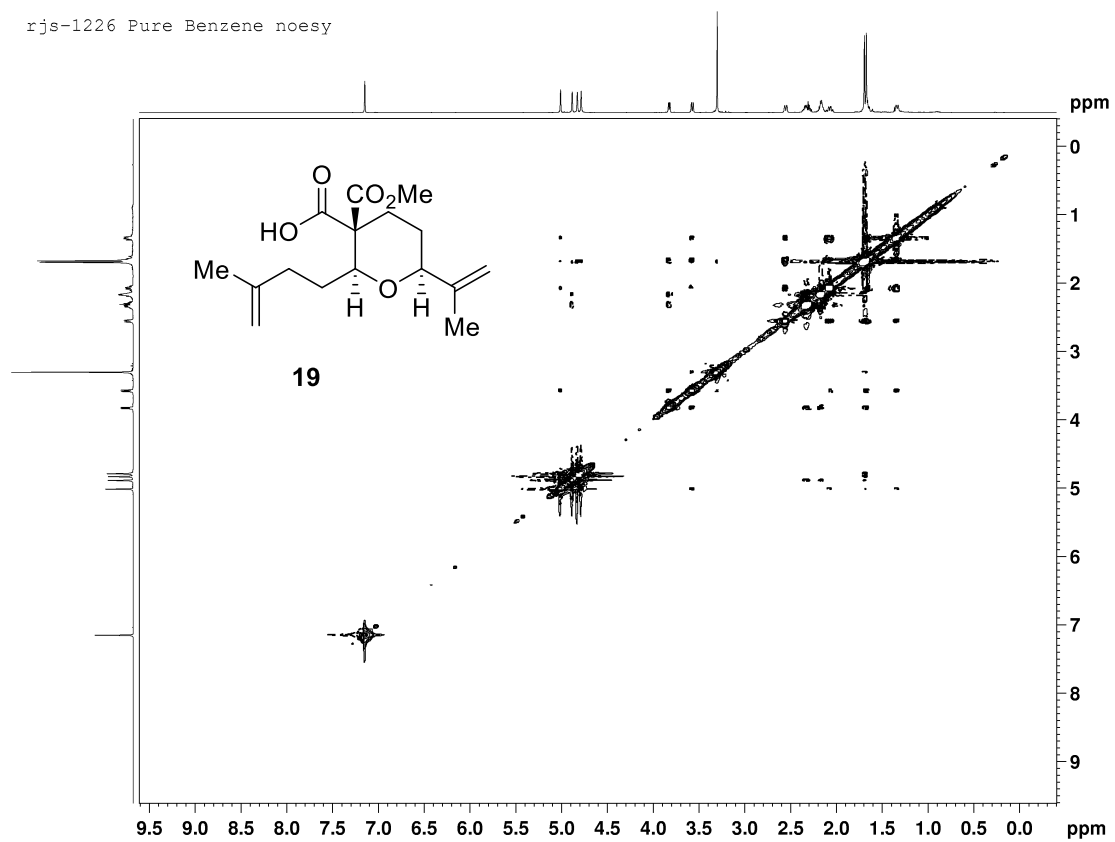

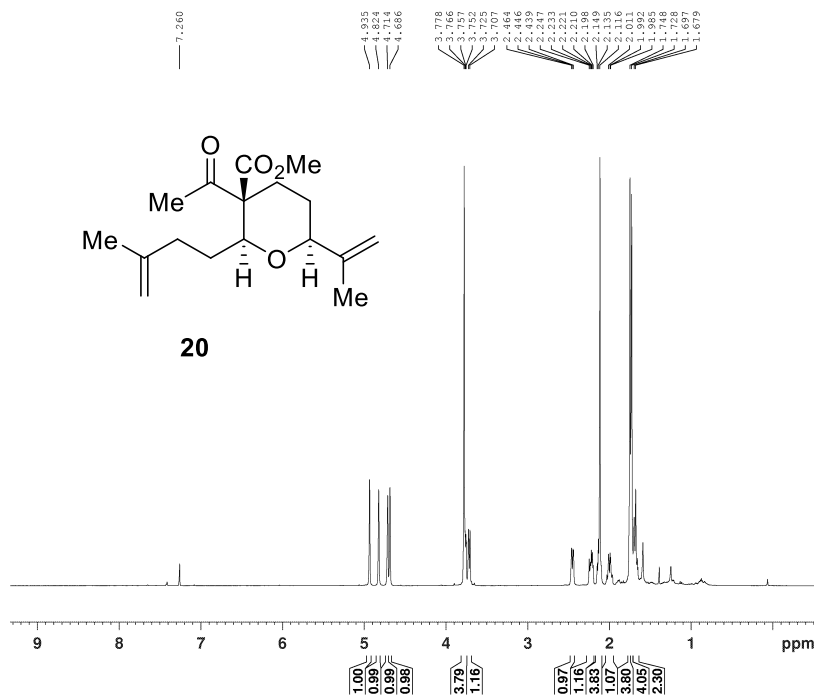

Current Data Parameters  
 NAME rjs-1228 Pure Carbon  
 EXPNO 1  
 PROCNO 1

F2 - Acquisition Parameter  
 Date\_ 20150318  
 Time 6.32  
 INSTRUM spect  
 PROBHD 5 mm CPQNP 1H/  
 PULPROG zgpg30  
 TD 65536  
 SOLVENT CDCl3  
 NS 52  
 DS 4  
 SWH 36057.691 Hz  
 FIDRES 0.550197 Hz  
 AQ 0.9087659 sec  
 RG 203  
 DW 13.867 usec  
 DE 18.00 usec  
 TE 298.2 K  
 D1 2.00000000 sec  
 D11 0.03000000 sec  
 TD0 1

==== CHANNEL f1 =====  
 SF01 150.9178981 MHz  
 NUC1 13C  
 P1 11.00 usec  
 PLW1 30.00000000 W

==== CHANNEL f2 =====  
 SF02 600.1324005 MHz  
 NUC2 1H  
 CPDPRG2 waltz16  
 FCPD2 80.00 usec  
 PLW2 9.00000000 W  
 PLW12 0.26587000 W  
 PLW13 0.17016000 W

F2 - Processing parameters  
 SI 32768  
 SF 150.9028129 MHz  
 WDW EM  
 SSB 0  
 LB 1.00 Hz  
 GB 0  
 FC 1.40

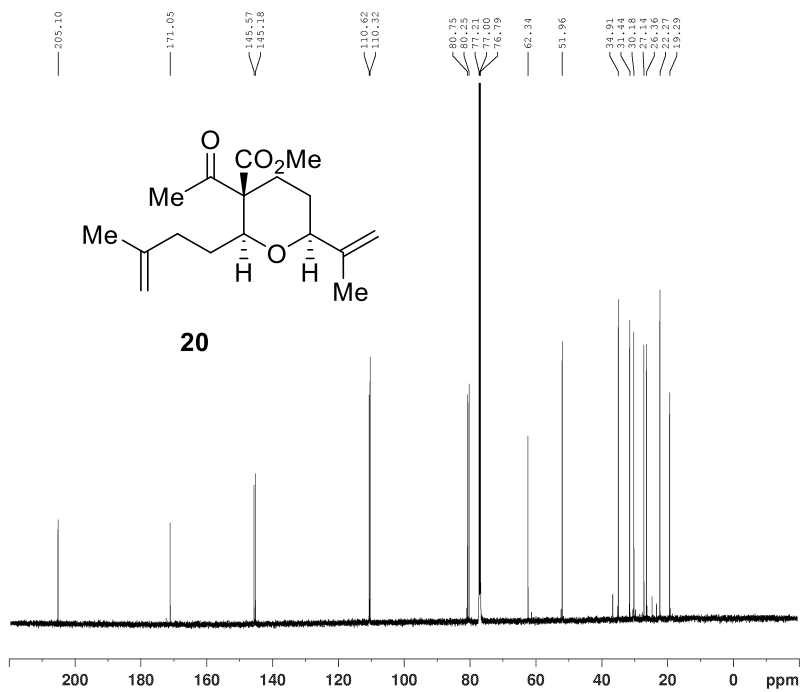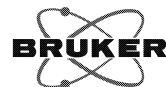

Current Data Parameters  
 NAME rjs-1228 Pure Carbon  
 EXPNO 1  
 PROCNO 1

F2 - Acquisition Parameter  
 Date\_ 20150318  
 Time 6.32  
 INSTRUM spect  
 PROBHD 5 mm CPQNP 1H/  
 PULPROG zgpg30  
 TD 65536  
 SOLVENT CDCl3  
 NS 52  
 DS 4  
 SWH 36057.691 Hz  
 FIDRES 0.550197 Hz  
 AQ 0.9087659 sec  
 RG 203  
 DW 13.867 usec  
 DE 18.00 usec  
 TE 298.2 K  
 D1 2.00000000 sec  
 D11 0.03000000 sec  
 TD0 1

==== CHANNEL f1 =====  
 SF01 150.9178981 MHz  
 NUC1 13C  
 P1 11.00 usec  
 PLW1 30.00000000 W

==== CHANNEL f2 =====  
 SF02 600.1324005 MHz  
 NUC2 1H  
 CPDPRG2 waltz16  
 FCPD2 80.00 usec  
 PLW2 9.00000000 W  
 PLW12 0.26587000 W  
 PLW13 0.17016000 W

F2 - Processing parameters  
 SI 32768  
 SF 150.9028129 MHz  
 WDW EM  
 SSB 0  
 LB 1.00 Hz  
 GB 0  
 FC 1.40



# nOesy spectrum of 20 (in C<sub>6</sub>D<sub>6</sub>)

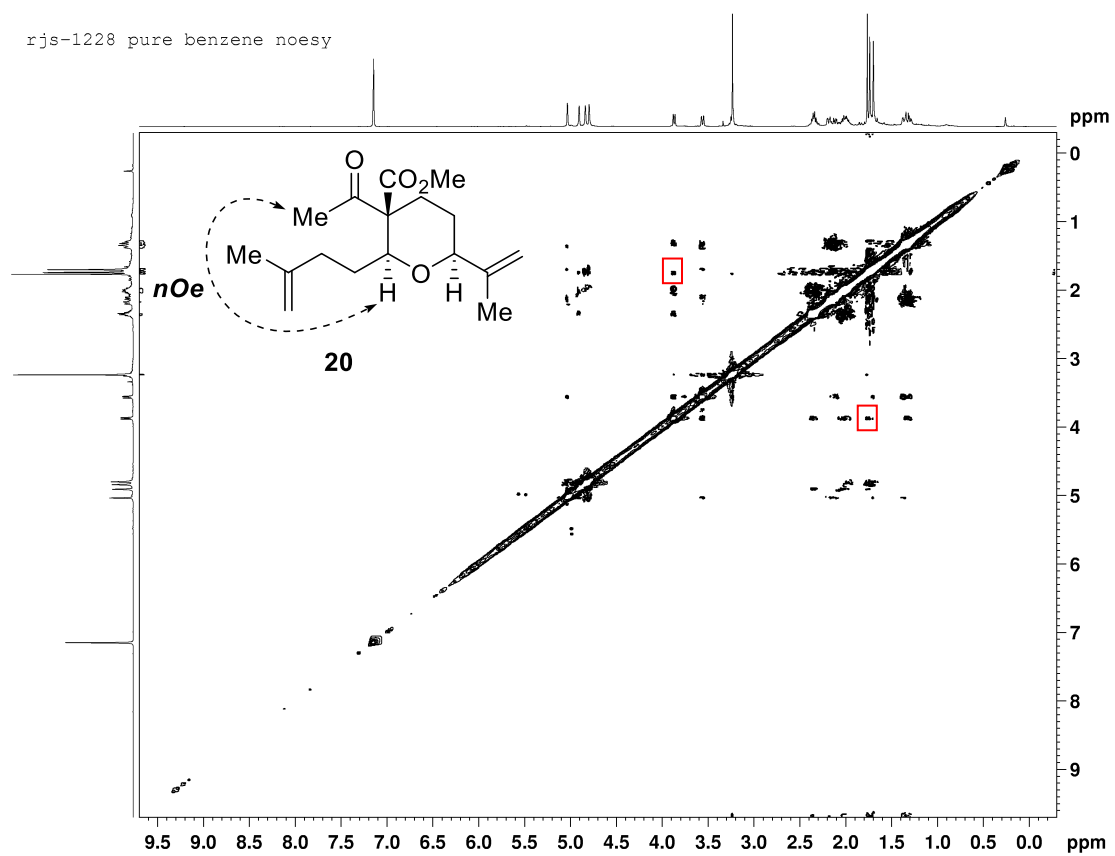

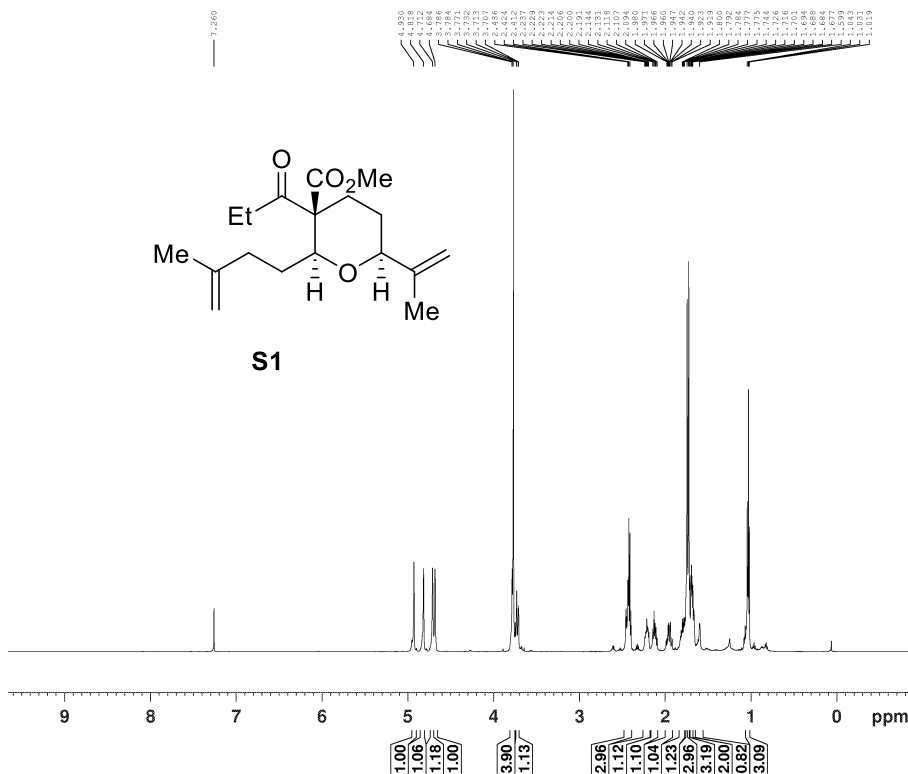

**BRUKER**

Current Data Parameters  
 NAME rjs-1229 Pure prot  
 EXPNO 1  
 PROCNO 1

F2 - Acquisition Parameters  
 Date\_ 20150323  
 Time 6.10  
 INSTRUM spect  
 PROBHD 5 mm CPQNP 1H/  
 PULPROG zg30  
 TD 65536  
 SOLVENT CDCl3  
 NS 15  
 DS 2  
 SWH 12019.230 Hz  
 FIDRES 0.183399 Hz  
 AQ 2.7262976 sec  
 RG 32  
 DW 41.600 usec  
 DE 10.00 usec  
 TE 298.1 K  
 D1 1.0000000 sec  
 TD0 1

----- CHANNEL f1 -----  
 SFO1 600.1337060 MHz  
 NUC1 1H  
 P1 13.00 usec  
 PLW1 9.0000000 W

F2 - Processing parameters  
 SI 65536  
 SF 600.1300164 MHz  
 WDW EM  
 SSB 0  
 LB 0.30 Hz  
 GB 0  
 PC 1.00

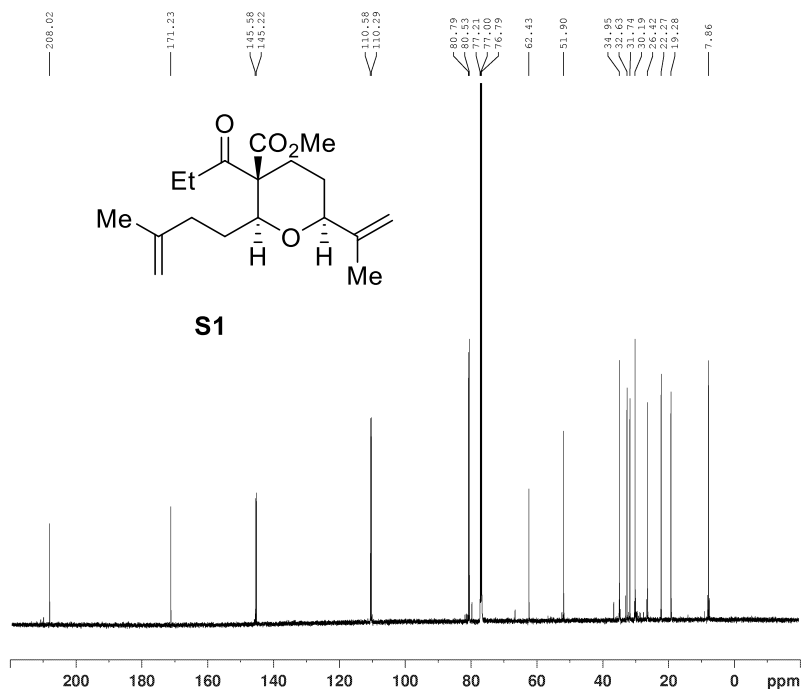

**BRUKER**

Current Data Parameters  
 NAME rjs-1229 Pure Carbon  
 EXPNO 1  
 PROCNO 1

F2 - Acquisition Parameters  
 Date\_ 20150323  
 Time 6.13  
 INSTRUM spect  
 PROBHD 5 mm CPQNP 1H/  
 PULPROG zgpg30  
 TD 65536  
 SOLVENT CDCl3  
 NS 57  
 DS 4  
 SWH 36057.691 Hz  
 FIDRES 0.550197 Hz  
 AQ 0.9087659 sec  
 RG 203  
 DW 13.867 usec  
 DE 18.00 usec  
 TE 298.1 K  
 D1 2.0000000 sec  
 D11 0.0300000 sec  
 TD0 1

----- CHANNEL f1 -----  
 SFO1 150.9178981 MHz  
 NUC1 13C  
 P1 11.00 usec  
 PLW1 30.0000000 W

----- CHANNEL f2 -----  
 SFO2 600.1324005 MHz  
 NUC2 1H  
 CPDPRG12 waltz16  
 PCPD2 80.00 usec  
 PLW2 9.0000000 W  
 PLM12 0.2458700 W  
 PLM13 0.1701600 W

F2 - Processing parameters  
 SI 32768  
 SF 150.9028140 MHz  
 WDW EM  
 SSB 0  
 LB 1.00 Hz  
 GB 0  
 PC 1.40

# nOesy spectrum of S1 (in C<sub>6</sub>D<sub>6</sub>)

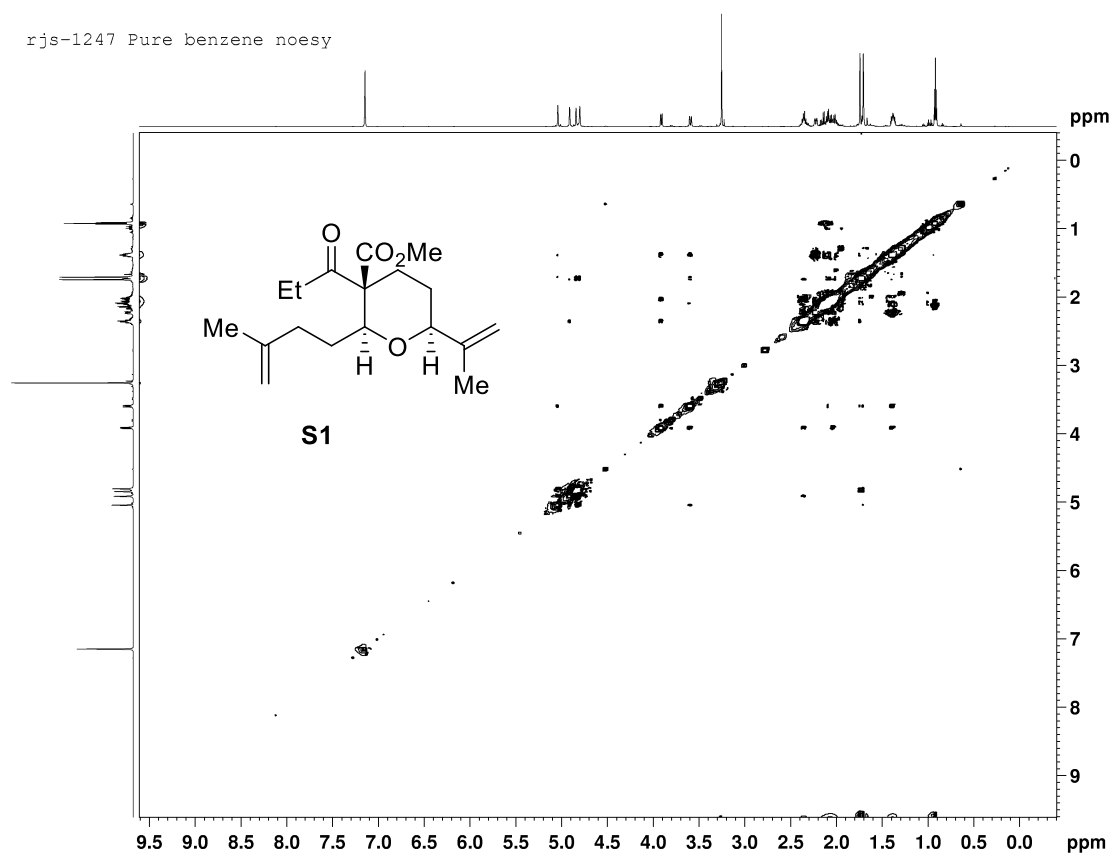

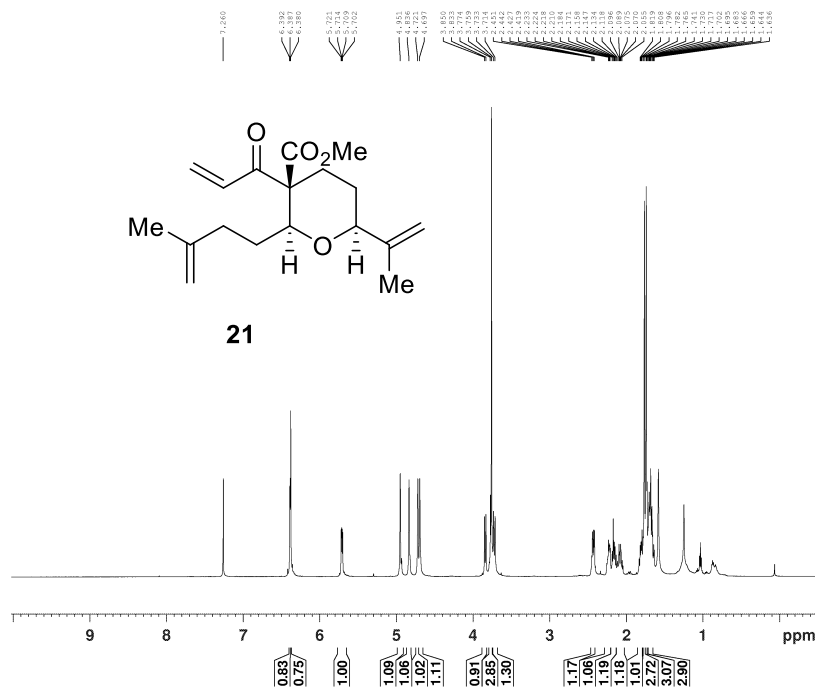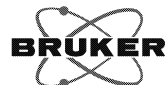

Current Data Parameters  
 NAME rjs-1254  
 EXPNO 1  
 PROCNO 1

F2 - Acquisition Parameter  
 Date\_ 20150414  
 Time 14.44  
 INSTRUM spect  
 PROBRD 5 mm CPQCI 1H/  
 PULPROG zg30  
 TD 65536  
 SOLVENT CDC13  
 NS 16  
 DS 2  
 SWH 12019.230 Hz  
 FIDRES 0.183399 Hz  
 AQ 2.7262976 se  
 RG 18  
 DW 41.600 us  
 DE 10.00 us  
 TE 293.0 K  
 D1 1.00000000 se  
 TD0 1

===== CHANNEL f1 =====  
 SF01 600.1337060 MH  
 NUC1 1H  
 P1 10.15 us  
 PLW1 13.00000000 W

F2 - Processing parameters  
 SI 65536  
 SF 600.1300146 MH  
 WDW EM  
 SSB 0  
 LB 0.30 Hz  
 GB 0  
 PC 1.00

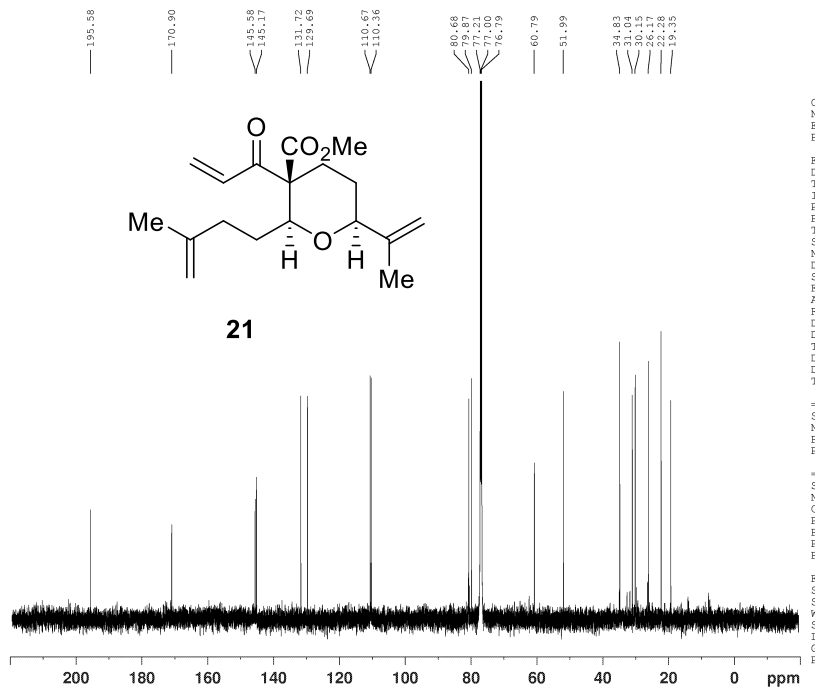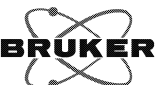

Current Data Parameters  
 NAME rjs-1254  
 EXPNO 2  
 PROCNO 1

F2 - Acquisition Parameters  
 Date\_ 20150414  
 Time 14.51  
 INSTRUM spect  
 PROBRD 5 mm CPQCI 1H/  
 PULPROG zgpg30  
 TD 65536  
 SOLVENT CDC13  
 NS 128  
 DS 4  
 SWH 36057.691 Hz  
 FIDRES 0.350197 Hz  
 AQ 0.9087659 sec  
 RG 203  
 DW 13.867 usec  
 DE 18.00 usec  
 TE 293.0 K  
 D1 2.00000000 sec  
 D11 0.03000000 sec  
 TD0 1

===== CHANNEL f1 =====  
 SF01 150.9178981 MHz  
 NUC1 13C  
 P1 11.50 usec  
 PLW1 230.00000000 W

===== CHANNEL f2 =====  
 SF02 600.1324005 MHz  
 NUC2 1H  
 CPDPRG[2] waltz16  
 PCPD2 90.00 usec  
 PLW2 13.00000000 W  
 PLW12 0.16534001 W  
 PLW13 0.13393000 W

F2 - Processing parameters  
 SI 32768  
 SF 150.9028150 MHz  
 WDW EM  
 SSB 0  
 LB 1.00 Hz  
 GB 0  
 PC 1.40

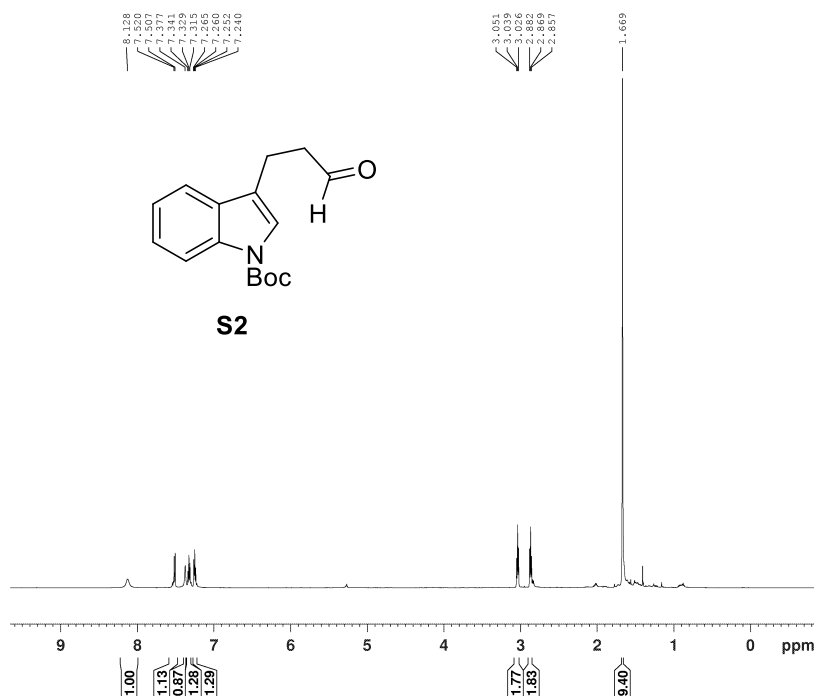

Current Data Parameters  
 NAME rjs-1232 Pure Prot  
 EXPNO 1  
 PROCNO 1

F2 - Acquisition Parameters  
 Date\_ 20150323  
 Time 6.25  
 INSTRUM spect  
 PROBHD 5 mm CPQNP 1H/  
 PULPROG zg30  
 TD 65536  
 SOLVENT CDCl3  
 NS 19  
 DS 2  
 SWH 12019.230 Hz  
 FIDRES 0.183399 Hz  
 AQ 2.7262976 sec  
 RG 32  
 DW 41.600 usec  
 DE 10.00 usec  
 TE 298.1 K  
 D1 1.00000000 sec  
 TD0 1

----- CHANNEL f1 -----  
 SF01 600.1337060 MHz  
 NUC1 1H  
 P1 13.00 usec  
 PLW1 9.00000000 W  
 F2 - Processing parameters  
 SI 65536  
 SF 600.1300163 MHz  
 WDW EM  
 SSB 0  
 LB 0.30 Hz  
 GB 0  
 PC 1.00

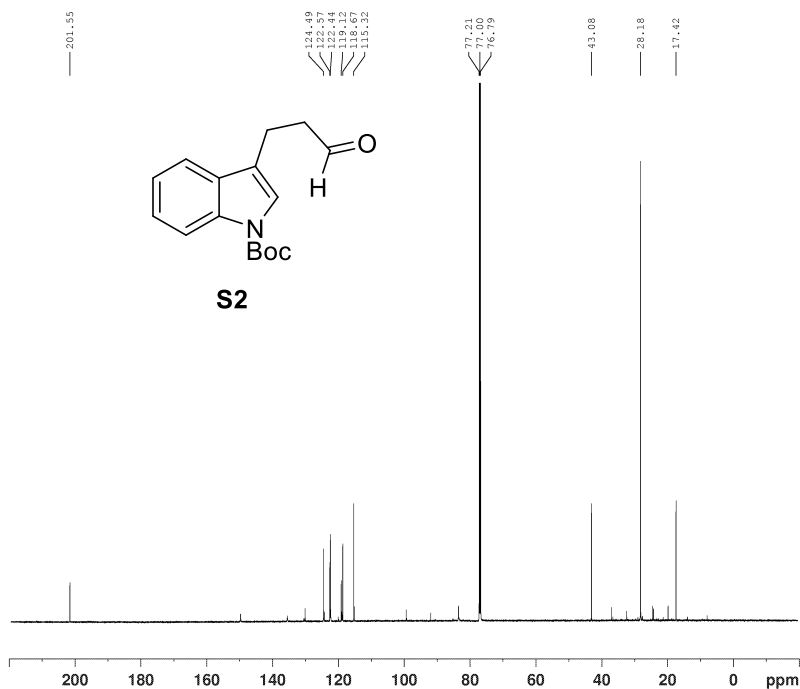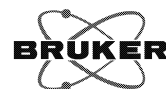

Current Data Parameters  
 NAME rjs-1232 Pure Carbon  
 EXPNO 1  
 PROCNO 1

F2 - Acquisition Parameters  
 Date\_ 20150323  
 Time 6.29  
 INSTRUM spect  
 PROBHD 5 mm CPQNP 1H/  
 PULPROG zgpg30  
 TD 65536  
 SOLVENT CDCl3  
 NS 62  
 DS 4  
 SWH 36057.691 Hz  
 FIDRES 0.250197 Hz  
 AQ 0.9087639 sec  
 RG 203  
 DW 13.867 usec  
 DE 18.00 usec  
 TE 298.1 K  
 D1 2.00000000 sec  
 D11 0.03000000 sec  
 TD0 1

----- CHANNEL f1 -----  
 SF01 150.9178981 MHz  
 NUC1 13C  
 P1 11.00 usec  
 PLW1 30.00000000 W

----- CHANNEL f2 -----  
 SF02 600.1324005 MHz  
 NUC2 1H  
 CPDPRG12 waltz16  
 PCPD2 80.00 usec  
 PLW2 9.00000000 W  
 PLW12 0.26387000 W  
 PLW13 0.17096000 W

F2 - Processing parameters  
 SI 32768  
 SF 150.9028173 MHz  
 WDW EM  
 SSB 0  
 LB 1.00 Hz  
 GB 0  
 PC 1.40

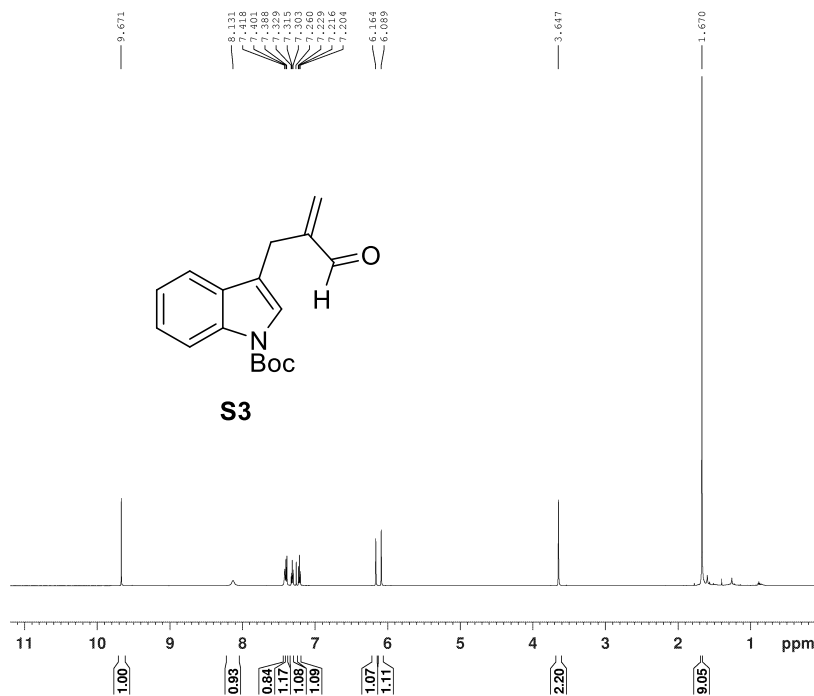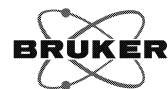

Current Data Parameters  
 NAME rjs-1243  
 EXPNO 1  
 PROCNO 1

F2 - Acquisition Parameter  
 Date\_ 20150324  
 Time 13.55  
 INSTRUM spect  
 PROBHD 5 mm CPQNP 1H/  
 PULPROG zg30  
 TD 65536  
 SOLVENT CDC13  
 NS 16  
 DS 2  
 SWH 12019.230 Hz  
 FIDRES 0.183399 Hz  
 AQ 2.7262976 se  
 RG 32  
 DW 41.600 us  
 DE 10.00 us  
 TE 298.1 K  
 D1 1.00000000 se  
 TD0 1

==== CHANNEL f1 =====  
 SF01 600.1337060 MH  
 NUC1 1H  
 P1 13.00 us  
 PLW1 9.00000000 W

F2 - Processing parameters  
 SI 65536  
 SF 600.1300166 MH  
 WDW EM  
 SSB 0  
 LB 0.30 Hz  
 GB 0  
 PC 1.00

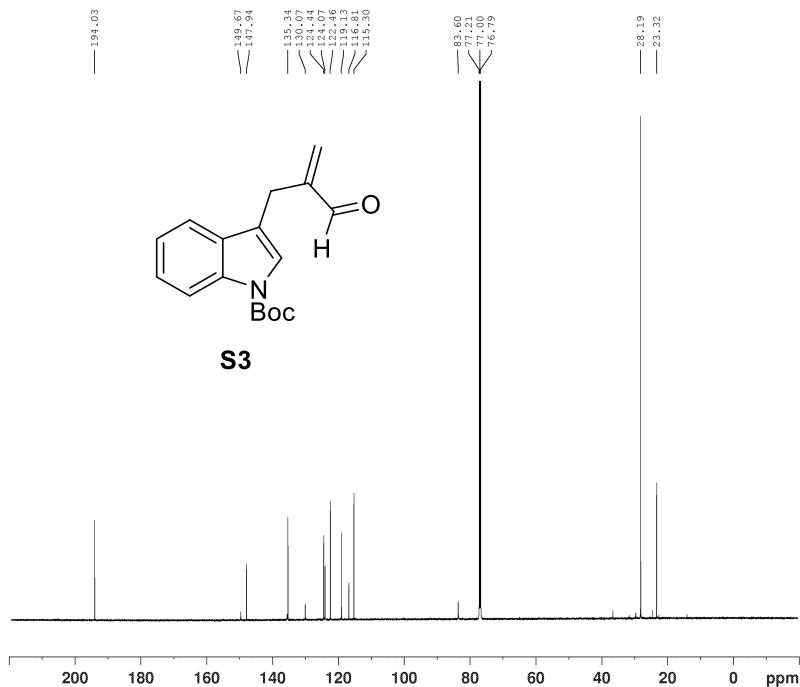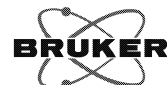

Current Data Parameters  
 NAME rjs-1243  
 EXPNO 2  
 PROCNO 1

F2 - Acquisition Parameters  
 Date\_ 20150324  
 Time 14.02  
 INSTRUM spect  
 PROBHD 5 mm CPQNP 1H/  
 PULPROG zgpg30  
 TD 65536  
 SOLVENT CDC13  
 NS 128  
 DS 4  
 SWH 36057.691 Hz  
 FIDRES 0.350197 Hz  
 AQ 0.9087659 sec  
 RG 203  
 DW 13.867 usec  
 DE 18.00 usec  
 TE 298.1 K  
 D1 2.00000000 sec  
 D11 0.03000000 sec  
 TD0 1

==== CHANNEL f1 =====  
 SF01 150.9178981 MHz  
 NUC1 13C  
 P1 11.00 usec  
 PLW1 30.00000000 W

==== CHANNEL f2 =====  
 SF02 600.1324005 MHz  
 NUC2 1H  
 CPDPRG2 waltz16  
 PCPD2 80.00 usec  
 PLW2 9.00000000 W  
 PLM2 0.26587000 W  
 PLM3 0.17016000 W

F2 - Processing parameters  
 SI 32768  
 SF 150.9028140 MHz  
 WDW EM  
 SSB 0  
 LB 1.00 Hz  
 GB 0  
 PC 1.40

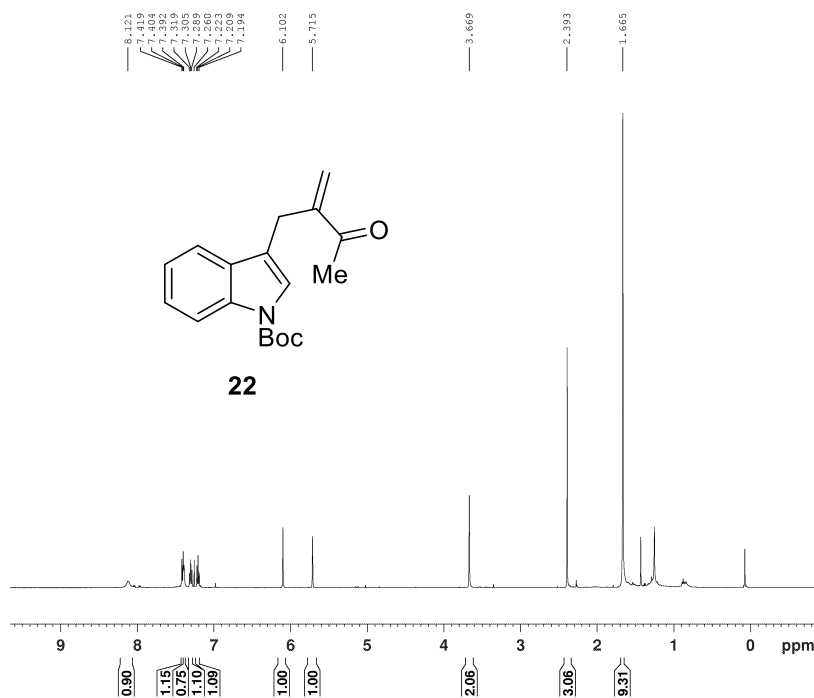

Current Data Parameters  
 NAME rjs-1246  
 EXPNO 1  
 PROCNO 1

F2 - Acquisition Parameter  
 Date\_ 20150327  
 Time 14.19 h  
 INSTRUM spect  
 FROBHD z810701\_0092 f  
 PULPROG zg30  
 TD 65536  
 SOLVENT CDCl3  
 NS 5  
 DS 2  
 SWH 10000.000 Hz  
 FIDRES 0.152588 Hz  
 AQ 3.2767999 se  
 RG 79.57  
 DW 50.000 us  
 DE 6.50 us  
 TE 292.9 K  
 D1 1.00000000 se  
 TDO 1  
 SFO1 500.1330883 MH  
 NUC1 1H  
 P1 6.55 us  
 PLW1 19.01099968 W

F2 - Processing parameters  
 SI 65536  
 SF 500.1300123 MH  
 NDW EM  
 SSB 0  
 LB 0.30 Hz  
 GB 0  
 FC 1.00

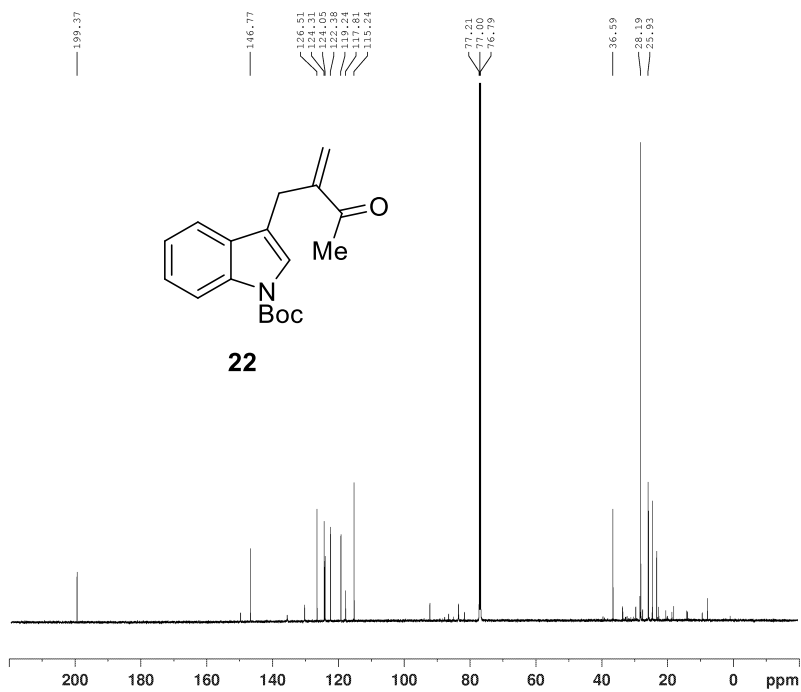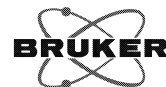

Current Data Parameters  
 NAME rjs-1246 Pure Carbon  
 EXPNO 1  
 PROCNO 1

F2 - Acquisition Parameters  
 Date\_ 20150406  
 Time 11.23  
 INSTRUM spect  
 FROBHD 5 mm CPQNP 1H/  
 PULPROG zgpg30  
 TD 65536  
 SOLVENT CDCl3  
 NS 54  
 DS 4  
 SWH 36057.691 Hz  
 FIDRES 0.550197 Hz  
 AQ 0.9087659 sec  
 RG 203  
 DW 13.867 usec  
 DE 18.00 usec  
 TE 298.1 K  
 D1 2.00000000 sec  
 D11 0.03000000 sec  
 TDO 1

===== CHANNEL f1 =====  
 SFO1 150.9178981 MHz  
 NUC1 13C  
 P1 11.00 usec  
 PLW1 30.00000000 W

===== CHANNEL f2 =====  
 SFO2 600.1324005 MHz  
 NUC2 1H  
 CPDPRG2 waltz16  
 PCPD2 80.00 usec  
 PLW2 9.00000000 W  
 PLW12 0.26587000 W  
 PLW13 0.17016000 W

F2 - Processing parameters  
 SI 32768  
 SF 150.9028152 MHz  
 WDW EM  
 SSB 0  
 LB 1.00 Hz  
 GB 0  
 FC 1.40

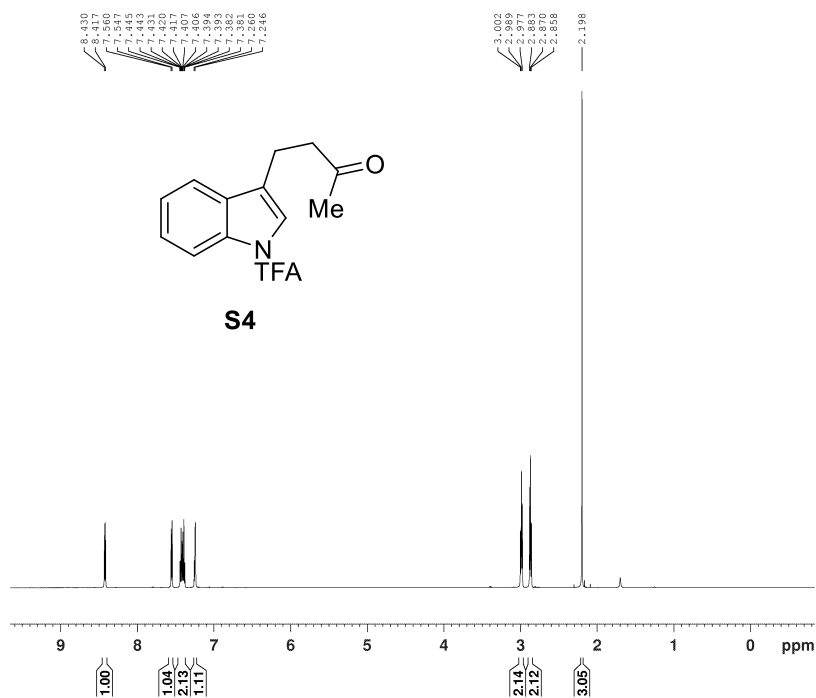

Current Data Parameters  
 NAME rjs-1261 Pure  
 EXPNO 1  
 PROCNO 1

F2 - Acquisition Parameter  
 Date\_ 20150418  
 Time 6.34  
 INSTRUM spect  
 PROBHD 5 mm CPQCI 1H/  
 PULPROG zg30  
 TD 65536  
 SOLVENT CDCl3  
 NS 8  
 DS 2  
 SWH 12019.230 Hz  
 FIDRES 0.183399 Hz  
 AQ 2.7262976 se  
 RG 32  
 DW 41.600 us  
 DE 10.00 us  
 TE 293.0 K  
 D1 1.00000000 se  
 TD0 1

==== CHANNEL f1 =====  
 SF01 600.1337060 MH  
 NUC1 1H  
 P1 10.15 us  
 PLW1 13.00000000 W

F2 - Processing parameters  
 SI 65536  
 SF 600.1300147 MH  
 WDW EM  
 SSB 0  
 LB 0.30 Hz  
 GB 0  
 FC 1.00

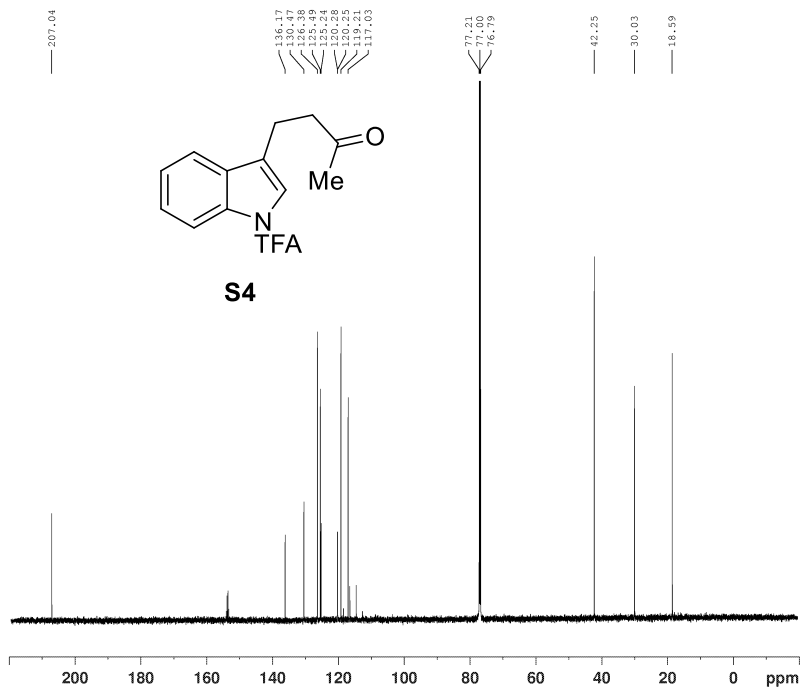

Current Data Parameters  
 NAME rjs-1261 Pure Carbon  
 EXPNO 1  
 PROCNO 1

F2 - Acquisition Parameters  
 Date\_ 20150418  
 Time 6.38  
 INSTRUM spect  
 PROBHD 5 mm CPQCI 1H/  
 PULPROG zgpg30  
 TD 65536  
 SOLVENT CDCl3  
 NS 46  
 DS 4  
 SWH 36057.691 Hz  
 FIDRES 0.550197 Hz  
 AQ 0.9087659 sec  
 RG 203  
 DW 13.867 usec  
 DE 18.00 usec  
 TE 293.0 K  
 D1 2.00000000 sec  
 D11 0.03000000 sec  
 TD0 1

==== CHANNEL f1 =====  
 SF01 150.9178981 MHz  
 NUC1 13C  
 P1 11.50 usec  
 PLW1 230.00000000 W

==== CHANNEL f2 =====  
 SF02 600.1324005 MHz  
 NUC2 1H  
 CPDPRG2 waltz16  
 PCPD2 90.00 usec  
 PLW2 13.00000000 W  
 PLW12 0.16534001 W  
 PLW13 0.13393000 W

F2 - Processing parameters  
 SI 32768  
 SF 150.9028184 MHz  
 WDW EM  
 SSB 0  
 LB 1.00 Hz  
 GB 0  
 FC 1.40



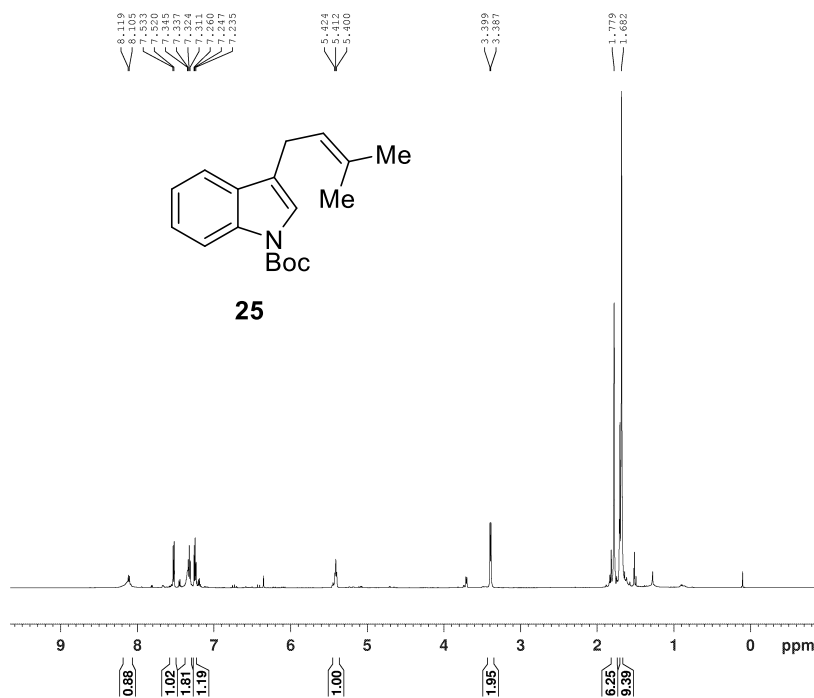

Current Data Parameters  
 NAME rjs-1270 Pure Prot  
 EXPNO 1  
 PROCNO 1

F2 - Acquisition Parameters  
 Date\_ 20150422  
 Time 6.41  
 INSTRUM spect  
 PROBHD 5 mm CPQCI 1H/  
 PULPROG zg30  
 TD 65536  
 SOLVENT CDCl3  
 NS 16  
 DS 2  
 SWH 12019.230 Hz  
 FIDRES 0.183399 Hz  
 AQ 2.7262976 sec  
 RG 12.7  
 DW 41.600 usec  
 DE 10.00 usec  
 TE 293.0 K  
 D1 1.00000000 sec  
 TDO 1

===== CHANNEL f1 =====  
 SF01 600.1337060 MHz  
 NUC1 1H  
 P1 10.15 usec  
 PLW1 13.00000000 w  
 F2 - Processing parameters  
 SI 65536  
 SF 600.1300139 MHz  
 WDW EM  
 SSB 0  
 LB 0.30 Hz  
 GB 0  
 PC 1.00

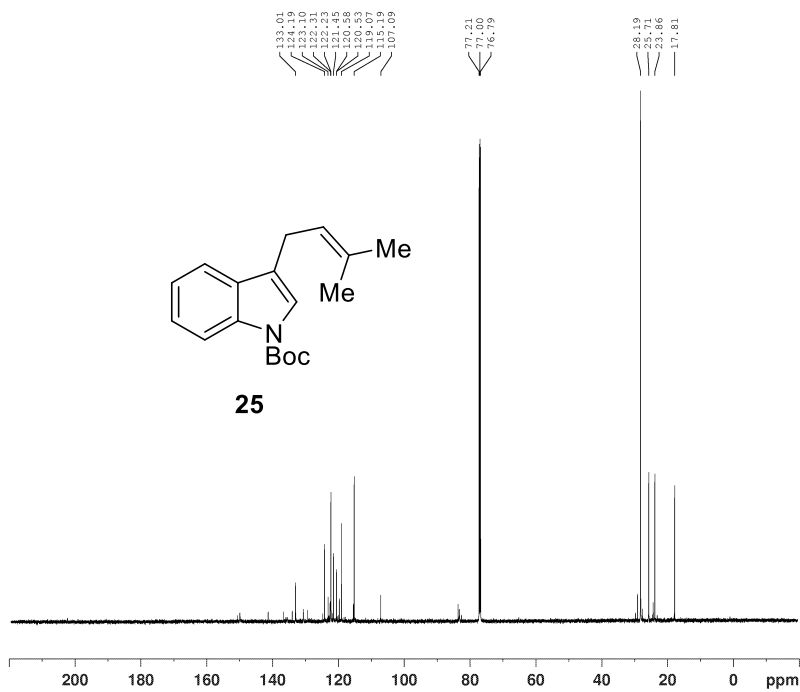

Current Data Parameters  
 NAME rjs-1270 Pure Carbon  
 EXPNO 1  
 PROCNO 1

F2 - Acquisition Parameters  
 Date\_ 20150422  
 Time 6.44  
 INSTRUM spect  
 PROBHD 5 mm CPQCI 1H/  
 PULPROG zgpg30  
 TD 65536  
 SOLVENT CDCl3  
 NS 47  
 DS 4  
 SWH 36057.691 Hz  
 FIDRES 0.550197 Hz  
 AQ 0.9087659 sec  
 RG 203  
 DW 13.867 usec  
 DE 18.00 usec  
 TE 293.0 K  
 D1 2.00000000 sec  
 D11 0.03000000 sec  
 TDO 1

===== CHANNEL f1 =====  
 SF01 150.9178981 MHz  
 NUC1 13C  
 P1 11.50 usec  
 PLW1 230.00000000 w  
 ===== CHANNEL f2 =====  
 SF02 600.1324005 MHz  
 NUC2 1H  
 CPDPRG2 waltz16  
 PCPD2 90.00 usec  
 PLW2 13.00000000 w  
 PLW12 0.16534001 w  
 PLW13 0.13393000 w

F2 - Processing parameters  
 SI 32768  
 SF 150.9028195 MHz  
 WDW EM  
 SSB 0  
 LB 1.00 Hz  
 GB 0  
 PC 1.40

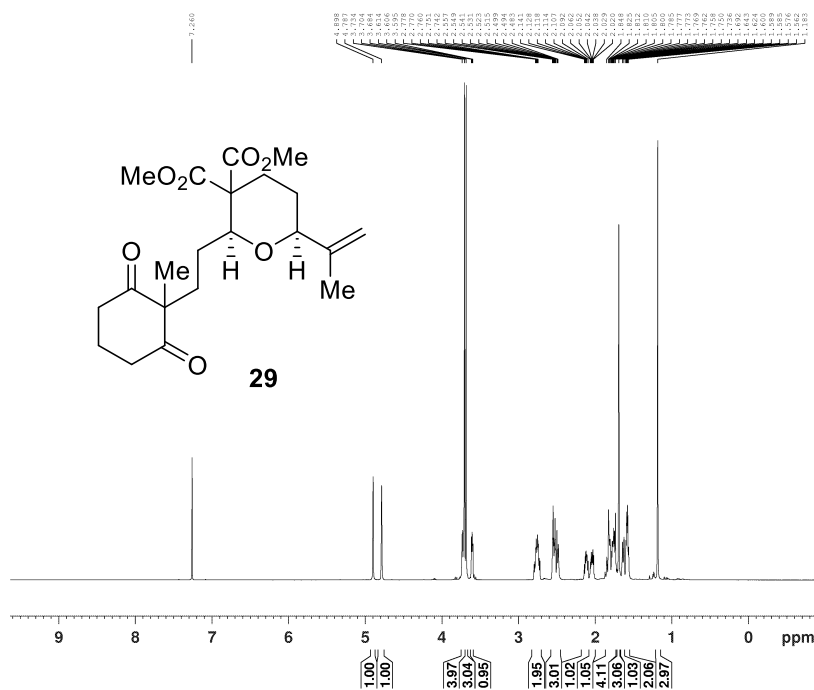

Current Data Parameters  
 NAME rjs-2495 Spot 1  
 EXPNO 1  
 PROCNO 1

F2 - Acquisition Parameter  
 Date\_ 20150307  
 Time 6.37  
 INSTRUM spect  
 PROBHD 5 mm CPQNP 1H/  
 PULPROG zg30  
 TD 65536  
 SOLVENT CDC13  
 NS 14  
 DS 2  
 SWH 12019.230 Hz  
 FIDRES 0.183399 Hz  
 AQ 2.7262976 se  
 RG 25.4  
 DW 41.600 us  
 DE 10.00 us  
 TE 298.1 K  
 D1 1.00000000 se  
 TD0 1

==== CHANNEL f1 =====  
 SFO1 600.1337060 MH  
 NUC1 1H  
 P1 13.00 us  
 PLW1 9.00000000 W

F2 - Processing parameters  
 SI 65536  
 SF 600.1300173 MH  
 WDW EM  
 SSB 0  
 LB 0.30 Hz  
 GB 0  
 PC 1.00

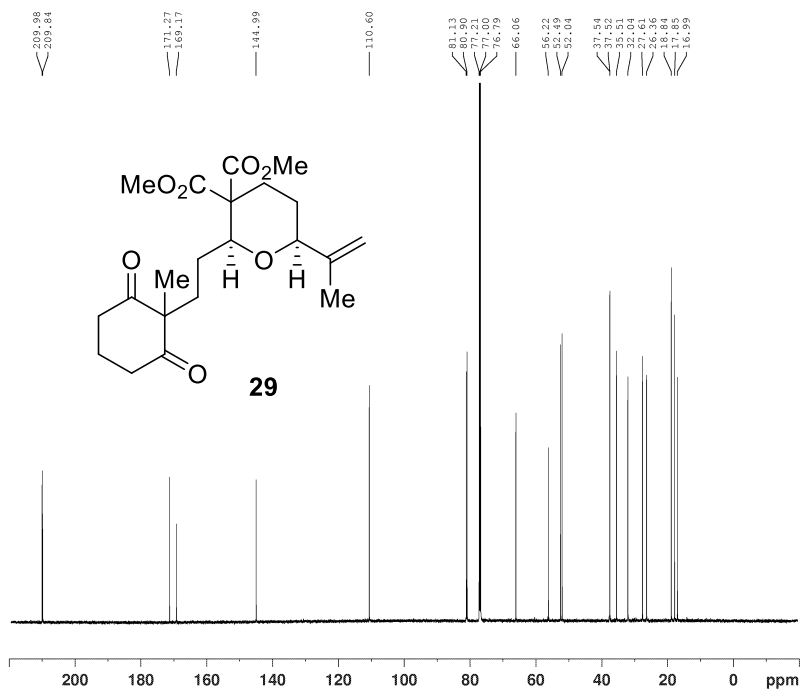

Current Data Parameters  
 NAME rjs-2495 Spot 1 Carbon  
 EXPNO 1  
 PROCNO 1

F2 - Acquisition Parameters  
 Date\_ 20150307  
 Time 6.42  
 INSTRUM spect  
 PROBHD 5 mm CPQNP 1H/  
 PULPROG zgpg30  
 TD 65536  
 SOLVENT CDC13  
 NS 49  
 DS 4  
 SWH 36057.691 Hz  
 FIDRES 0.550197 Hz  
 AQ 0.9087659 sec  
 RG 203  
 DW 13.867 usec  
 DE 18.00 usec  
 TE 298.2 K  
 D1 2.00000000 sec  
 D11 0.03000000 sec  
 TD0 1

==== CHANNEL f1 =====  
 SFO1 150.9178981 MHz  
 NUC1 13C  
 P1 11.00 usec  
 PLW1 30.00000000 W

==== CHANNEL f2 =====  
 SFO2 600.1324005 MHz  
 NUC2 1H  
 CPDPRG2 waltz16  
 PCPD2 80.00 usec  
 PLM2 9.00000000 W  
 PLM12 0.26587000 W  
 PLM13 0.17016000 W

F2 - Processing parameters  
 SI 32768  
 SF 150.9028184 MHz  
 WDW EM  
 SSB 0  
 LB 1.00 Hz  
 GB 0  
 PC 1.40

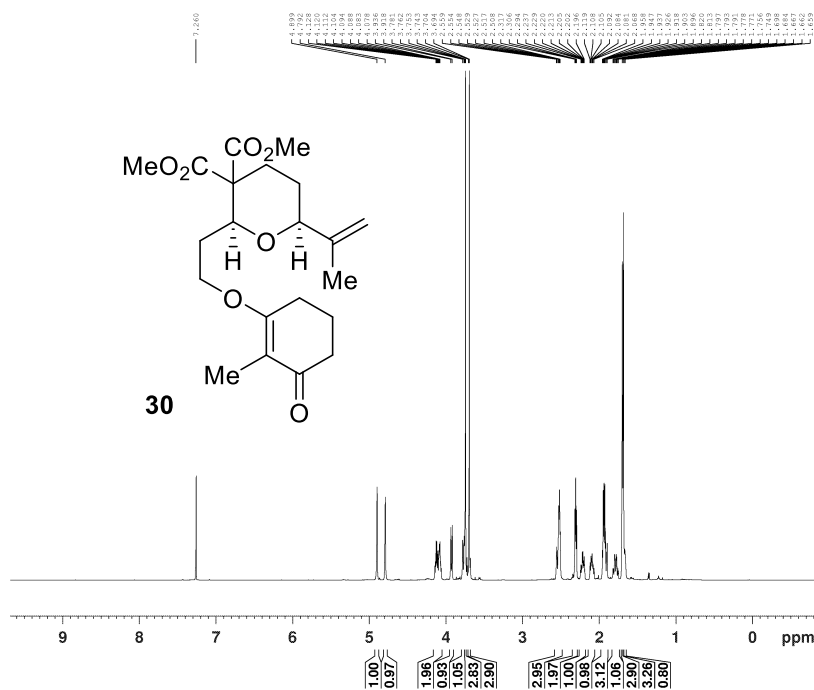

Current Data Parameters  
 NAME rjs-2495 Spot 2  
 EXPNO 1  
 PROCNO 1

F2 - Acquisition Parameter  
 Date\_ 20150307  
 Time 6.46  
 INSTRUM spect  
 PROBHD 5 mm CPQNP 1H/  
 PULPROG zg30  
 TD 65536  
 SOLVENT CDCl3  
 NS 17  
 DS 2  
 SWH 12019.230 Hz  
 FIDRES 0.183399 Hz  
 AQ 2.7262976 se  
 RG 22.6  
 DW 41.600 us  
 DE 10.00 us  
 TE 298.2 K  
 D1 1.00000000 se  
 TD0 1

==== CHANNEL f1 =====  
 SFO1 600.1337060 MH  
 NUC1 1H  
 P1 13.00 us  
 PLW1 9.00000000 W

F2 - Processing parameters  
 SI 65536  
 SF 600.1300171 MH  
 WDW EM  
 SSB 0  
 LB 0.30 Hz  
 GB 0  
 PC 1.00

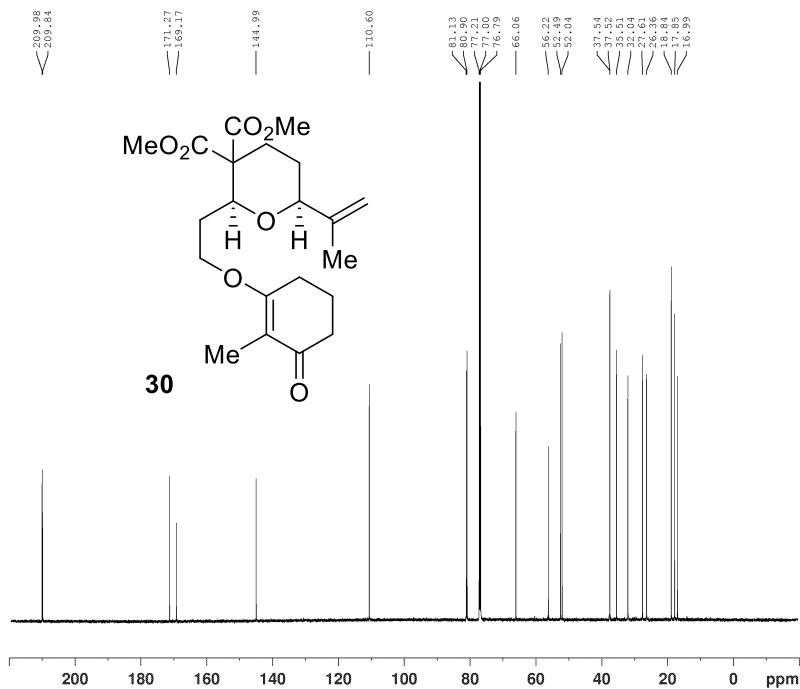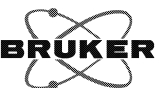

Current Data Parameters  
 NAME rjs-2495 Spot 1 Carbon  
 EXPNO 1  
 PROCNO 1

F2 - Acquisition Parameters  
 Date\_ 20150307  
 Time 6.42  
 INSTRUM spect  
 PROBHD 5 mm CPQNP 1H/  
 PULPROG zgpg30  
 TD 65536  
 SOLVENT CDCl3  
 NS 49  
 DS 4  
 SWH 36057.691 Hz  
 FIDRES 0.550197 Hz  
 AQ 0.9087659 sec  
 RG 203  
 DW 13.867 usec  
 DE 18.00 usec  
 TE 298.2 K  
 D1 2.00000000 sec  
 D11 0.03000000 sec  
 TD0 1

==== CHANNEL f1 =====  
 SFO1 150.9178981 MHZ  
 NUC1 13C  
 P1 11.00 usec  
 PLW1 30.00000000 W

==== CHANNEL f2 =====  
 SFO2 600.1324005 MHZ  
 NUC2 1H  
 CPDPRG2 waltz16  
 PCPD2 80.00 usec  
 PLW2 9.00000000 W  
 PLW12 0.26587000 W  
 PLW13 0.17016000 W

F2 - Processing parameters  
 SI 32768  
 SF 150.9028184 MHZ  
 WDW EM  
 SSB 0  
 LB 1.00 Hz  
 GB 0  
 PC 1.40

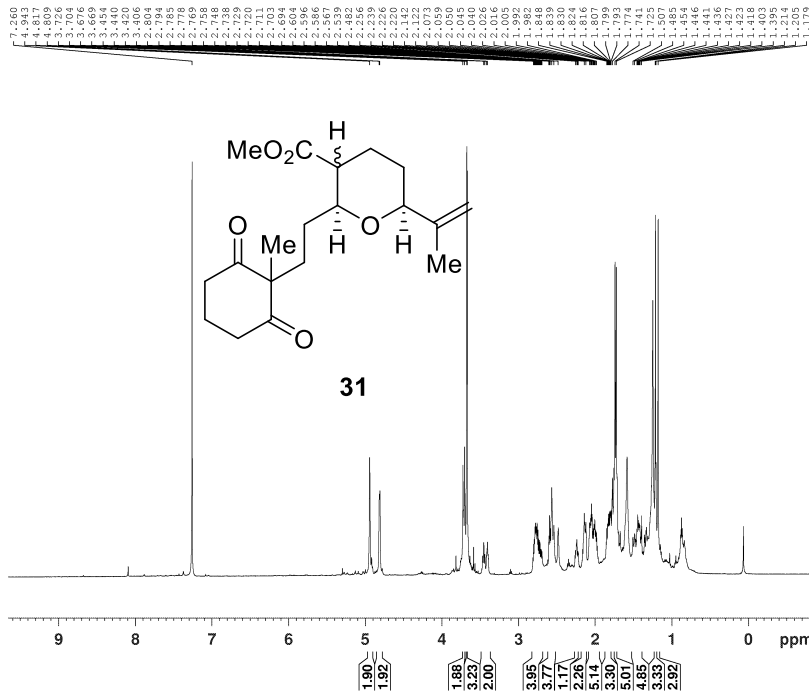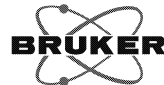

Current Data Parameters  
 NAME r3e-1238 Pure Upper Spc  
 EXENO  
 PROCNO 1

F2 - Acquisition Parameters  
 Date\_ 20150418  
 Time 6.06  
 INSTRUM spect  
 PROBUS 5 mm CPQCI 1H/  
 PULPROG zg30  
 TD 65536  
 SOLVENT CDCl3  
 NS 30  
 DS 4  
 SWH 12019.230 Hz  
 FIDRES 0.185393 Hz  
 AQ 2.7262976 sec  
 RG 18  
 DW 41.600 usec  
 DE 10.00 usec  
 TE 293.0 K  
 D1 1.00000000 sec  
 TDO 1

----- CHANNEL f1 -----  
 SF01 600.1324000 MHz  
 NUC1 1H  
 P1 10.15 usec  
 PLW1 13.00000000 W

F2 - Processing parameters  
 SI 65536  
 SF 600.1300148 MHz  
 WDM IN  
 SSB 0  
 LB 0.30 Hz  
 GB 0  
 PC 1.00

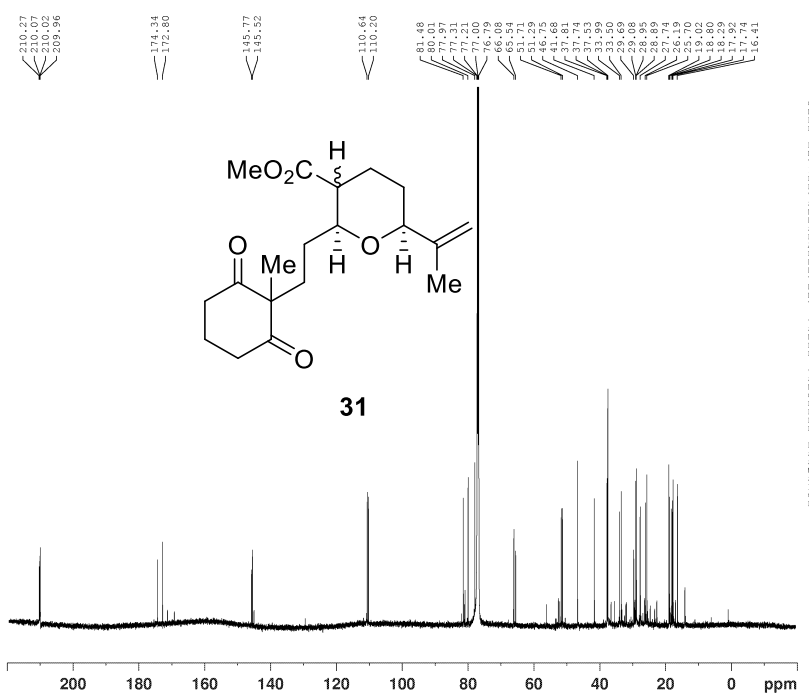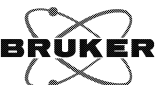

Current Data Parameters  
 NAME r3e-1238 Pure Carbon overnight  
 EXENO  
 PROCNO 1

F2 - Acquisition Parameters  
 Date\_ 20150417  
 Time 17.37  
 INSTRUM spect  
 PROBUS 5 mm CPQCI 1H/  
 PULPROG zgpg30  
 TD 65536  
 SOLVENT CDCl3  
 NS 15109  
 DS 4  
 SWH 36057.491 Hz  
 FIDRES 0.850197 Hz  
 AQ 0.3097659 sec  
 RG 203  
 DW 13.567 usec  
 DE 10.00 usec  
 TE 293.0 K  
 D1 2.00000000 sec  
 TDO 0.03000000 sec

----- CHANNEL f1 -----  
 SF01 150.9179981 MHz  
 NUC1 13C  
 P1 11.50 usec  
 PLW1 230.00000000 W

----- CHANNEL f2 -----  
 SF02 600.1324000 MHz  
 NUC2 1H  
 CPDPRG2 waltz16  
 PCD02 90.00 usec  
 PLW2 13.00000000 W  
 PLW12 0.14530001 W  
 PLW13 0.13393000 W

F2 - Processing parameters  
 SI 32768  
 SF 150.9026139 MHz  
 WDM IN  
 SSB 0  
 LB 1.00 Hz  
 GB 0  
 PC 1.40

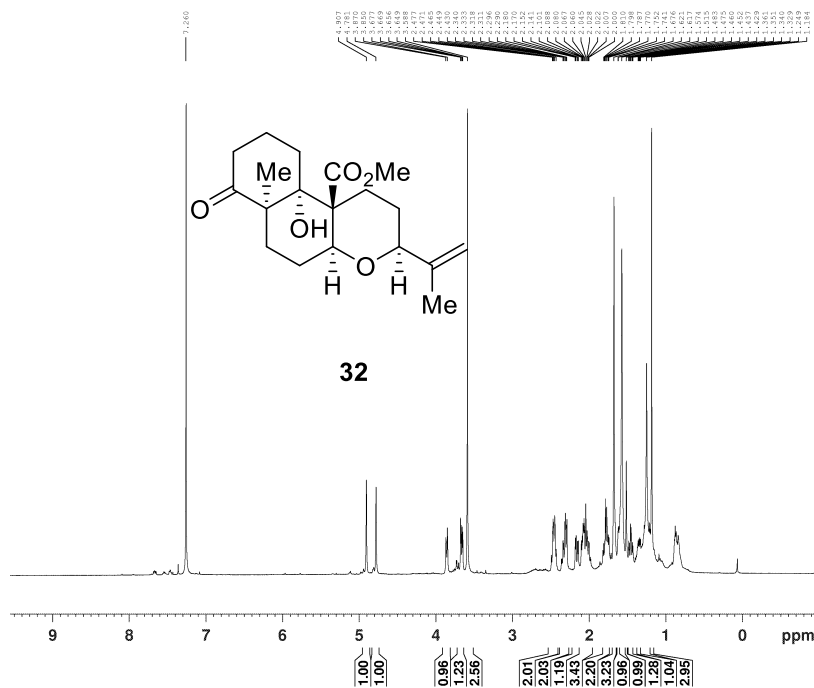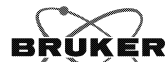

Current Data Parameters  
 NAME rjs-1216 Pure Lower Sp  
 EXPNO 1  
 PROCNO 1

F2 - Acquisition Parameters  
 Date\_ 20150416  
 Time 6:25  
 INSTRUM spect  
 PROBHD 5 mm CPQCI 1H/  
 PULPROG zg30  
 TD 65536  
 SOLVENT cnc13  
 NS 31  
 DS 2  
 SWH 12019.230 Hz  
 FIDRES 0.183399 Hz  
 AQ 2.726276 sec  
 RG 50.8  
 DW 41.600 usec  
 DE 10.00 usec  
 TE 293.0 K  
 D1 1.0000000 sec  
 TDO 1

\*\*\*\*\* CHANNEL f1 \*\*\*\*\*  
 SF01 600.137060 MHz  
 NUCL1 1H  
 P1 10.15 usec  
 PLW1 13.0000000 W

F2 - Processing parameters  
 SI 65536  
 SF 600.130148 MHz  
 WDW EM  
 SSB 0  
 LB 0.30 Hz  
 GB 0  
 PC 1.00

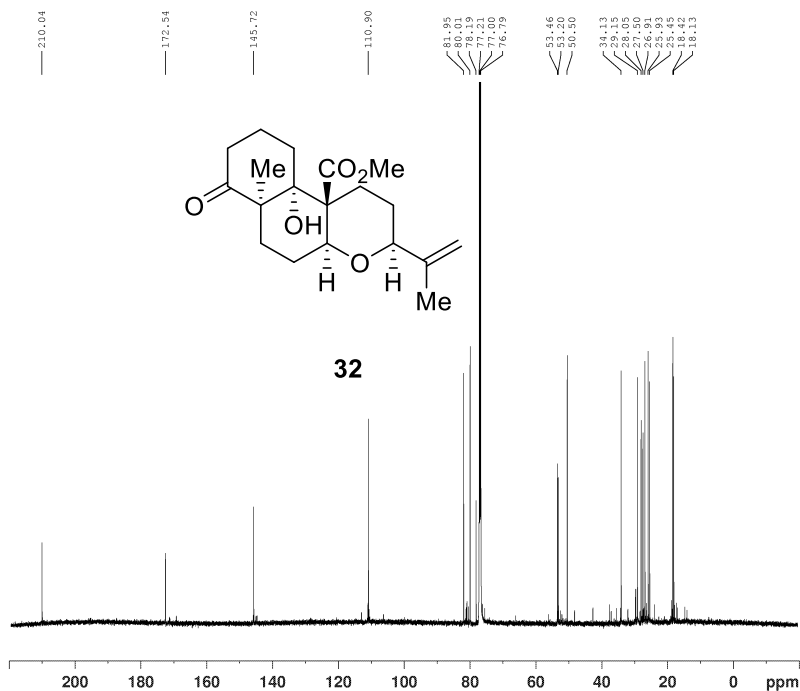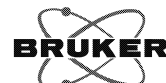

Current Data Parameters  
 NAME rjs-12-138-7-8 Pure Carbon  
 EXPNO 1  
 PROCNO 1

F2 - Acquisition Parameters  
 Date\_ 20130710  
 Time 6:46  
 INSTRUM spect  
 PROBHD 5 mm CPQNP 13/  
 PULPROG zgpg30  
 TD 65536  
 SOLVENT cnc13  
 NS 1538  
 DS 4  
 SWH 36097.691 Hz  
 FIDRES 0.550197 Hz  
 AQ 0.9087659 sec  
 RG 203  
 DW 13.867 usec  
 DE 18.00 usec  
 TE 298.0 K  
 D1 2.0000000 sec  
 D11 0.0300000 sec  
 TDO 1

\*\*\*\*\* CHANNEL f1 \*\*\*\*\*  
 SF01 150.9178981 MHz  
 NUCL1 13C  
 P1 10.75 usec  
 PLW1 30.0000000 W

\*\*\*\*\* CHANNEL f2 \*\*\*\*\*  
 SF02 600.1324005 MHz  
 NUCL2 1H  
 CPDPRG2 waltz16  
 PCPDZ 80.00 usec  
 PLW2 9.0000000 W  
 PLW3 0.27562001 W  
 PLW4 0.17640001 W

F2 - Processing parameters  
 SI 32768  
 SF 150.9028140 MHz  
 WDW EM  
 SSB 0  
 LB 1.00 Hz  
 GB 0  
 PC 1.40

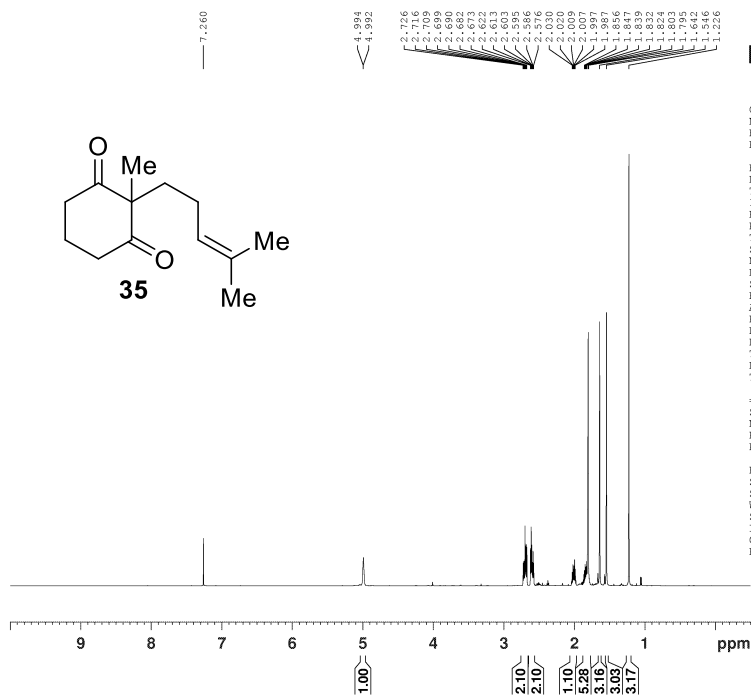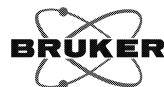

Current Data Parameters  
 NAME rjs-0752 Pure  
 EXPNO 1  
 PROCNO 1

F2 - Acquisition Parameters  
 Date\_ 20150114  
 Time 14.51  
 INSTRUM spect  
 PROBHD 5 mm CPQNP 1H/  
 PULPROG zg30  
 TD 65536  
 SOLVENT CDCl3  
 NS 20  
 DS 2  
 SWH 12019.230 Hz  
 FIDRES 0.183399 Hz  
 AQ 2.7262976 sec  
 RG 32  
 DW 41.600 usec  
 DE 10.00 usec  
 TE 298.1 K  
 D1 1.00000000 sec  
 TD0 1

===== CHANNEL f1 =====  
 SF01 600.1337060 MHz  
 NUC1 1H  
 P1 13.00 usec  
 PLW1 9.00000000 W

F2 - Processing parameters  
 SI 65536  
 SF 600.1300150 MHz  
 WDW EM  
 SSB 0  
 LB 0.30 Hz  
 GB 0  
 PC 1.00

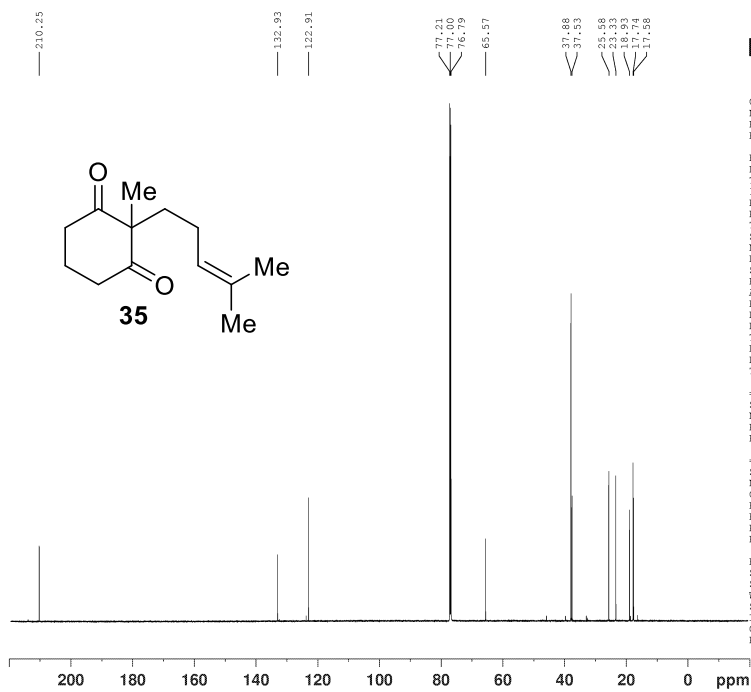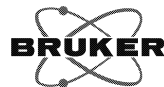

Current Data Parameters  
 NAME rjs-0752 Pure Carbon  
 EXPNO 1  
 PROCNO 1

F2 - Acquisition Parameters  
 Date\_ 20150114  
 Time 14.56  
 INSTRUM spect  
 PROBHD 5 mm CPQNP 1H/  
 PULPROG zgpg30  
 TD 65536  
 SOLVENT CDCl3  
 NS 49  
 DS 4  
 SWH 36057.691 Hz  
 FIDRES 0.550197 Hz  
 AQ 0.9087659 sec  
 RG 203  
 DW 13.867 usec  
 DE 18.00 usec  
 TE 298.0 K  
 D1 2.00000000 sec  
 D11 0.03000000 sec  
 TD0 1

===== CHANNEL f1 =====  
 SF01 150.9178981 MHz  
 NUC1 13C  
 P1 11.00 usec  
 PLW1 30.00000000 W

===== CHANNEL f2 =====  
 SF02 600.1324005 MHz  
 NUC2 1H  
 CPDPRG2 waltz16  
 PCPD2 80.00 usec  
 PLW2 9.00000000 W  
 PLW12 0.36587000 W  
 PLW13 0.17016000 W

F2 - Processing parameters  
 SI 32768  
 SF 150.9028147 MHz  
 WDW EM  
 SSB 0  
 LB 1.00 Hz  
 GB 0  
 PC 1.40

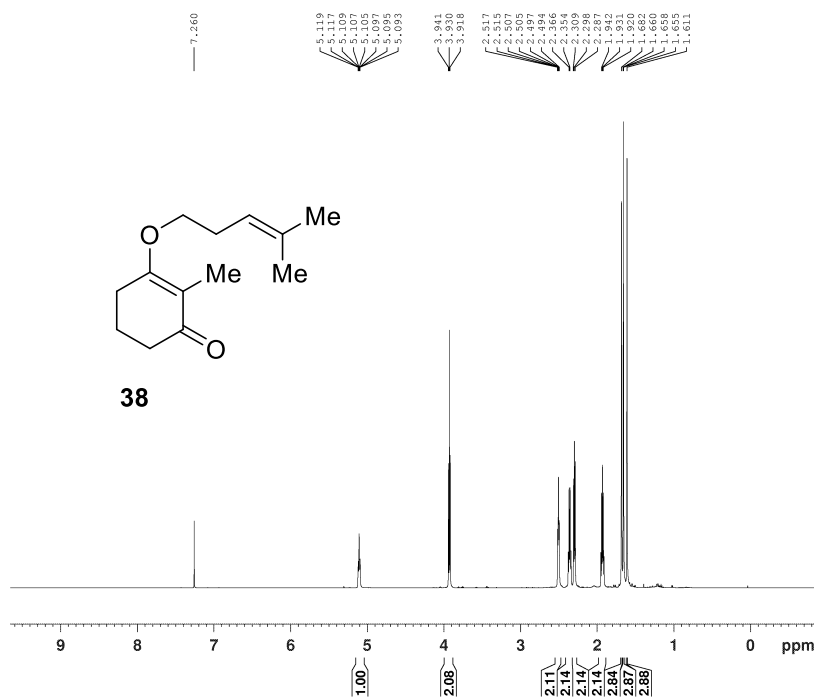

Current Data Parameters  
 NAME rjs-1212  
 EXPNO 1  
 PROCNO 1

F2 - Acquisition Parameter  
 Date\_ 20150313  
 Time 12.47  
 INSTRUM spect  
 PROBRD 5 mm CPQNP 1H/  
 PULPROG zg30  
 TD 65536  
 SOLVENT CDC13  
 NS 16  
 DS 2  
 SWH 12019.230 Hz  
 FIDRES 0.183399 Hz  
 AQ 2.7262976 se  
 RG 18  
 DW 41.600 us  
 DE 10.00 us  
 TE 298.1 K  
 D1 1.00000000 se  
 TD0 1

==== CHANNEL f1 =====  
 SF01 600.1337060 MH  
 NUC1 1H  
 P1 13.00 us  
 PLW1 9.00000000 W

F2 - Processing parameters  
 SI 65536  
 SF 600.1300196 MH  
 WDW EM  
 SSB 0  
 LB 0.30 Hz  
 GB 0  
 PC 1.00

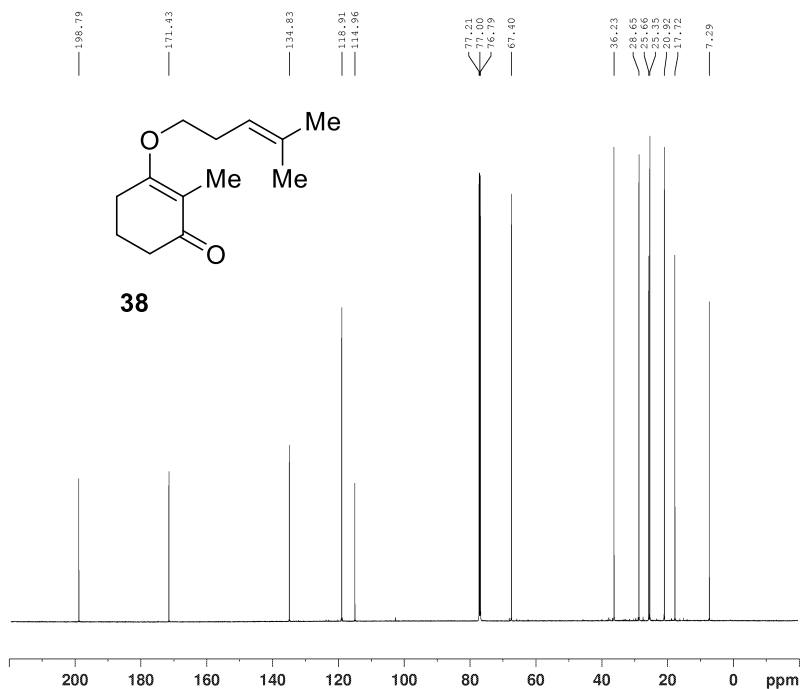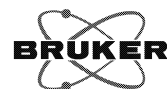

Current Data Parameters  
 NAME rjs-1212  
 EXPNO 2  
 PROCNO 1

F2 - Acquisition Parameters  
 Date\_ 20150313  
 Time 13.00  
 INSTRUM spect  
 PROBRD 5 mm CPQNP 1H/  
 PULPROG zgpg30  
 TD 65536  
 SOLVENT CDC13  
 NS 256  
 DS 4  
 SWH 36057.691 Hz  
 FIDRES 0.350197 Hz  
 AQ 0.9087659 sec  
 RG 203  
 DW 13.867 usec  
 DE 18.00 usec  
 TE 298.2 K  
 D1 2.00000000 sec  
 D11 0.03000000 sec  
 TD0 1

==== CHANNEL f1 =====  
 SF01 150.9178961 MHZ  
 NUC1 13C  
 P1 11.00 usec  
 PLW1 30.00000000 W

==== CHANNEL f2 =====  
 SF02 600.1324005 MHZ  
 NUC2 1H  
 CPDPRG[2] waltz16  
 PCPD2 80.00 usec  
 PLW2 9.00000000 W  
 PLM12 0.26587000 W  
 PLM13 0.17016000 W

F2 - Processing parameters  
 SI 32768  
 SF 150.9028239 MHZ  
 WDW EM  
 SSB 0  
 LB 1.00 Hz  
 GB 0  
 PC 1.40

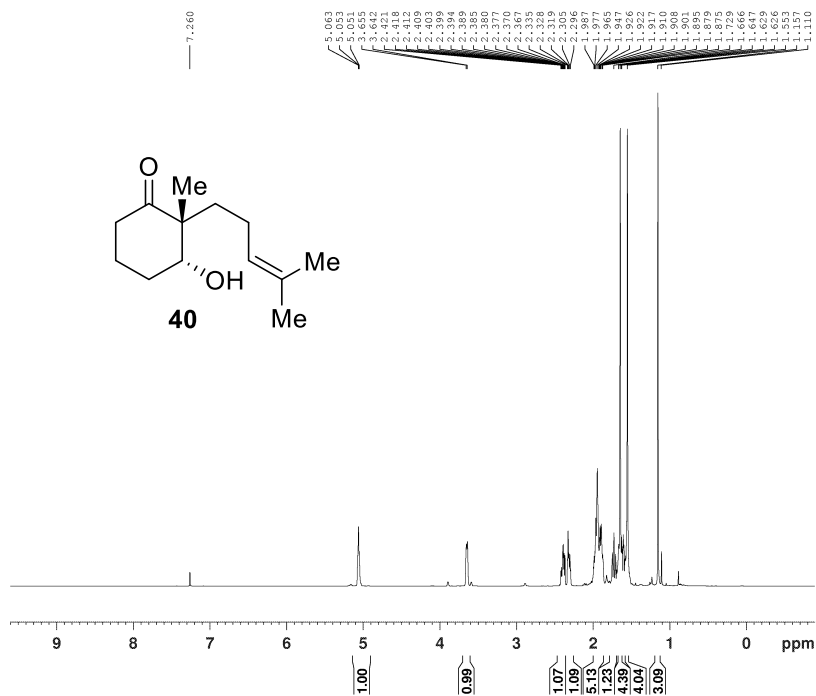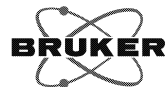

Current Data Parameters  
 NAME rjs-1202 Pure  
 EXPNO 1  
 PROCNO 1

F2 - Acquisition Parameter  
 Date\_ 20150307  
 Time 7.48  
 INSTRUM spect  
 PROBHD 5 mm CPQNP 1H/  
 PULPROG zg30  
 TD 65536  
 SOLVENT CDCl3  
 NS 16  
 DS 2  
 SWH 12019.230 Hz  
 FIDRES 0.183399 Hz  
 AQ 2.7262976 se  
 RG 22.6  
 DW 41.600 us  
 DE 10.00 us  
 TE 298.2 K  
 D1 1.00000000 se  
 TD0 1

==== CHANNEL f1 =====  
 SF01 600.1337060 MH  
 NUC1 1H  
 P1 13.00 us  
 PLW1 9.00000000 W

F2 - Processing parameters  
 SI 65536  
 SF 600.1300174 MH  
 WDW EM  
 SSB 0  
 LB 0.30 Hz  
 GB 0  
 FC 1.00

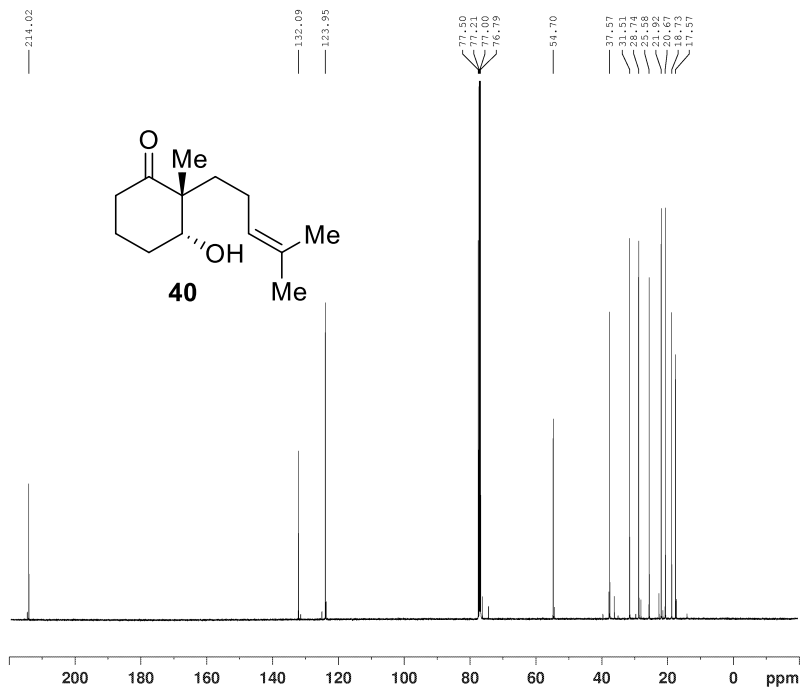

Current Data Parameters  
 NAME rjs-1202 Pure Carbon  
 EXPNO 1  
 PROCNO 1

F2 - Acquisition Parameters  
 Date\_ 20150307  
 Time 7.50  
 INSTRUM spect  
 PROBHD 5 mm CPQNP 1H/  
 PULPROG zgpg30  
 TD 65536  
 SOLVENT CDCl3  
 NS 66  
 DS 4  
 SWH 36057.691 Hz  
 FIDRES 0.550197 Hz  
 AQ 0.9087659 sec  
 RG 203  
 DW 13.867 usec  
 DE 18.00 usec  
 TE 298.1 K  
 D1 2.00000000 sec  
 D11 0.03000000 sec  
 TD0 1

==== CHANNEL f1 =====  
 SF01 150.9178981 MHz  
 NUC1 13C  
 P1 11.00 usec  
 PLW1 30.00000000 W

==== CHANNEL f2 =====  
 SF02 600.1324005 MHz  
 NUC2 1H  
 CPDPRG2 waltz16  
 FPCD2 80.00 usec  
 PLW2 9.00000000 W  
 PLW12 0.26587000 W  
 PLW13 0.17016000 W

F2 - Processing parameters  
 SI 32768  
 SF 150.9028185 MHz  
 WDW EM  
 SSB 0  
 LB 1.00 Hz  
 GB 0  
 FC 1.40



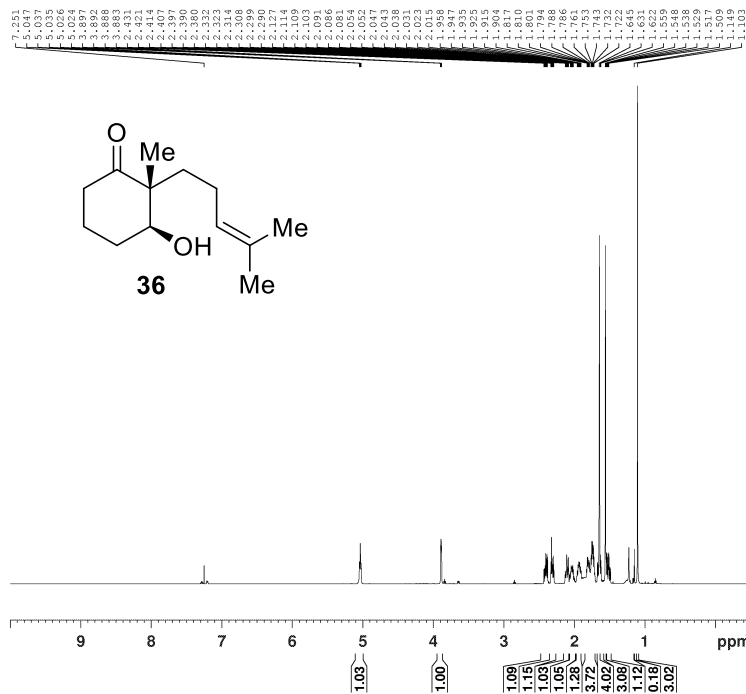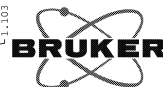

Current Data Parameters  
 NAME rjs-0756 Pure proton  
 EXPNO 1  
 PROCNO 1  
 F2 - Acquisition Parameters  
 Date\_ 20150117  
 Time 6.19  
 INSTRUM spect  
 PROBHD 5 mm CPQNP 1H/  
 PULPROG zg30  
 TD 65536  
 SOLVENT CDCl3  
 NS 21  
 DS 2  
 SWH 12019.230 Hz  
 FIDRES 0.183399 Hz  
 AQ 2.7262976 sec  
 RG 22.6  
 DW 41.600 usec  
 DE 10.00 usec  
 TE 298.0 K  
 DI 1.0000000 sec  
 TDO 1  
 ===== CHANNEL f1 =====  
 SF01 600.1337060 MHz  
 NUC1 1H  
 P1 13.00 usec  
 PLW1 9.0000000 W  
 F2 - Processing parameters  
 SI 65536  
 SF 600.1300212 MHz  
 WDW EM  
 SSB 0 0.30 Hz  
 LB 0  
 GB 0  
 PC 1.00

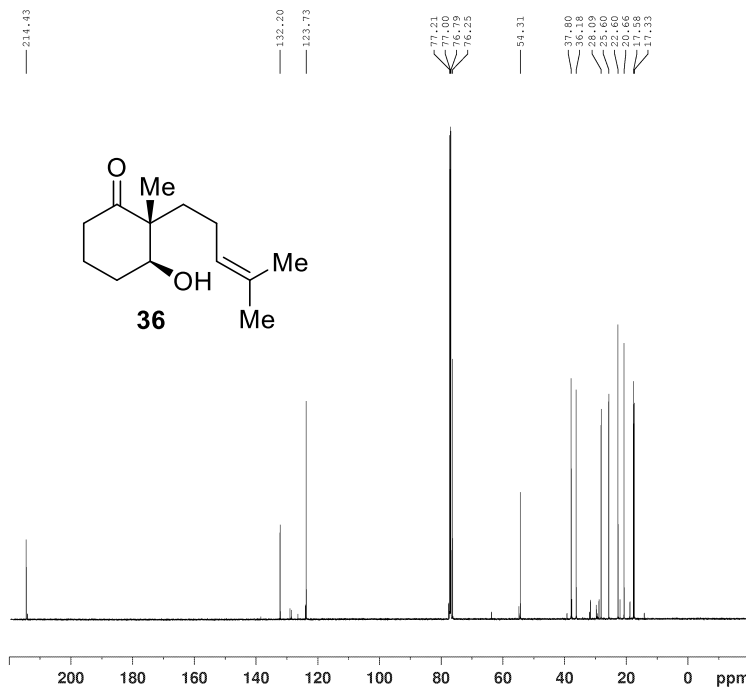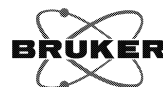

Current Data Parameters  
 NAME rjs-0756 Pure Carbon  
 EXPNO 1  
 PROCNO 1  
 F2 - Acquisition Parameters  
 Date\_ 20150117  
 Time 6.27  
 INSTRUM spect  
 PROBHD 5 mm CPQNP 1H/  
 PULPROG zgpg30  
 TD 65536  
 SOLVENT CDCl3  
 NS 76  
 DS 4  
 SWH 36057.691 Hz  
 FIDRES 0.550197 Hz  
 AQ 0.9087659 sec  
 RG 203  
 DW 13.867 usec  
 DE 18.00 usec  
 TE 298.1 K  
 D1 2.0000000 sec  
 D11 0.0300000 sec  
 TDO 1  
 ===== CHANNEL f1 =====  
 SF01 150.9178981 MHz  
 NUC1 13C  
 P1 11.00 usec  
 PLW1 30.0000000 W  
 ===== CHANNEL f2 =====  
 SF02 600.1324005 MHz  
 NUC2 1H  
 CPDPRG2 waltz16  
 PCPD2 80.00 usec  
 PLW2 9.0000000 W  
 PLW12 0.36587000 W  
 PLW13 0.17016000 W  
 F2 - Processing parameters  
 SI 32768  
 SF 150.9028173 MHz  
 WDW EM  
 SSB 0  
 LB 1.00 Hz  
 GB 0  
 PC 1.40

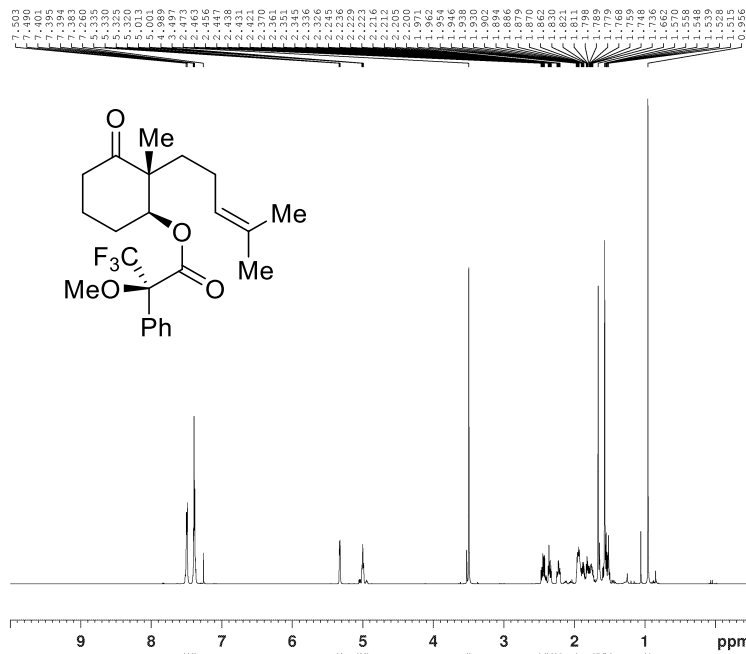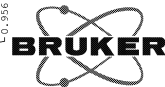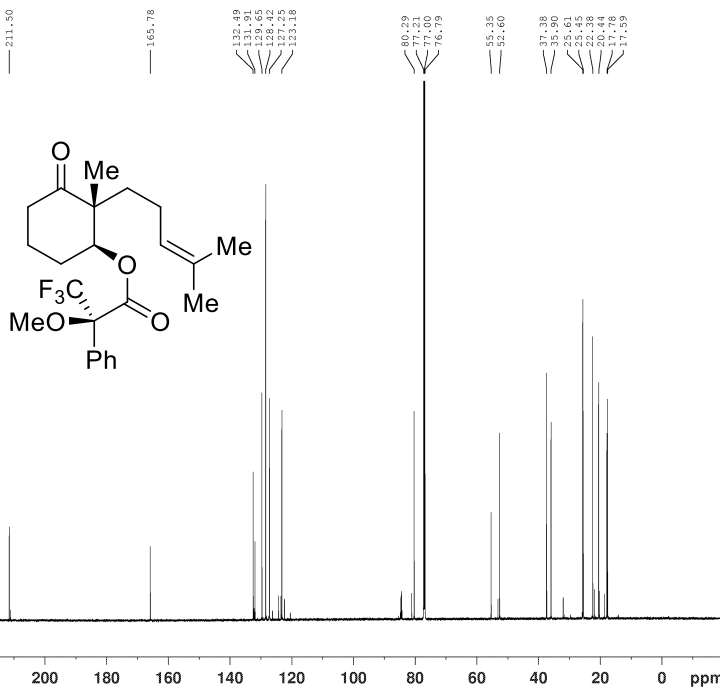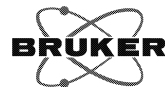

**<sup>19</sup>F NMR spectrum of Mosher Ester of 36.**

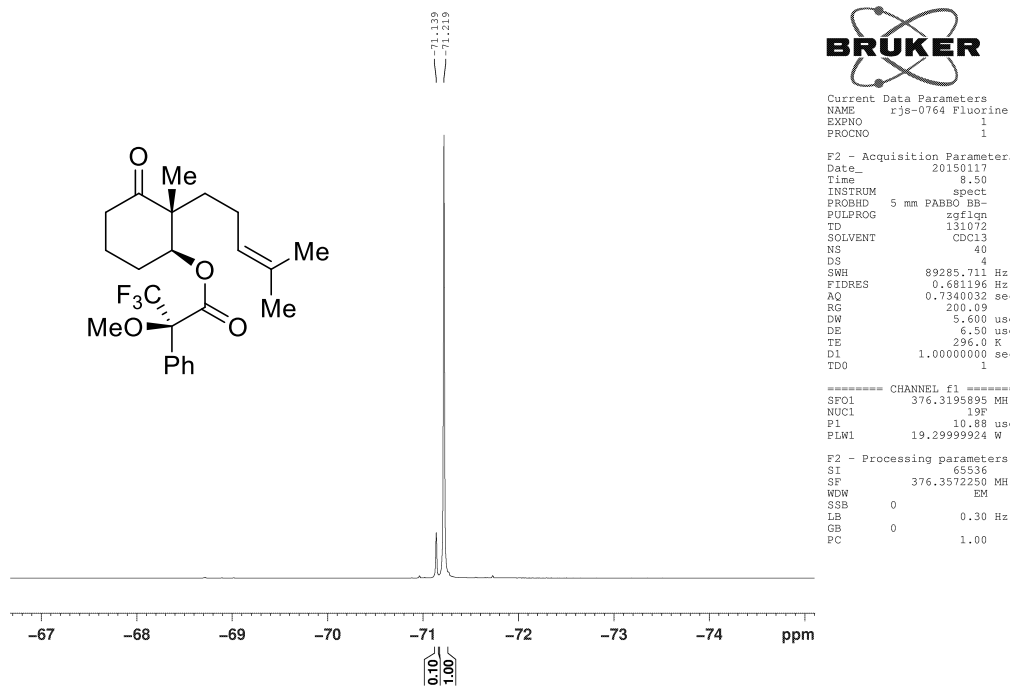

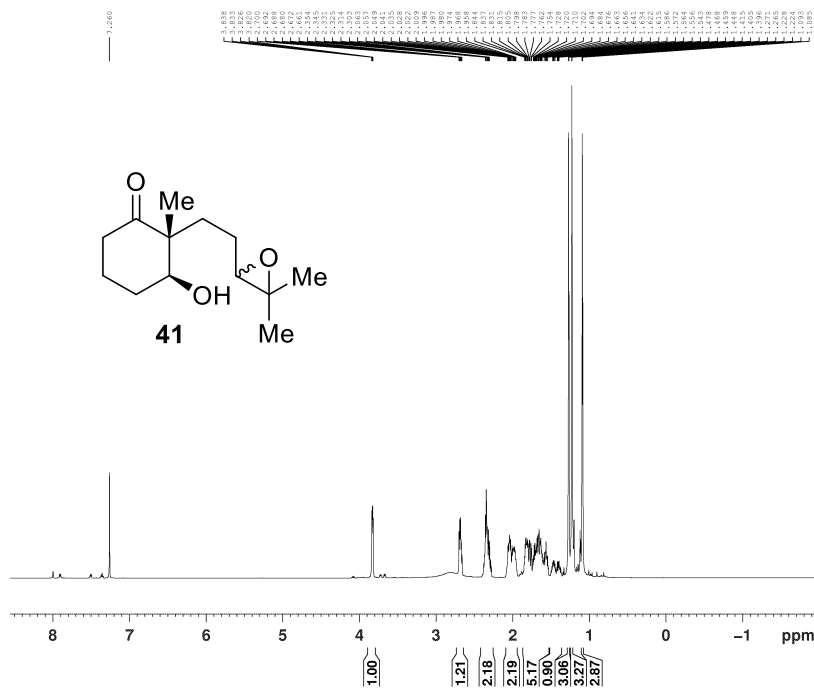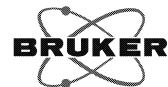

Current Data Parameters  
 NAME rjs-1265 Pure  
 EXPNO 1  
 PROCNO 1

F2 - Acquisition Parameter  
 Date\_ 20150418  
 Time 6.27  
 INSTRUM spect  
 PROBHD 5 mm CPQCI 1H/  
 PULPROG zg30  
 TD 65536  
 SOLVENT CDCl3  
 NS 11  
 DS 2  
 SWH 12019.230 Hz  
 FIDRES 0.183399 Hz  
 AQ 2.7262976 se  
 RG 14.2  
 DW 41.600 us  
 DE 10.00 us  
 TE 293.0 K  
 D1 1.00000000 se  
 TD0 1

===== CHANNEL f1 =====  
 SFO1 600.1337060 MH  
 NUC1 1H  
 P1 10.15 us  
 PLW1 13.00000000 W

F2 - Processing parameters  
 SI 65536  
 SF 600.1300141 MH  
 WDW EM  
 SSB 0  
 LB 0.30 Hz  
 GB 0  
 FC 1.00

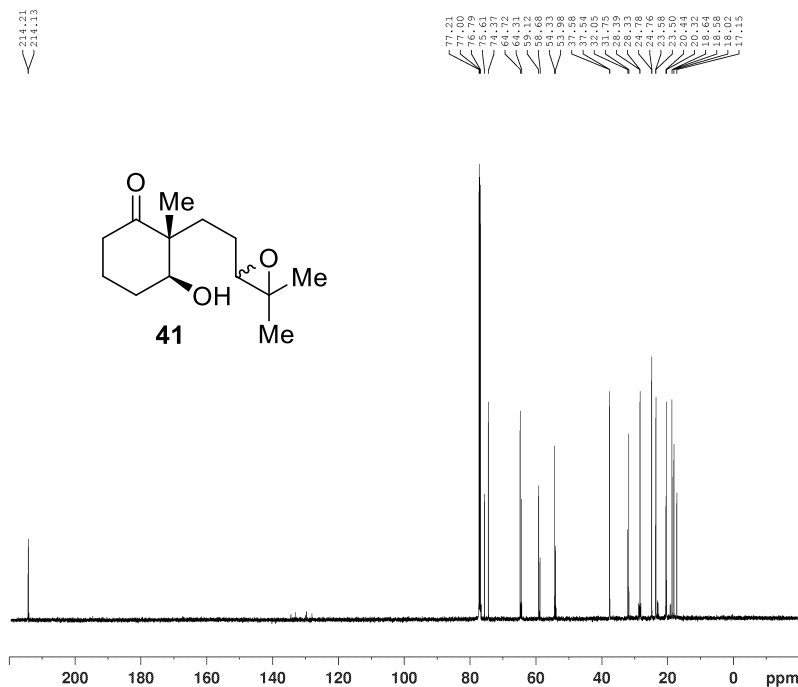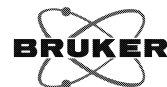

Current Data Parameters  
 NAME rjs-1265 Pure Carbon  
 EXPNO 1  
 PROCNO 1

F2 - Acquisition Parameters  
 Date\_ 20150418  
 Time 6.30  
 INSTRUM spect  
 PROBHD 5 mm CPQCI 1H/  
 PULPROG zgpg30  
 TD 65536  
 SOLVENT CDCl3  
 NS 55  
 DS 4  
 SWH 36057.691 Hz  
 FIDRES 0.550197 Hz  
 AQ 0.9087659 sec  
 RG 203  
 DW 13.867 usec  
 DE 18.00 usec  
 TE 293.0 K  
 D1 2.00000000 sec  
 D11 0.03000000 sec  
 TD0 1

===== CHANNEL f1 =====  
 SFO1 150.9178981 MHz  
 NUC1 13C  
 P1 11.50 usec  
 PLW1 230.00000000 W

===== CHANNEL f2 =====  
 SFO2 600.1324005 MHz  
 NUC2 1H  
 CFPDPRG2 waltz16  
 FCPD2 90.00 usec  
 PLW2 13.00000000 W  
 PLW12 0.16534001 W  
 PLW13 0.13393000 W

F2 - Processing parameters  
 SI 32768  
 SF 150.9028228 MHz  
 WDW EM  
 SSB 0  
 LB 1.00 Hz  
 GB 0  
 FC 1.40

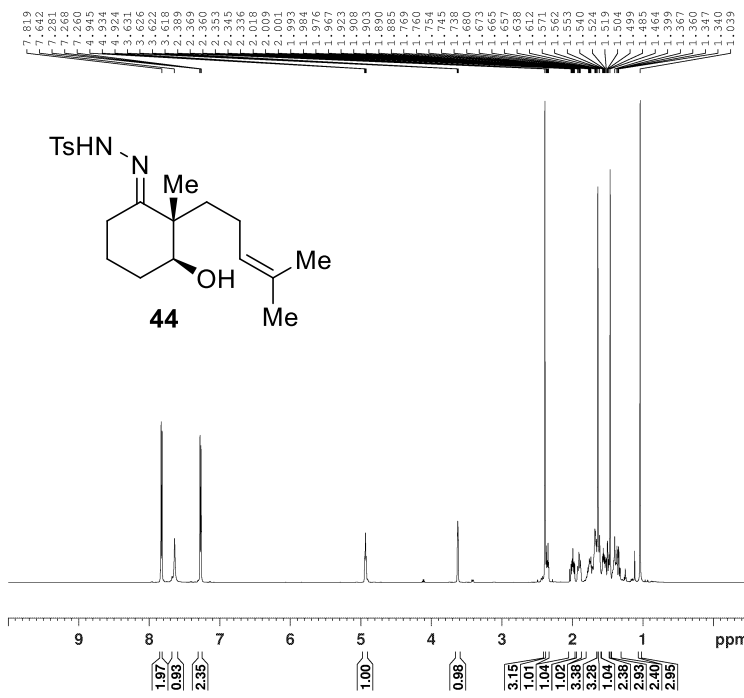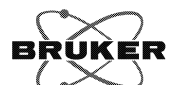

Current Data Parameters  
 NAME rjs-0755 Pure  
 EXPNO 1  
 PROCNO 1

F2 - Acquisition Parameters  
 Date\_ 20150115  
 Time 6.14  
 INSTRUM spect  
 PROBHD 5 mm CPQNP 1H/  
 PULPROG zg30  
 TD 65536  
 SOLVENT CDCl3  
 NS 20  
 DS 2  
 SWH 12019.230 Hz  
 FIDRES 0.183399 Hz  
 AQ 2.7262976 sec  
 RG 32  
 DW 41.600 usec  
 DE 10.00 usec  
 TE 298.0 K  
 D1 1.00000000 sec  
 TD0 1

===== CHANNEL f1 =====  
 SF01 600.1337060 MHz  
 NUC1 1H  
 P1 13.00 usec  
 PLW1 9.00000000 W

F2 - Processing parameters  
 SI 65536  
 SF 600.1300149 MHz  
 WDW EM  
 SSB 0  
 LB 0.30 Hz  
 GB 0  
 PC 1.00

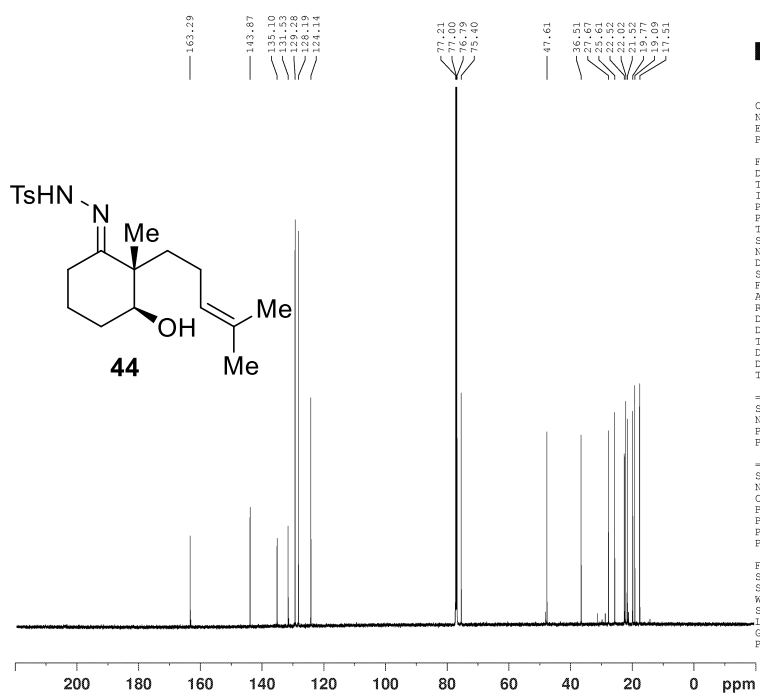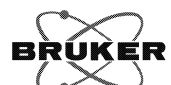

Current Data Parameters  
 NAME rjs-0755 Pure Carbon  
 EXPNO 1  
 PROCNO 1

F2 - Acquisition Parameters  
 Date\_ 20150115  
 Time 6.18  
 INSTRUM spect  
 PROBHD 5 mm CPQNP 1H/  
 PULPROG zgpg30  
 TD 65536  
 SOLVENT CDCl3  
 NS 54  
 DS 4  
 SWH 36057.691 Hz  
 FIDRES 0.550197 Hz  
 AQ 0.9087659 sec  
 RG 203  
 DW 13.867 usec  
 DE 18.00 usec  
 TE 298.1 K  
 D1 2.00000000 sec  
 D11 0.03000000 sec  
 TD0 1

===== CHANNEL f1 =====  
 SF01 150.9178981 MHz  
 NUC1 13C  
 P1 11.00 usec  
 PLW1 30.00000000 W

===== CHANNEL f2 =====  
 SF02 600.1324005 MHz  
 NUC2 1H  
 CPDPRG2 waltz16  
 PCPD2 80.00 usec  
 PLW2 9.00000000 W  
 PLW12 0.36587000 W  
 PLW13 0.17016000 W

F2 - Processing parameters  
 SI 32768  
 SF 150.9028173 MHz  
 WDW EM  
 SSB 0  
 LB 1.00 Hz  
 GB 0  
 PC 1.40

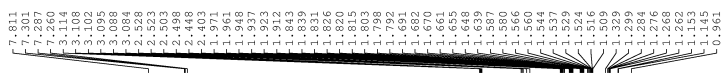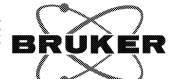

Current Data Parameters  
 NAME rjs-0761 pure  
 EXPNO 1  
 PROCNO 1

F2 - Acquisition Parameters  
 Date\_ 20150116  
 Time 10.24  
 INSTRUM spect  
 PROBHD 5 mm CPQNP 1H/  
 PULPROG zg30  
 TD 65536  
 SOLVENT CDCl3  
 NS 29  
 DS 2  
 SWH 12019.230 Hz  
 FIDRES 0.183399 Hz  
 AQ 2.7262976 sec  
 RG 22.6  
 DW 41.600 usec  
 DE 10.00 usec  
 TE 298.0 K  
 D1 1.00000000 sec  
 TD0 1

===== CHANNEL f1 =====  
 SF01 600.1337060 MHz  
 NUC1 1H  
 P1 13.00 usec  
 PLW1 9.00000000 W

F2 - Processing parameters  
 SI 65536  
 SF 600.1300154 MHz  
 WDW EM  
 SSB 0  
 LB 0.30 Hz  
 GB 0  
 PC 1.00

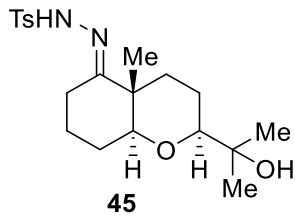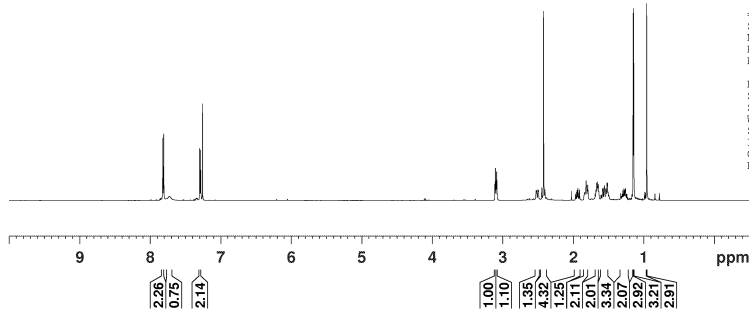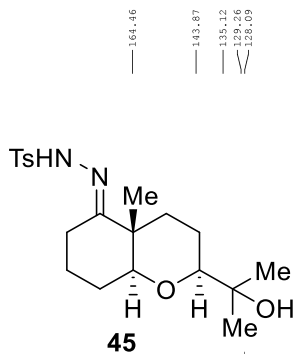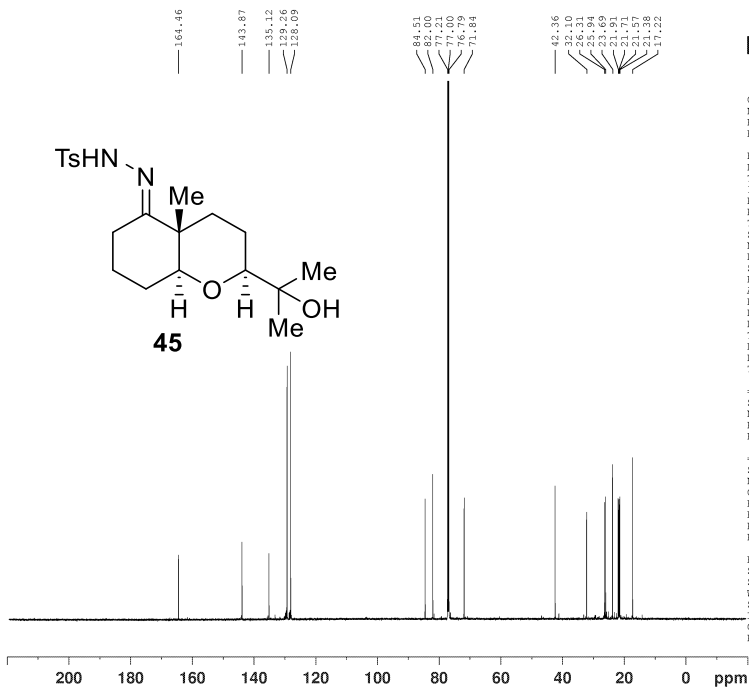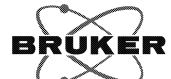

Current Data Parameters  
 NAME rjs-0761 pure carbon  
 EXPNO 1  
 PROCNO 1

F2 - Acquisition Parameters  
 Date\_ 20150116  
 Time 10.28  
 INSTRUM spect  
 PROBHD 5 mm CPQNP 1H/  
 PULPROG zgpg30  
 TD 65536  
 SOLVENT CDCl3  
 NS 49  
 DS 4  
 SWH 36057.691 Hz  
 FIDRES 0.550197 Hz  
 AQ 0.9087659 sec  
 RG 203  
 DW 13.867 usec  
 DE 18.00 usec  
 TE 298.0 K  
 D1 2.00000000 sec  
 D11 0.03000000 sec  
 TD0 1

===== CHANNEL f1 =====  
 SF01 150.9178981 MHz  
 NUC1 13C  
 P1 11.00 usec  
 PLW1 30.00000000 W

===== CHANNEL f2 =====  
 SF02 600.1324005 MHz  
 NUC2 1H  
 CPDPRG2 waltz16  
 PCPD2 80.00 usec  
 PLW2 9.00000000 W  
 PLW12 0.36387000 W  
 PLW13 0.17016000 W

F2 - Processing parameters  
 SI 32768  
 SF 150.9028195 MHz  
 WDW EM  
 SSB 0  
 LB 1.00 Hz  
 GB 0  
 PC 1.40

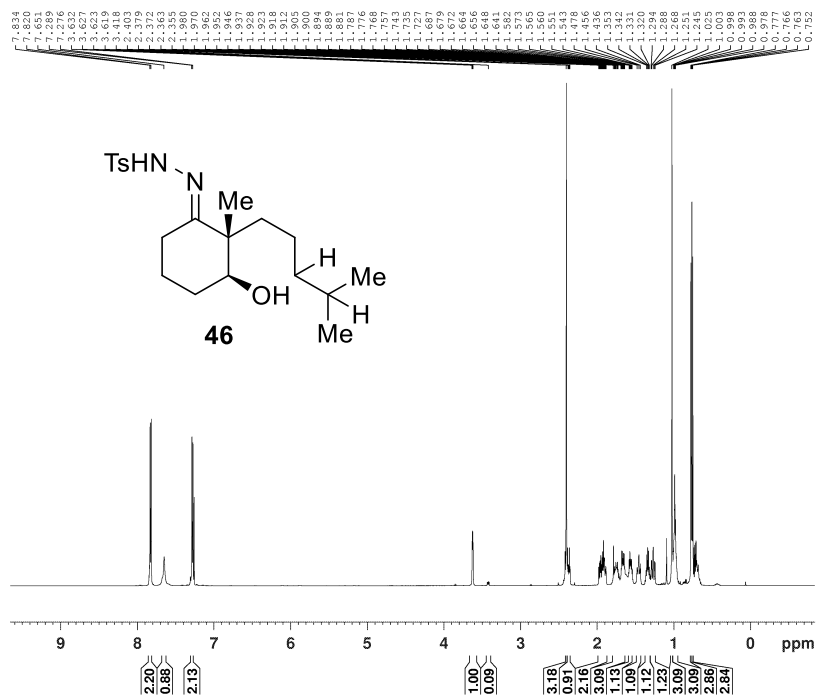

Current Data Parameters  
 NAME rjs-1274 Pure  
 EXPNO 1  
 PROCNO 1

F2 - Acquisition Parameter  
 Date\_ 20150427  
 Time 8.28  
 INSTRUM spect  
 PROBHD 5 mm CPQCI 1H/  
 PULPROG zg30  
 TD 65536  
 SOLVENT CDCl3  
 NS 26  
 DS 2  
 SWH 12019.230 Hz  
 FIDRES 0.183399 Hz  
 AQ 2.7262976 se  
 RG 16  
 DW 41.600 us  
 DE 10.00 us  
 TE 298.1 K  
 D1 1.00000000 se  
 TD0 1

===== CHANNEL f1 =====  
 SFO1 600.1337060 MH  
 NUC1 1H  
 P1 10.15 us  
 PLW1 13.00000000 W

F2 - Processing parameters  
 SI 65536  
 SF 600.1300142 MH  
 WDW EM  
 SSB 0  
 LB 0.30 Hz  
 GB 0  
 PC 1.00

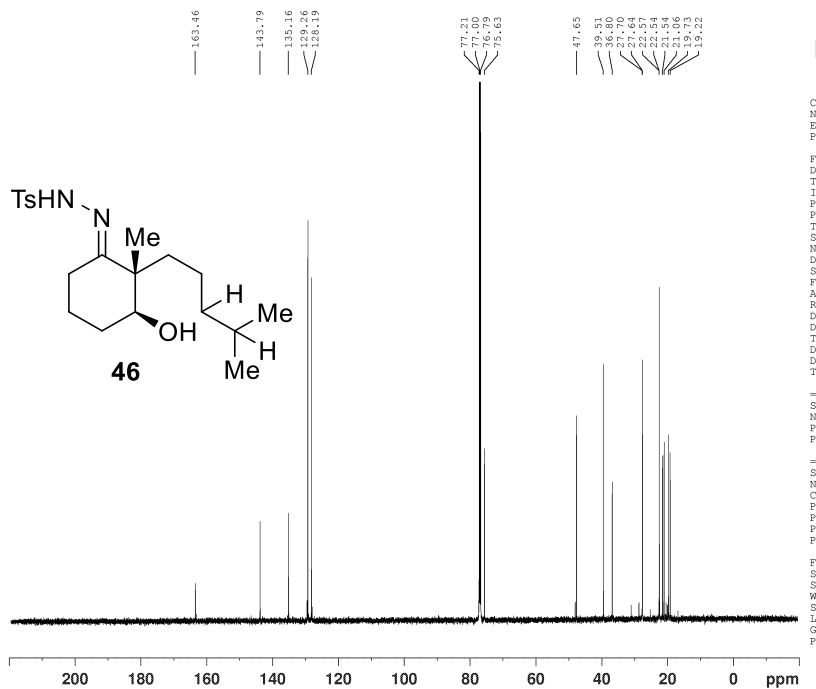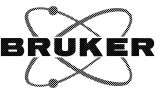

Current Data Parameters  
 NAME rjs-1274 Pure Carbon  
 EXPNO 1  
 PROCNO 1

F2 - Acquisition Parameters  
 Date\_ 20150427  
 Time 8.32  
 INSTRUM spect  
 PROBHD 5 mm CPQCI 1H/  
 PULPROG zgpg30  
 TD 65536  
 SOLVENT CDCl3  
 NS 62  
 DS 4  
 SWH 36057.691 Hz  
 FIDRES 0.550197 Hz  
 AQ 0.9087659 sec  
 RG 203  
 DW 13.867 usec  
 DE 18.00 usec  
 TE 298.2 K  
 D1 2.00000000 sec  
 D11 0.03000000 sec  
 TD0 1

===== CHANNEL f1 =====  
 SFO1 150.9178981 MHz  
 NUC1 13C  
 P1 11.50 usec  
 PLW1 230.00000000 W

===== CHANNEL f2 =====  
 SFO2 600.1324005 MHz  
 NUC2 1H  
 CPDPRG[2] waltz16  
 PCPD2 90.00 usec  
 PLW2 13.00000000 W  
 PLW12 0.16534001 W  
 PLW13 0.13393000 W

F2 - Processing parameters  
 SI 32768  
 SF 150.9028163 MHz  
 WDW EM  
 SSB 0  
 LB 1.00 Hz  
 GB 0  
 PC 1.40

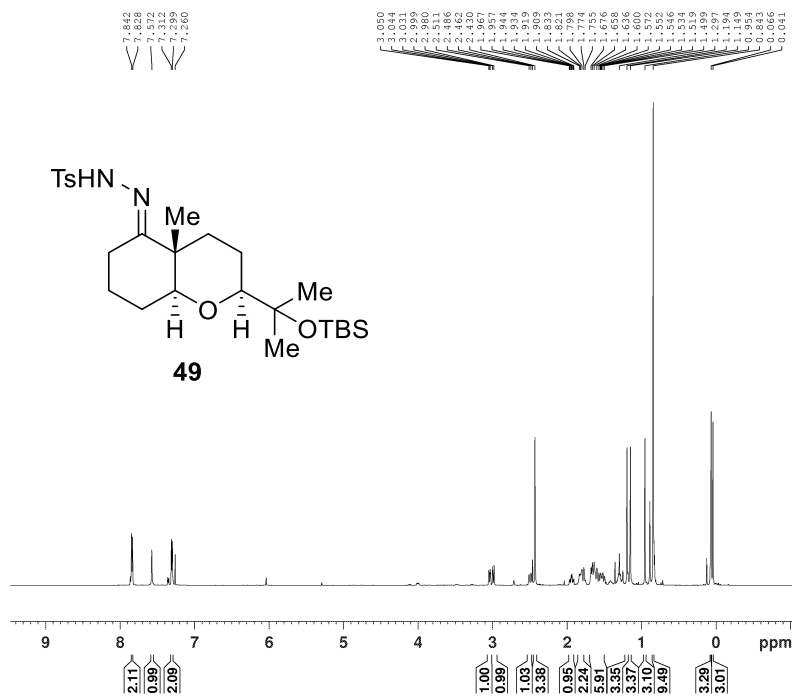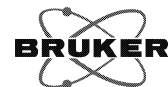

Current Data Parameters  
NAME rjs-0763 Pure  
EXPNO 1  
PROCNO 1

F2 - Acquisition Parameters  
Date\_ 20150119  
Time 6.56  
INSTRUM spect  
PROBHD 5 mm CPQNP 1H/  
PULPROG zg30  
TD 65536  
SOLVENT CDCl3  
NS 27  
DS 2  
SWH 12019.230 Hz  
FIDRES 0.183399 Hz  
AQ 2.7262976 sec  
RG 22.6  
DW 41.600 usec  
DE 10.00 usec  
TE 298.0 K  
D1 1.00000000 sec  
TD0 1

===== CHANNEL f1 =====  
SFO1 600.1337060 MHz  
NUC1 1H  
P1 13.00 usec  
PLW1 9.00000000 W

F2 - Processing parameters  
SI 65536  
SF 600.1300161 MHz  
WDW EM  
SSB 0  
LB 0.30 Hz  
GB 0  
PC 1.00

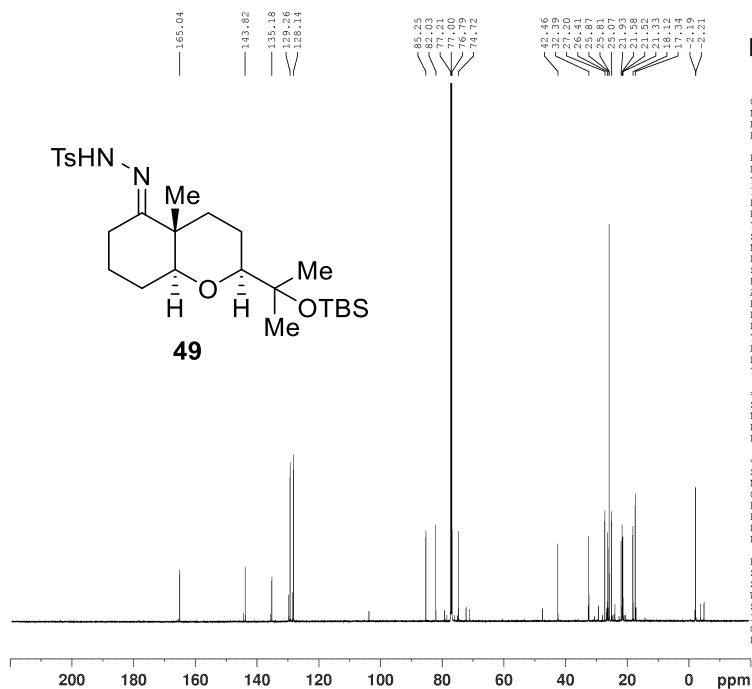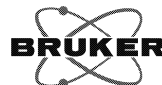

Current Data Parameters  
NAME rjs-0763 Pure Carbon  
EXPNO 1  
PROCNO 1

F2 - Acquisition Parameters  
Date\_ 20150119  
Time 7.00  
INSTRUM spect  
PROBHD 5 mm CPQNP 1H/  
PULPROG zgpg30  
TD 65536  
SOLVENT CDCl3  
NS 69  
DS 4  
SWH 36057.691 Hz  
FIDRES 0.550197 Hz  
AQ 0.9087659 sec  
RG 203  
DW 13.867 usec  
DE 18.00 usec  
TE 298.1 K  
D1 2.00000000 sec  
D11 0.03000000 sec  
TD0 1

===== CHANNEL f1 =====  
SFO1 150.9178981 MHz  
NUC1 13C  
P1 11.00 usec  
PLW1 30.00000000 W

===== CHANNEL f2 =====  
SFO2 600.1324005 MHz  
NUC2 1H  
CPDPRG2 waltz16  
PCPD2 80.00 usec  
PLW2 9.00000000 W  
PLW12 0.36587000 W  
PLW13 0.17016000 W

F2 - Processing parameters  
SI 32768  
SF 150.9028173 MHz  
WDW EM  
SSB 0  
LB 1.00 Hz  
GB 0  
PC 1.40



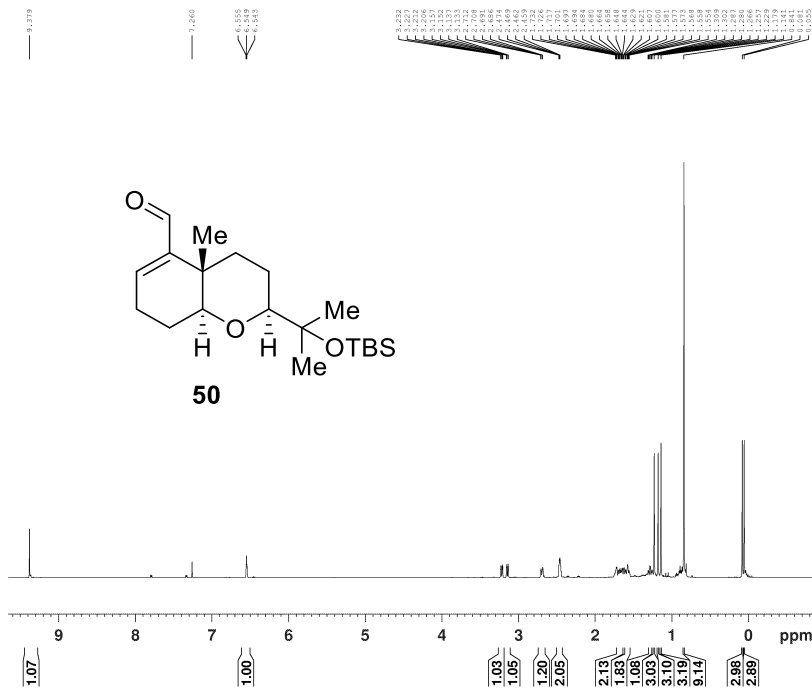

Current Data Parameters  
 NAME rjs-2479 Pure proton  
 EXPNO 1  
 PROCNO 1

F2 - Acquisition Parameters  
 Date\_ 20150303  
 Time 6.18  
 INSTRUM spect  
 PROBHD 5 mm CPQNP 1H/  
 PULPROG zgpg30  
 TD 65536  
 SOLVENT CDCl3  
 NS 14  
 DS 2  
 SWH 12019.230 Hz  
 FIDRES 0.183399 Hz  
 AQ 2.7262976 sec  
 RG 32  
 DW 41.600 usec  
 DE 10.00 usec  
 TE 298.2 K  
 D1 1.00000000 sec  
 TDO 1

===== CHANNEL f1 =====  
 SFO1 600.137060 MHz  
 NUC1 1H  
 P1 13.00 usec  
 PLW1 9.00000000 W

F2 - Processing parameters  
 SI 65536  
 SF 600.1300175 MHz  
 WDW EM  
 SSB 0  
 LB 0.30 Hz  
 GB 0  
 PC 1.00

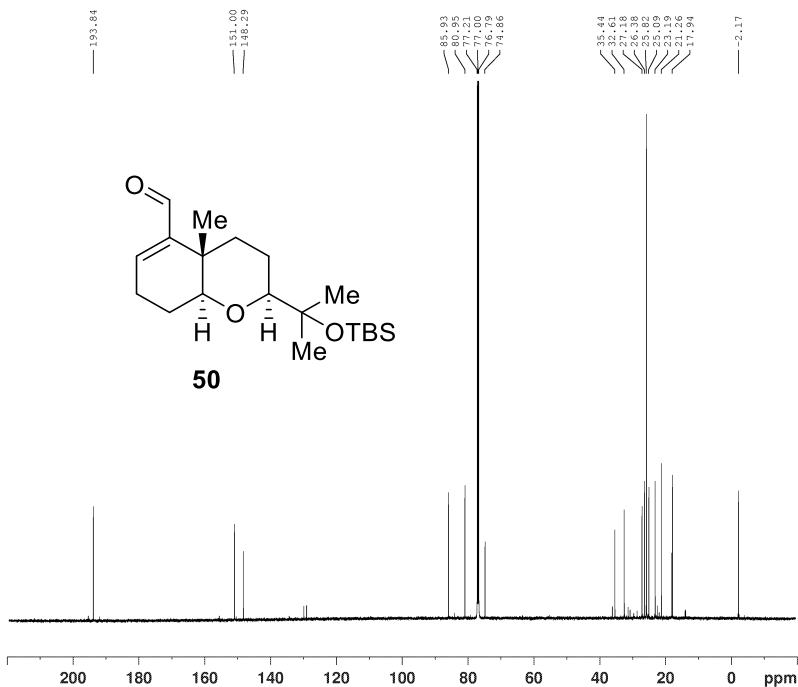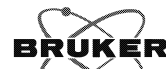

Current Data Parameters  
 NAME rjs-2479 Pure Carbon 1  
 EXPNO 1  
 PROCNO 1

F2 - Acquisition Parameters  
 Date\_ 20150303  
 Time 6.22  
 INSTRUM spect  
 PROBHD 5 mm CPQNP 1H/  
 PULPROG zgpg30  
 TD 65536  
 SOLVENT CDCl3  
 NS 32  
 DS 4  
 SWH 36057.691 Hz  
 FIDRES 0.550197 Hz  
 AQ 0.9087659 sec  
 RG 203  
 DW 13.867 usec  
 DE 18.00 usec  
 TE 298.1 K  
 D1 2.00000000 sec  
 D11 0.03000000 sec  
 TDO 1

===== CHANNEL f1 =====  
 SFO1 150.9178981 MHz  
 NUC1 13C  
 P1 11.00 usec  
 PLW1 30.00000000 W

===== CHANNEL f2 =====  
 SFO2 600.1324005 MHz  
 NUC2 1H  
 CPDPRG2 waltz16  
 PCPD2 80.00 usec  
 PLM2 9.00000000 W  
 PLM12 0.26587000 W  
 PLM13 0.17016000 W

F2 - Processing parameters  
 SI 32768  
 SF 150.9028140 MHz  
 WDW EM  
 SSB 0  
 LB 1.00 Hz  
 GB 0  
 PC 1.40

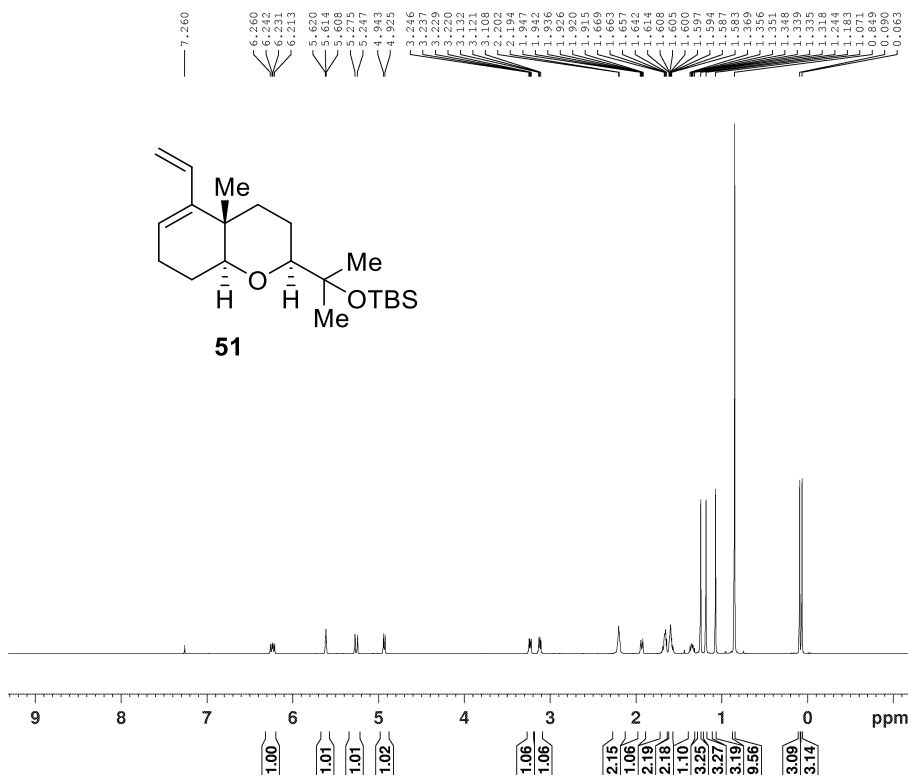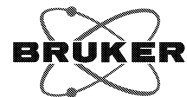

Current Data Parameters  
 Name rjs-2481 Pure  
 Expno 1  
 Procno 1

F2 - Acquisition Parameters  
 Date\_ 20150303  
 Time 6.26  
 Instrum spect  
 Probhd 5 mm CPQNP 1H/  
 Pulprog zgpg30  
 ID 65536  
 Solvent CDCl3  
 NS 20  
 DS 2  
 SWH 12019.230 Hz  
 FIDRES 0.183399 Hz  
 AQ 2.7262976 sec  
 RG 22.6  
 DW 41.600 usec  
 DE 10.00 usec  
 TE 298.2 K  
 D1 1.00000000 sec  
 TDO 1

==== CHANNEL f1 =====  
 SF01 600.1337060 MHz  
 NUC1 1H  
 P1 13.00 usec  
 PLW1 9.00000000 W

F2 - Processing parameters  
 SI 65536  
 SF 600.1300171 MHz  
 WDW EM  
 SSB 0  
 LB 0.30 Hz  
 GB 0  
 PC 1.00

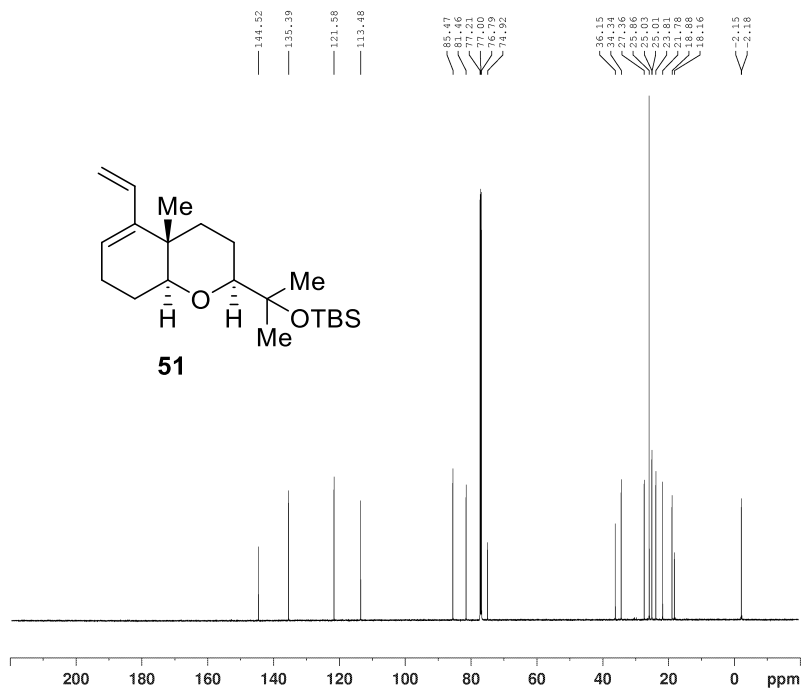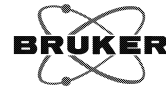

Current Data Parameters  
 Name rjs-2481 Pure Carbon  
 Expno 1  
 Procno 1

F2 - Acquisition Parameters  
 Date\_ 20150303  
 Time 6.28  
 Instrum spect  
 Probhd 5 mm CPQNP 1H/  
 Pulprog zgpg30  
 ID 65536  
 Solvent CDCl3  
 NS 48  
 DS 4  
 SWH 36057.691 Hz  
 FIDRES 0.550197 Hz  
 AQ 0.9087659 sec  
 RG 203  
 DW 13.867 usec  
 DE 18.00 usec  
 TE 298.1 K  
 D1 2.00000000 sec  
 D11 0.03000000 sec  
 TDO 1

==== CHANNEL f1 =====  
 SF01 150.9178981 MHz  
 NUC1 13C  
 P1 11.00 usec  
 PLW1 30.00000000 W

==== CHANNEL f2 =====  
 SF02 600.1324005 MHz  
 NUC2 1H  
 CPDPRG2 waltz16  
 PCPD2 80.00 usec  
 PLW2 9.00000000 W  
 PLW12 0.26587000 W  
 PLW13 0.17016000 W

F2 - Processing parameters  
 SI 32768  
 SF 150.9028118 MHz  
 WDW EM  
 SSB 0  
 LB 1.00 Hz  
 GB 0  
 PC 1.40

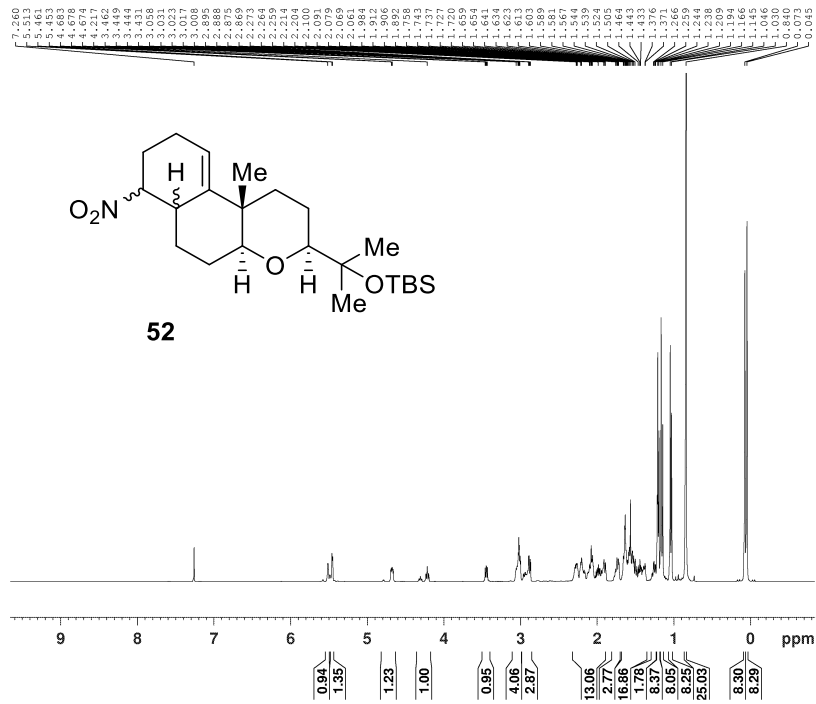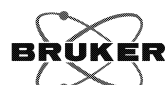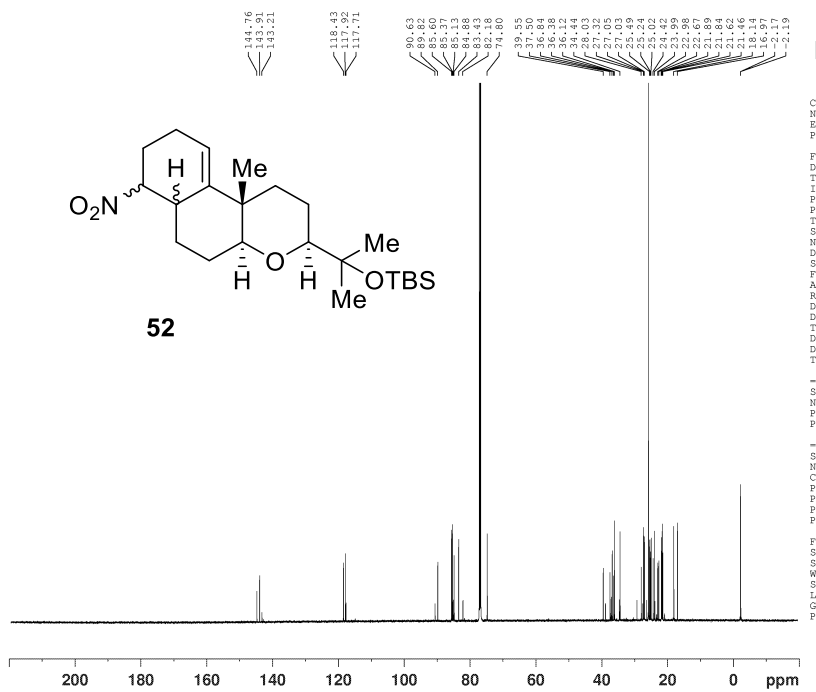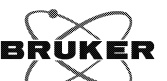

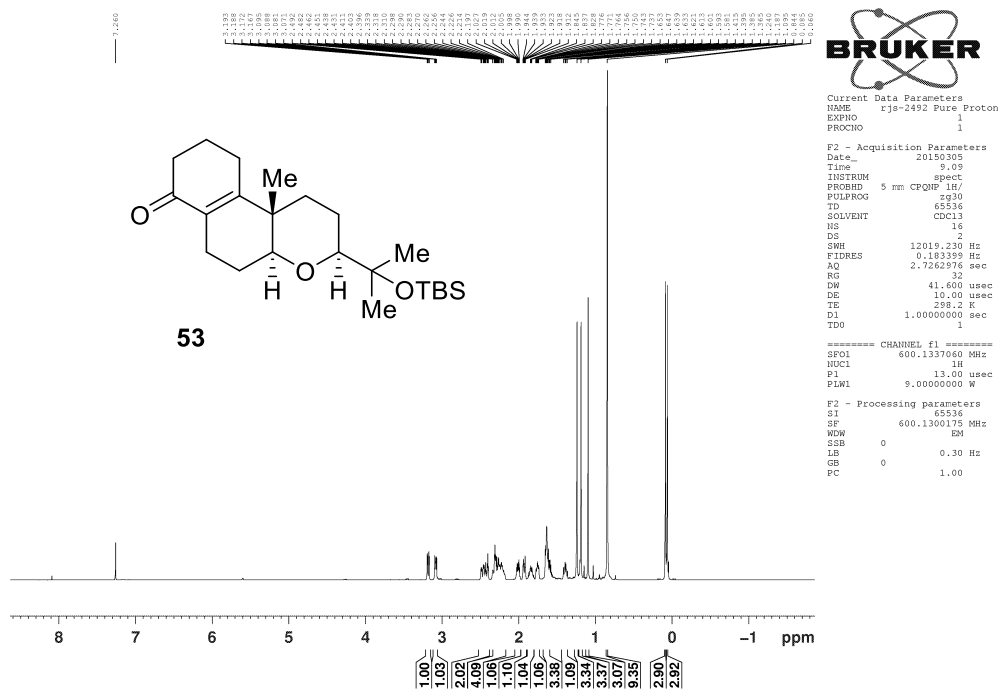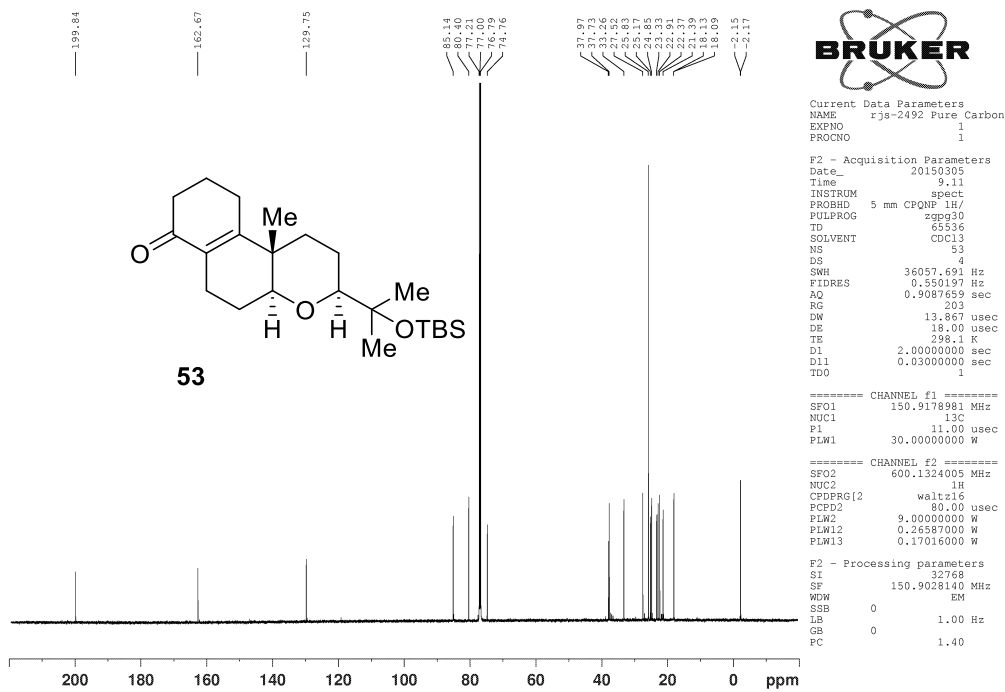



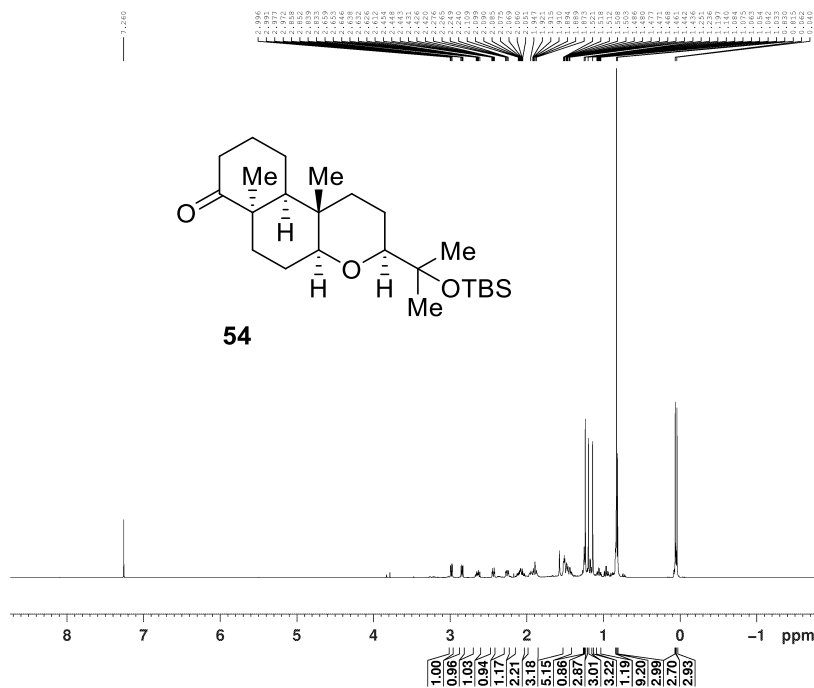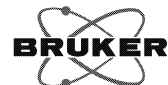

Current Data Parameters  
 NAME RJS-1208  
 EXPNO 1  
 PROCNO 1

F2 - Acquisition Parameter  
 Date\_ 20150312  
 Time 19.56  
 INSTRUM spect  
 PROBHD 5 mm CPQNP 1H/  
 PULPROG zg30  
 TD 65536  
 SOLVENT CDC13  
 NS 16  
 DS 2  
 SWH 12019.230 Hz  
 FIDRES 0.183399 Hz  
 AQ 2.7262976 se  
 RG 32  
 DW 41.600 us  
 DE 10.00 us  
 TE 298.2 K  
 D1 1.00000000 se  
 TD0 1

==== CHANNEL f1 =====  
 SFO1 600.1337060 MH  
 NUC1 1H  
 P1 13.00 us  
 PLW1 9.00000000 W

F2 - Processing parameters  
 SI 65536  
 SF 600.1300191 MH  
 WDW EM  
 SSB 0  
 LB 0.30 Hz  
 GB 0  
 PC 1.00

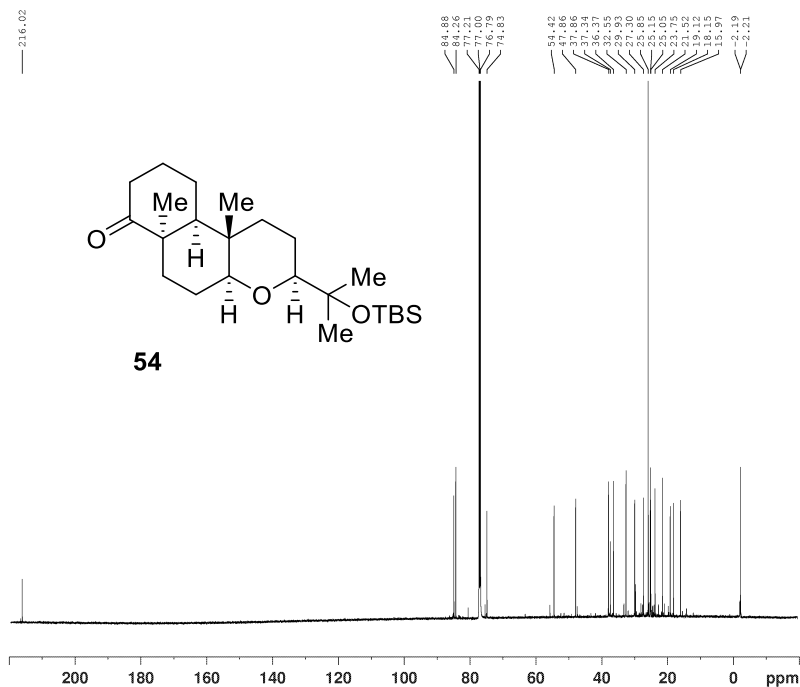

Current Data Parameters  
 NAME RJS-1208  
 EXPNO 2  
 PROCNO 1

F2 - Acquisition Parameters  
 Date\_ 20150312  
 Time 20.22  
 INSTRUM spect  
 PROBHD 5 mm CPQNP 1H/  
 PULPROG zgpg30  
 TD 65536  
 SOLVENT CDC13  
 NS 512  
 DS 4  
 SWH 36057.691 Hz  
 FIDRES 0.350197 Hz  
 AQ 0.9087659 sec  
 RG 203  
 DW 13.867 usec  
 DE 18.00 usec  
 TE 298.2 K  
 D1 2.00000000 sec  
 D11 0.03000000 sec  
 TD0 1

==== CHANNEL f1 =====  
 SFO1 150.9178991 MHz  
 NUC1 13C  
 P1 11.00 usec  
 PLW1 30.00000000 W

==== CHANNEL f2 =====  
 SFO2 600.1324005 MHz  
 NUC2 1H  
 CPDPRG[2] waltz16  
 PCPD2 80.00 usec  
 PLW2 9.00000000 W  
 PLW12 0.26587000 W  
 PLW13 0.17016000 W

F2 - Processing parameters  
 SI 32768  
 SF 150.9028129 MHz  
 WDW EM  
 SSB 0  
 LB 1.00 Hz  
 GB 0  
 PC 1.40

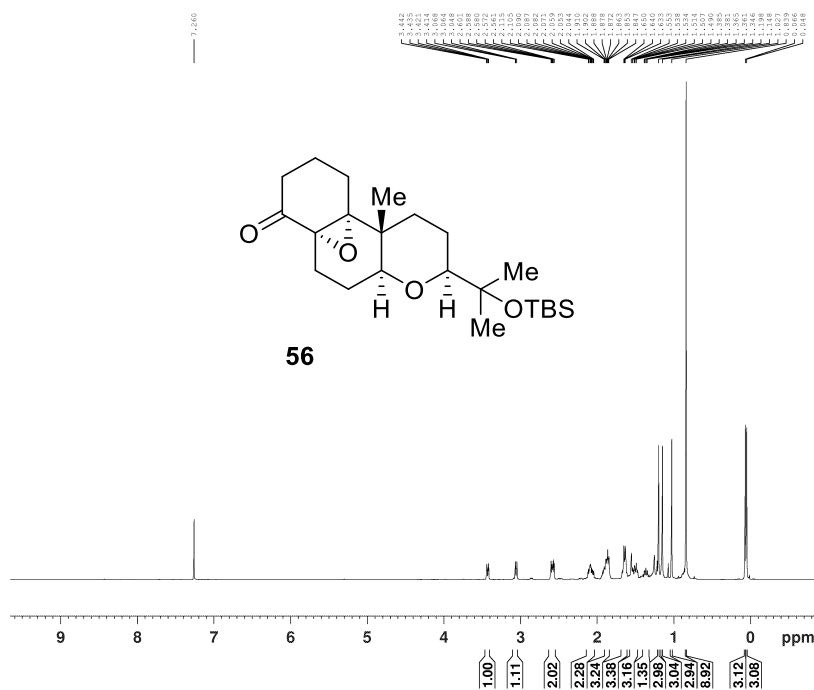

Current Data Parameters  
NAME rjs-1222 Pure  
EXPNO 1  
PROCNO 1

F2 - Acquisition Parameters  
Date\_ 20150317  
Time 6.21  
INSTRUM spect  
PROBHD 5 mm CPQNP 1H/  
PULPROG zg30  
TD 65536  
SOLVENT CDCl3  
NS 20  
DS 2  
SWH 12019.230 Hz  
FIDRES 0.183399 Hz  
AQ 2.7262976 se  
RG 32  
DW 41.600 us  
DE 10.00 us  
TE 298.1 K  
D1 1.00000000 se  
TD0 1

===== CHANNEL f1 =====  
SFO1 600.1337060 MH  
NUC1 1H  
P1 13.00 us  
PLW1 9.00000000 W

F2 - Processing parameters  
SI 65536  
SF 600.1300173 MH  
WDW EM  
SSB 0  
LB 0.30 Hz  
GB 0  
FC 1.00

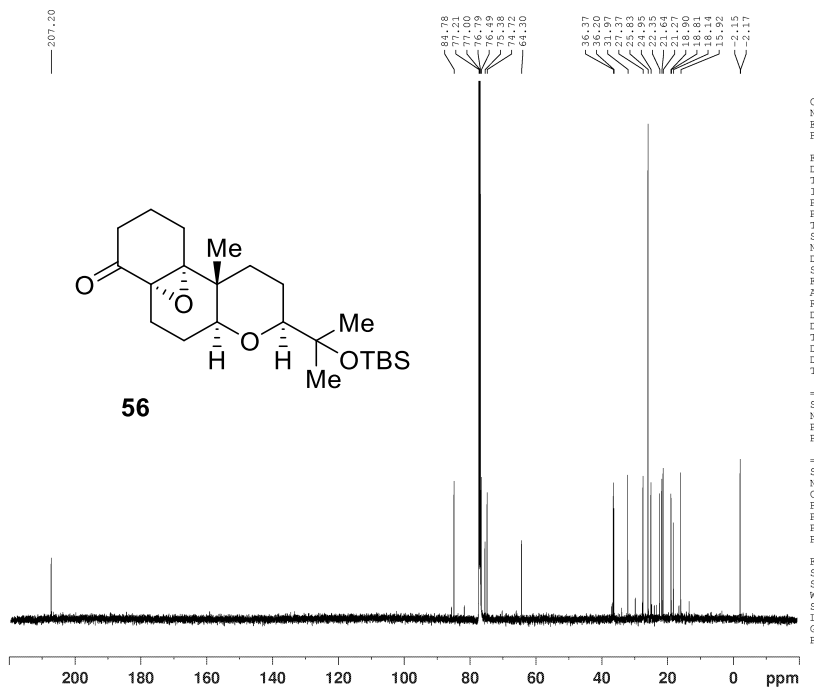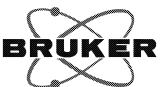

Current Data Parameters  
NAME rjs-1222 Pure Carbon  
EXPNO 1  
PROCNO 1

F2 - Acquisition Parameters  
Date\_ 20150317  
Time 6.24  
INSTRUM spect  
PROBHD 5 mm CPQNP 1H/  
PULPROG zgpg30  
TD 65536  
SOLVENT CDCl3  
NS 88  
DS 4  
SWH 36057.691 Hz  
FIDRES 0.550197 Hz  
AQ 0.9087659 sec  
RG 203  
DW 13.867 usec  
DE 18.00 usec  
TE 298.1 K  
D1 2.00000000 sec  
D11 0.03000000 sec  
TD0 1

===== CHANNEL f1 =====  
SFO1 150.9178981 MHz  
NUC1 13C  
P1 11.00 usec  
PLW1 30.00000000 W

===== CHANNEL f2 =====  
SFO2 600.1324005 MHz  
NUC2 1H  
CFPRG[2] waltz16  
PCPD2 80.00 usec  
PLW2 9.00000000 W  
PLW12 0.24587000 W  
PLW13 0.17016000 W

F2 - Processing parameters  
SI 32768  
SF 150.9028120 MHz  
WDW EM  
SSB 0  
LB 1.00 Hz  
GB 0  
FC 1.40

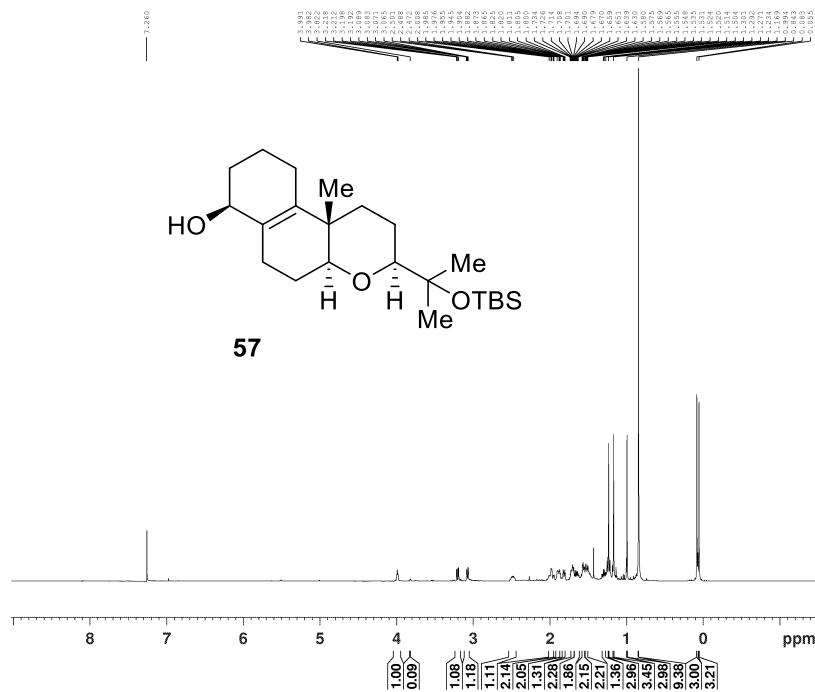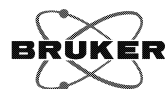

Current Data Parameters  
 NAME rjs-1224  
 EXPNO 1  
 PROCNO 1

F2 - Acquisition Parameters  
 Date\_ 20150317  
 Time 14.17  
 INSTRUM spect  
 PROBHD 5 mm CPQNP 1H/  
 PULPROG zg30  
 TD 65536  
 SOLVENT CDC13  
 NS 16  
 DS 2  
 SWH 12019.230 Hz  
 FIDRES 0.183399 Hz  
 AQ 2.7262976 se  
 RG 32  
 DW 41.600 us  
 DE 10.00 us  
 TE 298.2 K  
 D1 1.00000000 se  
 TD0 1

==== CHANNEL f1 =====  
 SFO1 600.1337060 MH  
 NUC1 1H  
 P1 13.00 us  
 PLW1 9.00000000 W

F2 - Processing parameters  
 SI 65536  
 SF 600.1300188 MH  
 WDW EM  
 SSB 0  
 LB 0.30 Hz  
 GB 0  
 PC 1.00

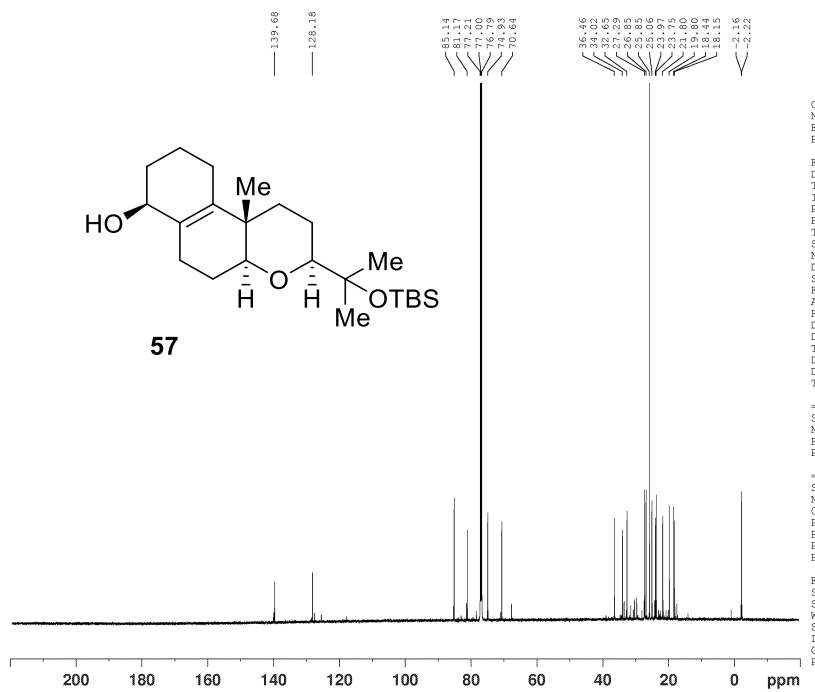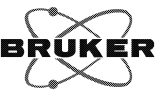

Current Data Parameters  
 NAME rjs-1224  
 EXPNO 2  
 PROCNO 1

F2 - Acquisition Parameters  
 Date\_ 20150317  
 Time 14.24  
 INSTRUM spect  
 PROBHD 5 mm CPQNP 1H/  
 PULPROG zgpg30  
 TD 65536  
 SOLVENT CDC13  
 NS 128  
 DS 4  
 SWH 36057.691 Hz  
 FIDRES 0.350197 Hz  
 AQ 0.9087659 sec  
 RG 203  
 DW 13.867 usec  
 DE 18.00 usec  
 TE 298.1 K  
 D1 2.00000000 sec  
 D11 0.03000000 sec  
 TD0 1

==== CHANNEL f1 =====  
 SFO1 150.9178981 MHz  
 NUC1 13C  
 P1 11.00 usec  
 PLW1 30.00000000 W

==== CHANNEL f2 =====  
 SFO2 600.1324005 MHz  
 NUC2 1H  
 CPDPRG[2] waltz16  
 PCFD2 80.00 usec  
 PLW2 9.00000000 W  
 PLM12 0.26587000 W  
 PLM13 0.17016000 W

F2 - Processing parameters  
 SI 32768  
 SF 150.9028140 MHz  
 WDW EM  
 SSB 0  
 LB 1.00 Hz  
 GB 0  
 PC 1.40



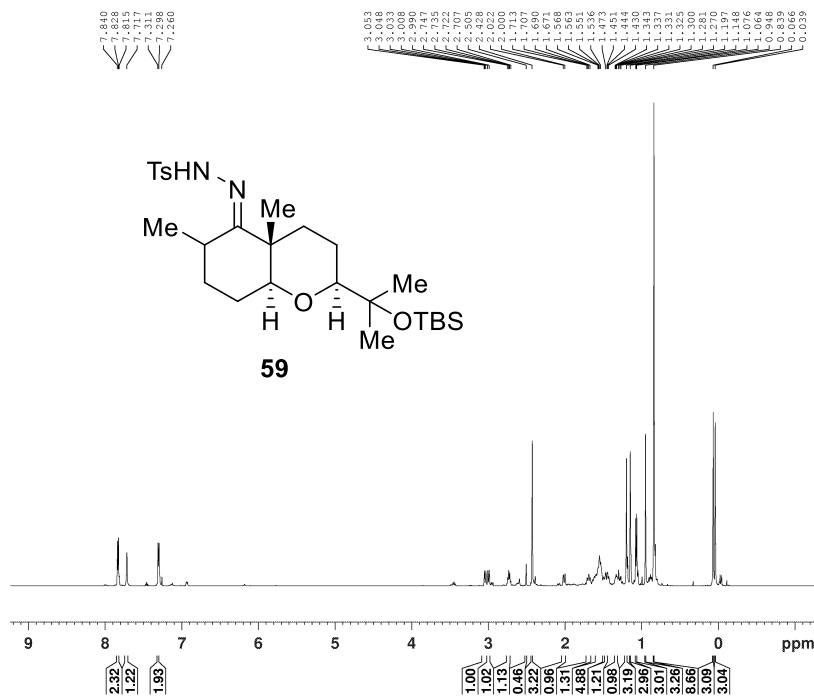

Current Data Parameters  
NAME rjs-2483 Pure Prot  
EXNO 1  
PROCNO 1

F2 - Acquisition Parameters  
Date\_ 20150303  
Time 16.47  
INSTRUM spect  
PROBHD 5 mm CPQNP 1H/  
PULPROG zg30  
TD 65536  
SOLVENT CDCl3  
NS 20  
DS 2  
SWH 12019.230 Hz  
FIDRES 0.183399 Hz  
AQ 2.7262976 sec  
RG 16  
DW 41.600 usec  
DE 10.00 usec  
TE 298.1 K  
D1 1.00000000 sec  
TD0 1

===== CHANNEL f1 =====  
SF01 600.1337060 MHz  
NUC1 1H  
P1 13.00 usec  
PLW1 9.00000000 W  
F2 - Processing parameters  
SI 65536  
SF 600.1300179 MHz  
WDW EM  
SSB 0  
LB 0.30 Hz  
GB 0  
PC 1.00

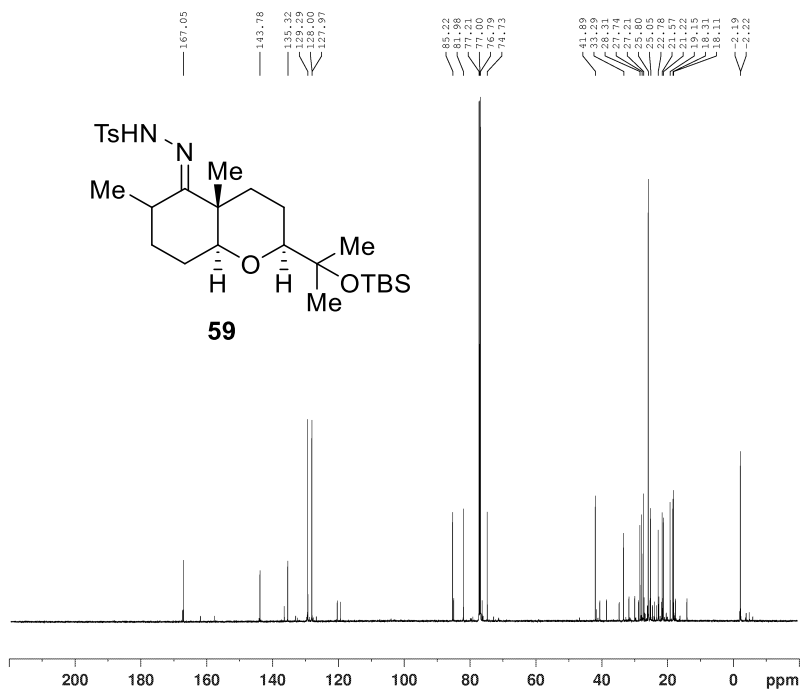

Current Data Parameters  
NAME rjs-2483 Pure Carbon  
EXNO 1  
PROCNO 1

F2 - Acquisition Parameters  
Date\_ 20150303  
Time 16.50  
INSTRUM spect  
PROBHD 5 mm CPQNP 1H/  
PULPROG zgpg30  
TD 65536  
SOLVENT CDCl3  
NS 61  
DS 4  
SWH 36057.691 Hz  
FIDRES 0.550197 Hz  
AQ 0.9087659 sec  
RG 203  
DW 13.867 usec  
DE 18.00 usec  
TE 298.1 K  
D1 2.00000000 sec  
D11 0.03000000 sec  
TD0 1

===== CHANNEL f1 =====  
SF01 150.9178981 MHz  
NUC1 13C  
P1 11.00 usec  
PLW1 30.00000000 W  
===== CHANNEL f2 =====  
SF02 600.1324005 MHz  
NUC2 1H  
CFPRG[2] waltz16  
PCPD2 80.00 usec  
PLW2 9.00000000 W  
PLW12 0.24587000 W  
PLW13 0.17016000 W

F2 - Processing parameters  
SI 32768  
SF 150.9028188 MHz  
WDW EM  
SSB 0  
LB 1.00 Hz  
GB 0  
PC 1.40

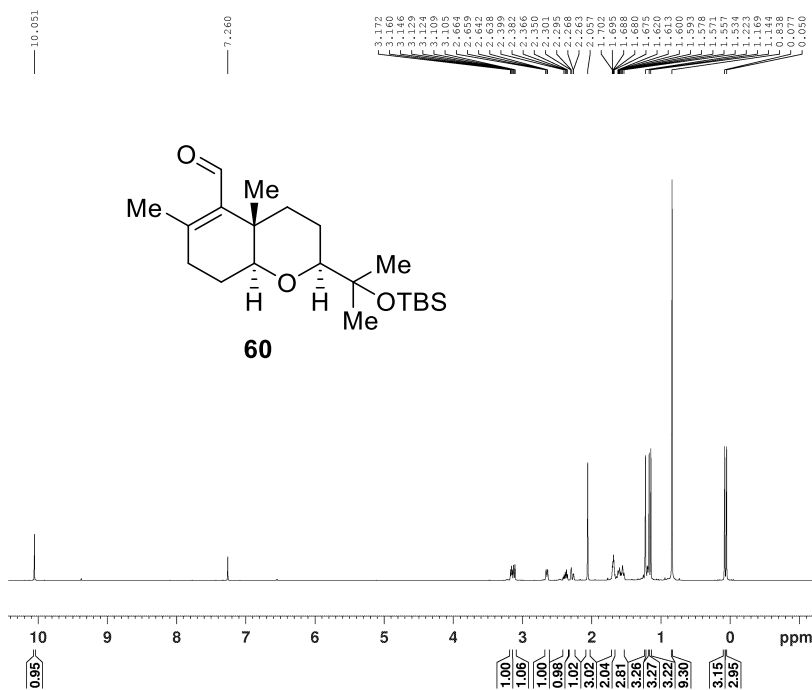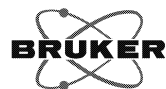

Current Data Parameters  
 NAME rjs-2486 Pure Prot  
 EXPNO 1  
 PROCNO 1

F2 - Acquisition Parameters  
 Date\_ 20150305  
 Time 9.02  
 INSTRUM spect  
 PROBHD 5 mm CPQNP 1H/  
 PULPROG zg30  
 TD 65536  
 SOLVENT CDCl3  
 NS 15  
 DS 2  
 SWH 12019.230 Hz  
 FIDRES 0.183399 Hz  
 AQ 2.7262976 sec  
 RG 32  
 DW 41.600 usec  
 DE 10.00 usec  
 TE 298.1 K  
 D1 1.00000000 sec  
 TDO 1

===== CHANNEL f1 =====  
 SF01 600.1337060 MHz  
 NUC1 1H  
 P1 13.00 usec  
 PLW1 9.00000000 W

F2 - Processing parameters  
 SI 65536  
 SF 600.1300176 MHz  
 WDW EM  
 SSB 0  
 LB 0.30 Hz  
 GB 0  
 FC 1.00

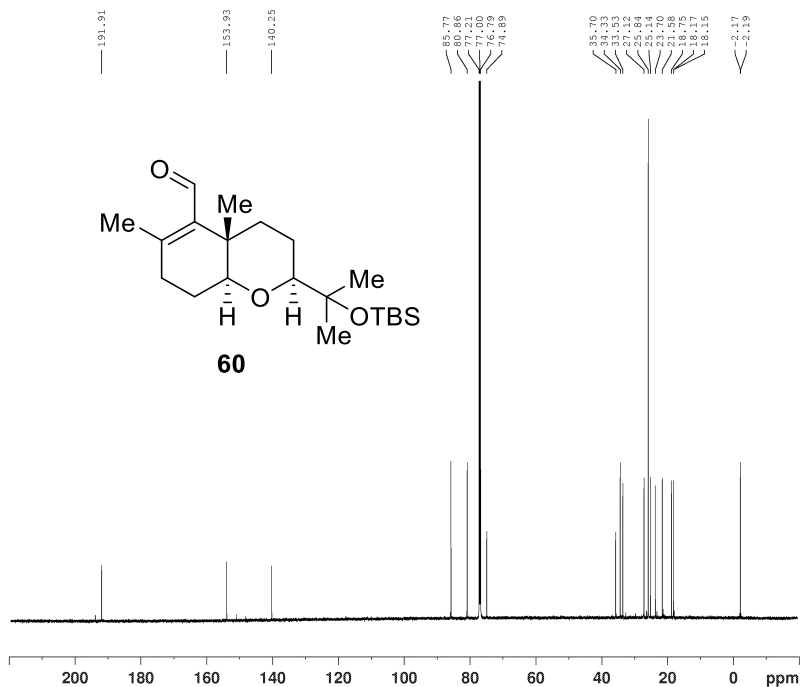

Current Data Parameters  
 NAME rjs-2486 Pure Carbon  
 EXPNO 1  
 PROCNO 1

F2 - Acquisition Parameters  
 Date\_ 20150305  
 Time 9.05  
 INSTRUM spect  
 PROBHD 5 mm CPQNP 1H/  
 PULPROG zgpg30  
 TD 65536  
 SOLVENT CDCl3  
 NS 54  
 DS 4  
 SWH 36057.691 Hz  
 FIDRES 0.550197 Hz  
 AQ 0.9087659 sec  
 RG 203  
 DW 13.867 usec  
 DE 18.00 usec  
 TE 298.2 K  
 D1 2.00000000 sec  
 D11 0.03000000 sec  
 TDO 1

===== CHANNEL f1 =====  
 SF01 150.9178981 MHz  
 NUC1 13C  
 P1 11.00 usec  
 PLW1 30.00000000 W

===== CHANNEL f2 =====  
 SF02 600.1324005 MHz  
 NUC2 1H  
 CPDPRG2 waltz16  
 PCPD2 80.00 usec  
 PLW2 9.00000000 W  
 PLW12 0.26587000 W  
 PLW13 0.17016000 W

F2 - Processing parameters  
 SI 32768  
 SF 150.9028132 MHz  
 WDW EM  
 SSB 0  
 LB 1.00 Hz  
 GB 0  
 FC 1.40

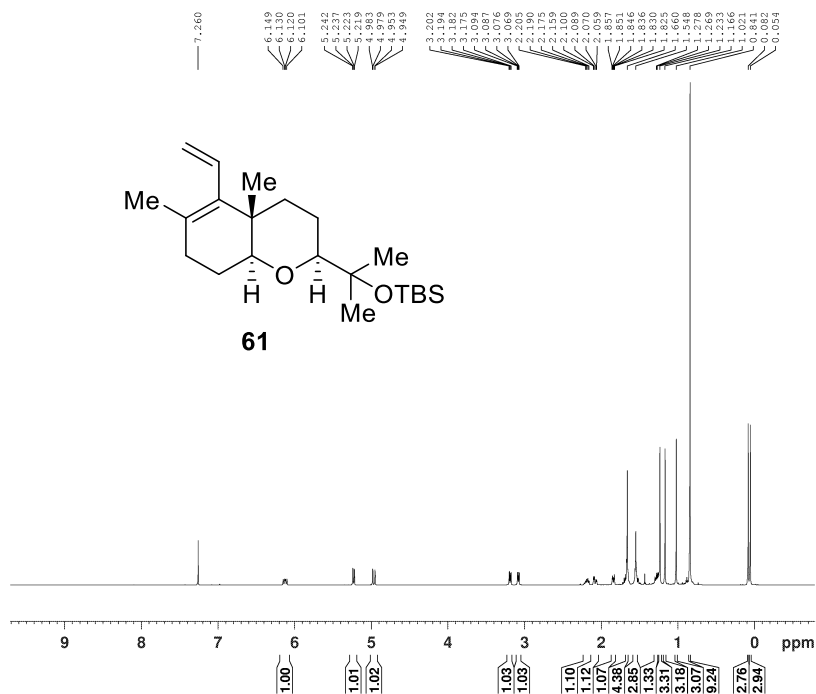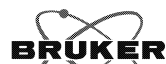

Current Data Parameters  
NAME rjs-2493 Pure Proton  
EXNO 1  
PROCNO 1

F2 - Acquisition Parameters  
Date\_ 20150305  
Time 15:20  
INSTRUM spect  
PROBHD 5 mm CPQNP 1H/  
FULPROG zgpg30  
TD 65536  
SOLVENT CDCl3  
NS 27  
DS 2  
SWH 12019.230 Hz  
FIDRES 0.183399 Hz  
AQ 2.7262976 sec  
RG 32  
EW 41.600 usec  
DE 10.00 usec  
TE 298.1 K  
D1 1.00000000 sec  
TD0 1

----- CHANNEL f1 -----  
SFO1 600.137060 MHz  
NUC1 1H  
P1 13.00 usec  
PLW1 9.00000000 W

F2 - Processing parameters  
SI 65536  
SF 600.1300160 MHz  
WDW EM  
SSB 0  
LB 0.30 Hz  
GB 0  
PC 1.00

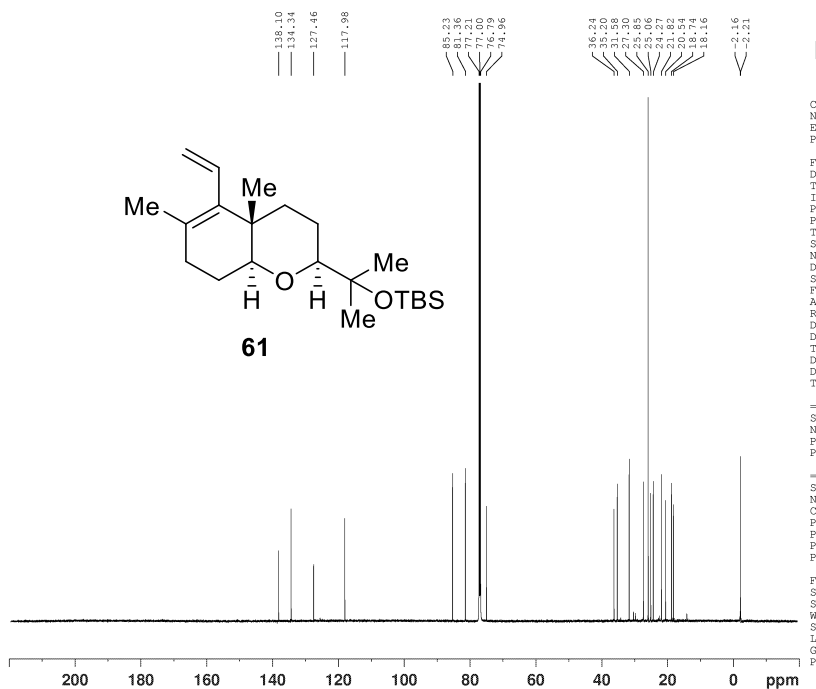

Current Data Parameters  
NAME rjs-2493  
EXNO 1  
PROCNO 1

F2 - Acquisition Parameters  
Date\_ 20150305  
Time 19:32  
INSTRUM spect  
PROBHD 5 mm CPQNP 1H/  
FULPROG zgpg30  
TD 65536  
SOLVENT CDCl3  
NS 512  
DS 4  
SWH 36057.691 Hz  
FIDRES 0.350197 Hz  
AQ 0.9087659 sec  
RG 203  
EW 13.867 usec  
DE 18.00 usec  
TE 298.1 K  
D1 2.00000000 sec  
D11 0.03000000 sec  
TD0 1

----- CHANNEL f1 -----  
SFO1 150.9178981 MHz  
NUC1 13C  
P1 11.00 usec  
PLW1 30.00000000 W

----- CHANNEL f2 -----  
SFO2 600.1324005 MHz  
NUC2 1H  
CPDPRG[2] waltz16  
PCPD2 80.00 usec  
PLW2 9.00000000 W  
PLM2 0.26587000 W  
PLW3 0.17016000 W

F2 - Processing parameters  
SI 32768  
SF 150.9028129 MHz  
WDW EM  
SSB 0  
LB 1.00 Hz  
GB 0  
PC 1.40

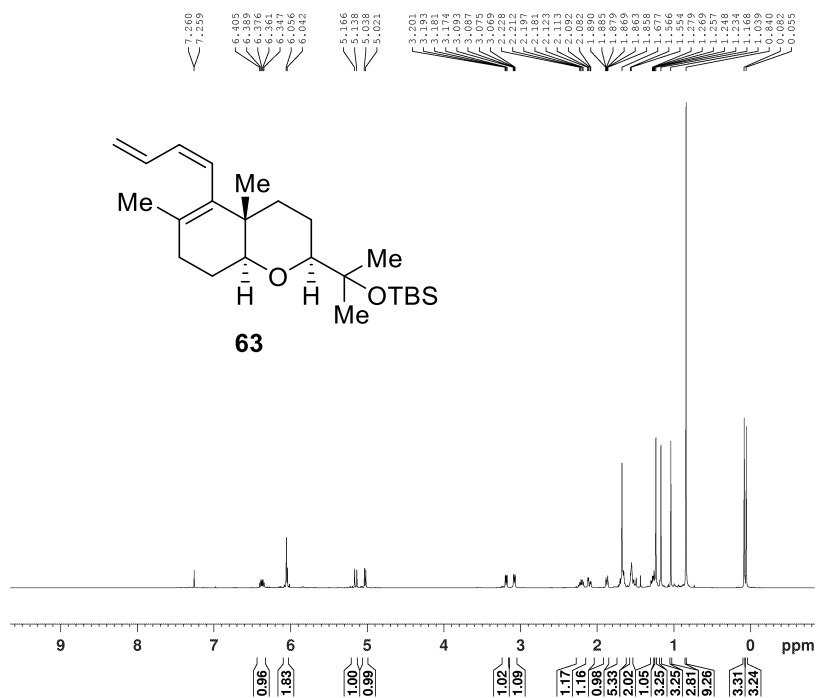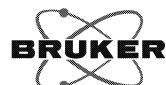

Current Data Parameters  
 NAME rjs-1207 Pure  
 EXPNO 1  
 PROCNO 1

F2 - Acquisition Parameter  
 Date\_ 20150313  
 Time 8.03  
 INSTRUM spect  
 PROBHD 5 mm CPQNP 1H/  
 PULPROG zg30  
 TD 65536  
 SOLVENT CDCl3  
 NS 15  
 DS 2  
 SWH 12019.230 Hz  
 FIDRES 0.183399 Hz  
 AQ 2.7262976 se  
 RG 32  
 DW 41.600 us  
 DE 10.00 us  
 TE 298.1 K  
 D1 1.00000000 se  
 TD0 1

===== CHANNEL f1 =====  
 SFO1 600.1337060 MH  
 NUC1 1H  
 P1 13.00 us  
 PLW1 9.00000000 W

F2 - Processing parameters  
 SI 65536  
 SF 600.1300182 MH  
 WDW EM  
 SSB 0  
 LB 0.30 Hz  
 GB 0  
 FC 1.00

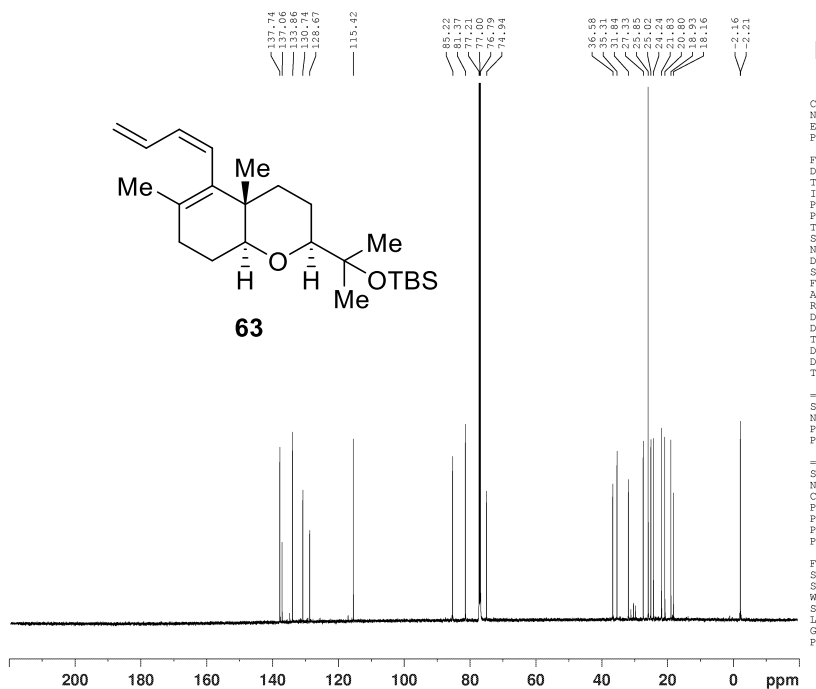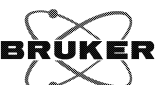

Current Data Parameters  
 NAME rjs-1207 Pure Carbon  
 EXPNO 1  
 PROCNO 1

F2 - Acquisition Parameters  
 Date\_ 20150313  
 Time 8.07  
 INSTRUM spect  
 PROBHD 5 mm CPQNP 1H/  
 PULPROG zgpg30  
 TD 65536  
 SOLVENT CDCl3  
 NS 83  
 DS 4  
 SWH 36057.691 Hz  
 FIDRES 0.550197 Hz  
 AQ 0.9087659 sec  
 RG 203  
 DW 13.867 usec  
 DE 18.00 usec  
 TE 298.1 K  
 D1 2.00000000 sec  
 D11 0.03000000 sec  
 TD0 1

===== CHANNEL f1 =====  
 SFO1 150.9178981 MHz  
 NUC1 13C  
 P1 11.00 usec  
 PLW1 30.00000000 W

===== CHANNEL f2 =====  
 SFO2 600.1324005 MHz  
 NUC2 1H  
 CPDPRG2 waltz16  
 FCPD2 80.00 usec  
 PLW2 9.00000000 W  
 PLW12 0.26587000 W  
 PLW13 0.17016000 W

F2 - Processing parameters  
 SI 32768  
 SF 150.9028129 MHz  
 WDW EM  
 SSB 0  
 LB 1.00 Hz  
 GB 0  
 FC 1.40

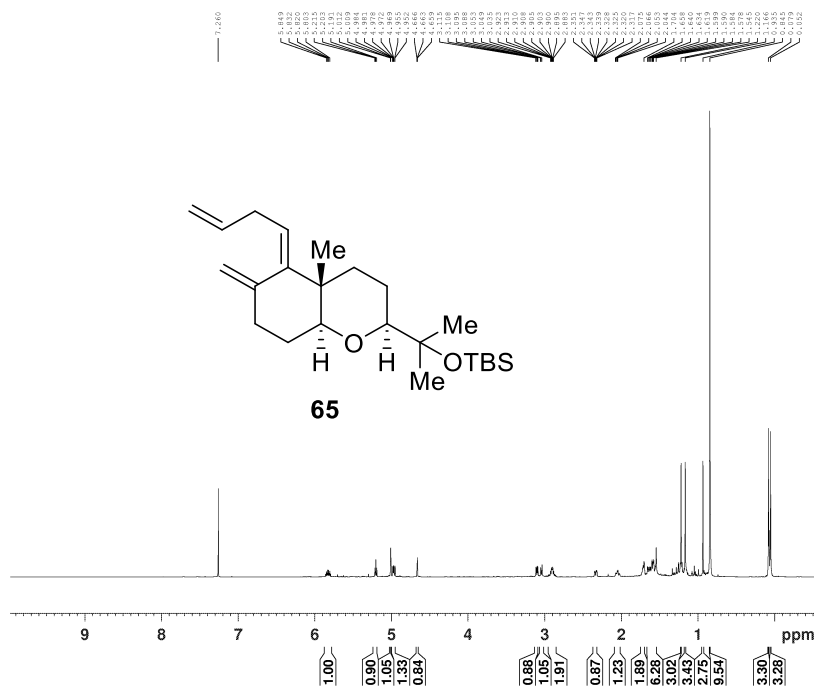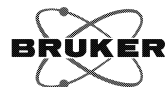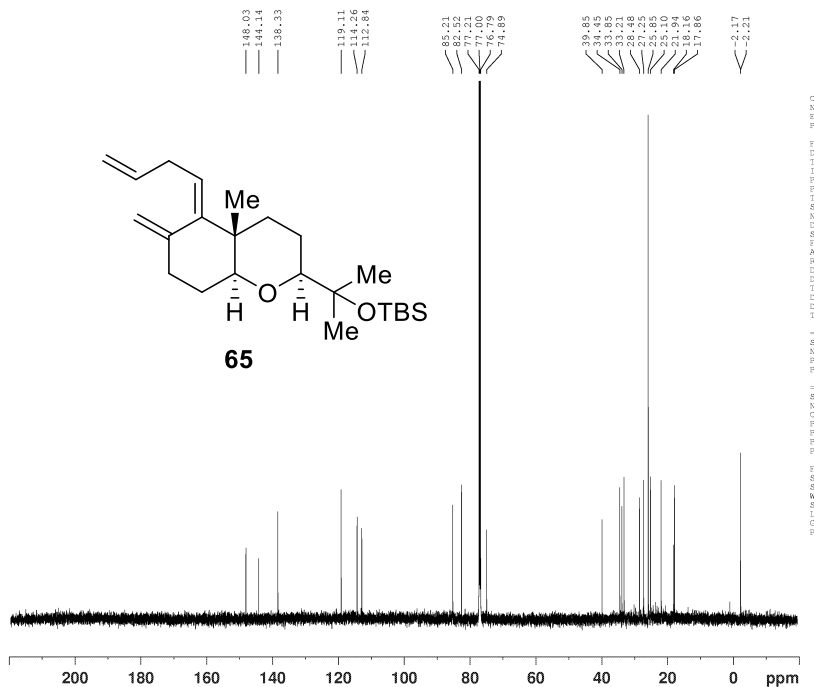

# COSY spectrum of 65 (in CDCl<sub>3</sub>)

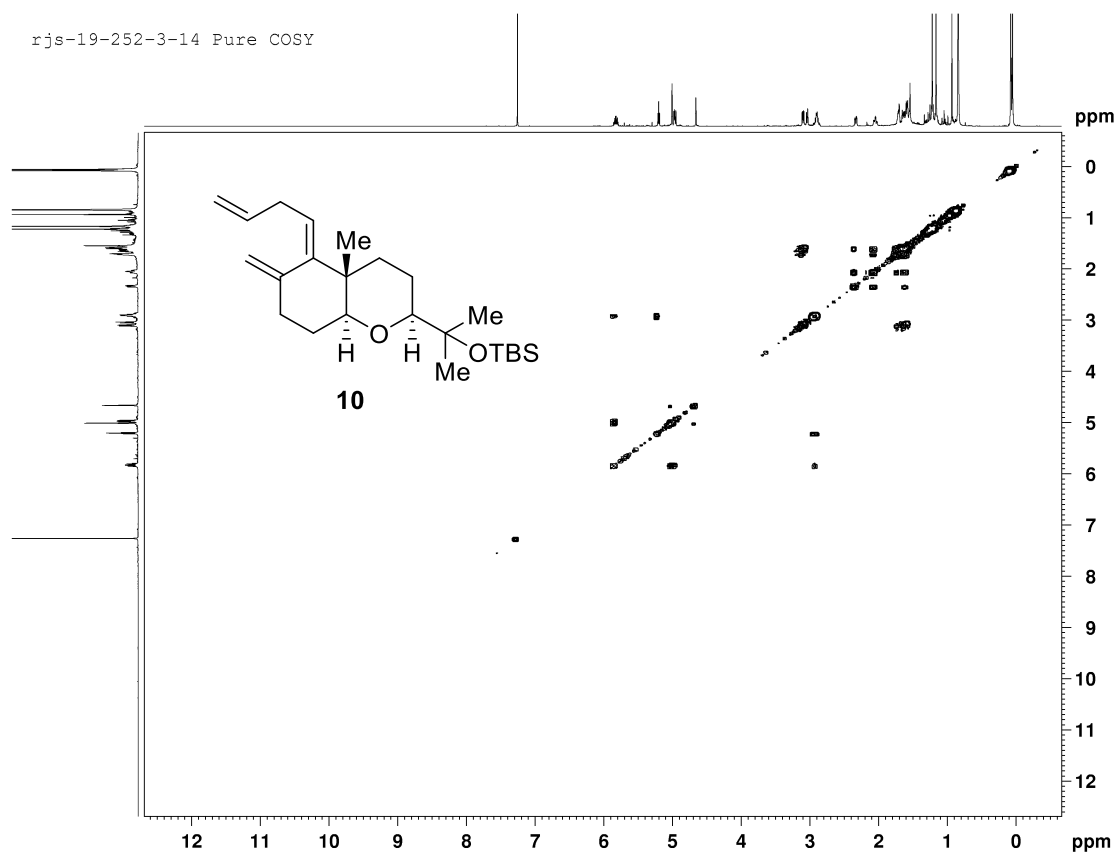

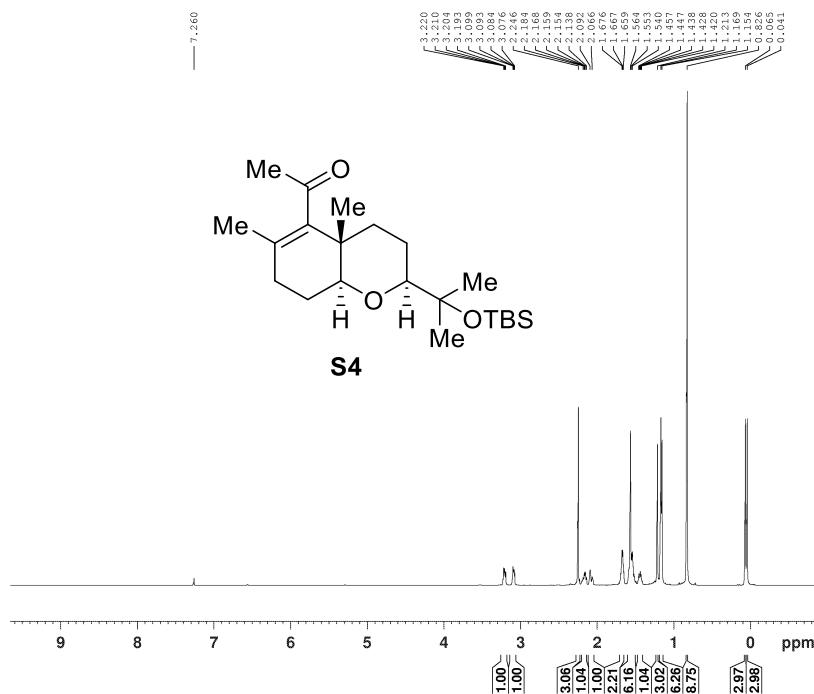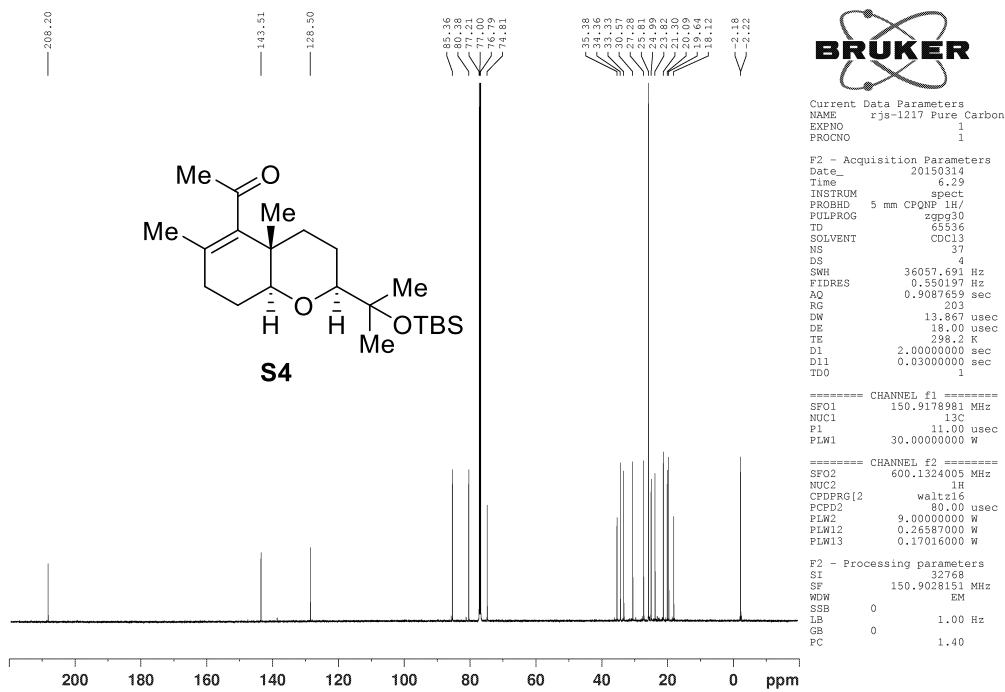

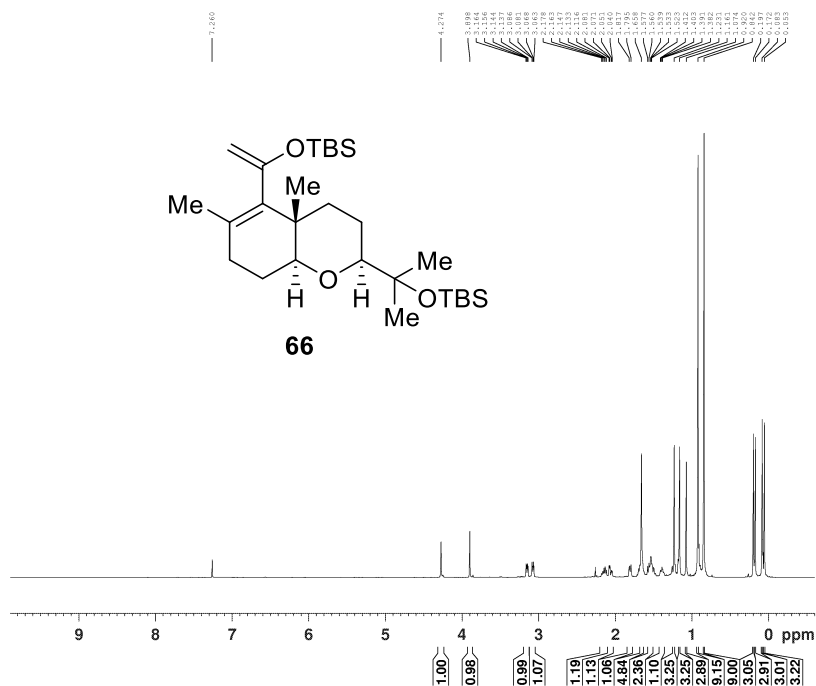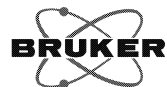

Current Data Parameters  
 NAME rjs-1221 Pure  
 EXPNO 1  
 PROCNO 1

F2 - Acquisition Parameter  
 Date\_ 20150317  
 Time 6.30  
 INSTRUM spect  
 PROBHD 5 mm CPQNP 1H/  
 PULPROG zg30  
 TD 65536  
 SOLVENT CDCl3  
 NS 16  
 DS 2  
 SWH 12019.230 Hz  
 FIDRES 0.183399 Hz  
 AQ 2.7262976 se  
 RG 25.4  
 DW 41.600 us  
 DE 10.00 us  
 TE 298.2 K  
 D1 1.00000000 se  
 TD0 1

===== CHANNEL f1 =====  
 SF01 600.1337060 MH  
 NUC1 1H  
 P1 13.00 us  
 PLW1 9.00000000 W

F2 - Processing parameters  
 SI 65536  
 SF 600.1300174 MH  
 WDW EM  
 SSB 0  
 LB 0.30 Hz  
 GB 0  
 FC 1.00

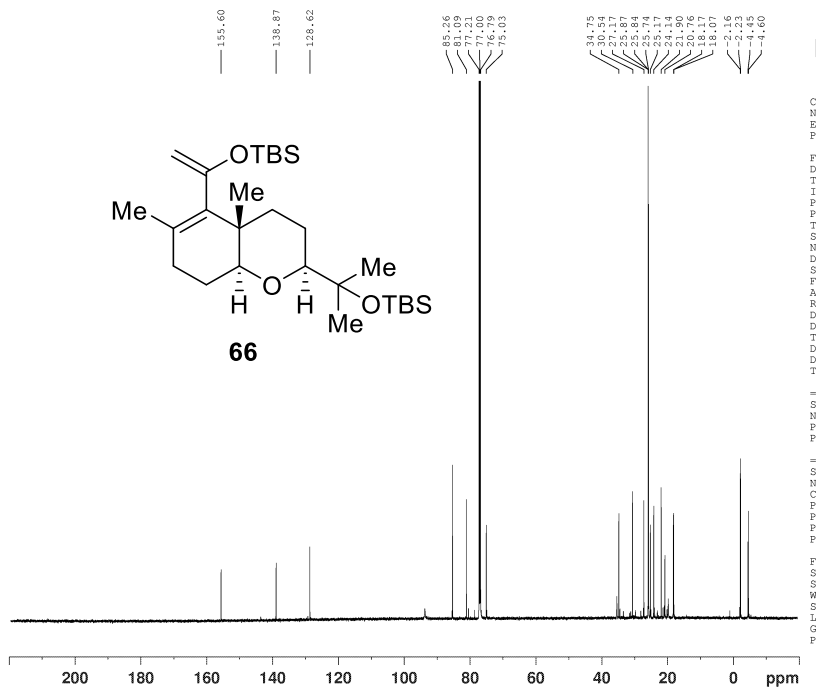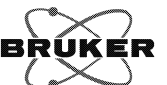

Current Data Parameters  
 NAME rjs-1221 Pure Carbon  
 EXPNO 1  
 PROCNO 1

F2 - Acquisition Parameters  
 Date\_ 20150317  
 Time 6.33  
 INSTRUM spect  
 PROBHD 5 mm CPQNP 1H/  
 PULPROG zgpg30  
 TD 65536  
 SOLVENT CDCl3  
 NS 67  
 DS 4  
 SWH 36057.691 Hz  
 FIDRES 0.550197 Hz  
 AQ 0.9087659 sec  
 RG 203  
 DW 13.867 usec  
 DE 18.00 usec  
 TE 298.1 K  
 D1 2.00000000 sec  
 D11 0.03000000 sec  
 TD0 1

===== CHANNEL f1 =====  
 SF01 150.9178981 MHz  
 NUC1 13C  
 P1 11.00 usec  
 PLW1 30.00000000 W

===== CHANNEL f2 =====  
 SF02 600.1324005 MHz  
 NUC2 1H  
 CPDPRG2 waltz16  
 FPCD2 80.00 usec  
 PLW2 9.00000000 W  
 PLW12 0.26587000 W  
 PLW13 0.17016000 W

F2 - Processing parameters  
 SI 32768  
 SF 150.9028118 MHz  
 WDW EM  
 SSB 0  
 LB 1.00 Hz  
 GB 0  
 FC 1.40



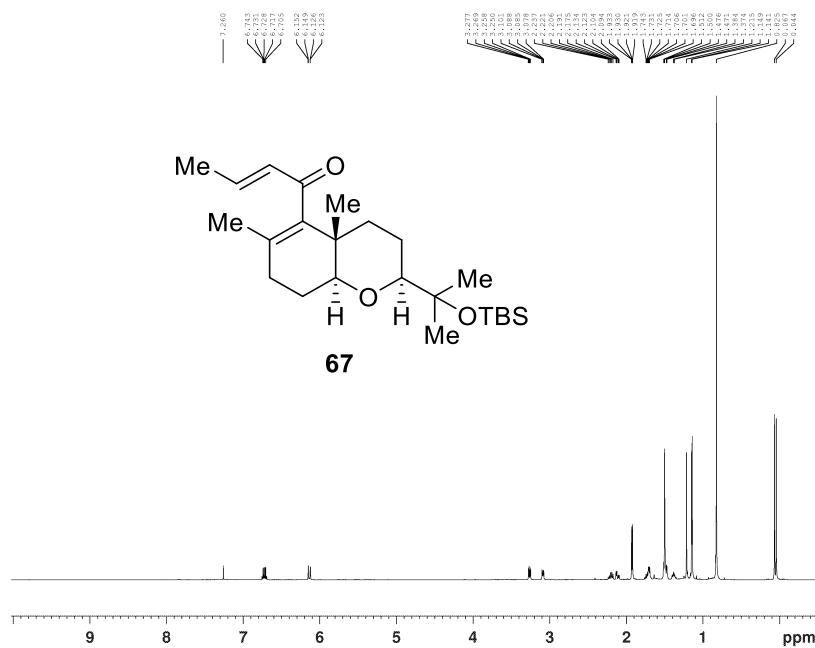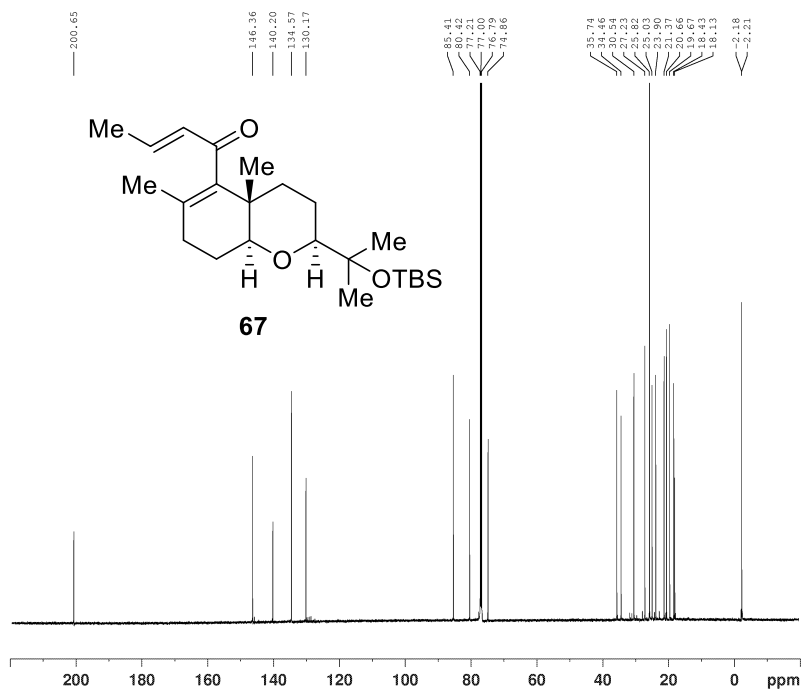



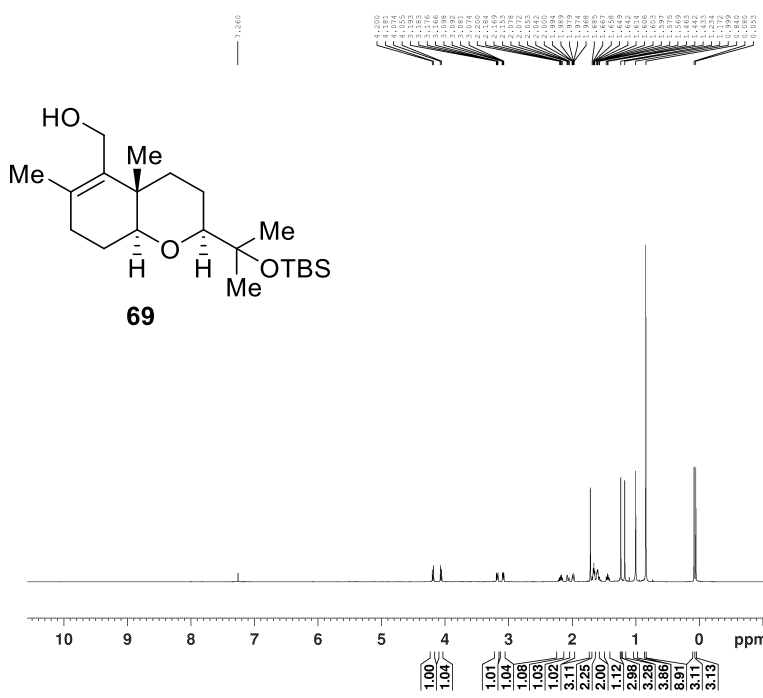

**BRUKER**

Current Data Parameters  
 NAME rjs-0769 Pure Proton  
 EXPNO 1  
 PROCNO 1

F2 - Acquisition Parameters  
 Date\_ 20150120  
 Time 11.11  
 INSTRUM spect  
 PROBHD 5 mm CPQNP 1H/  
 PULPROG zg30  
 TD 65536  
 SOLVENT CDCl3  
 NS 20  
 DS 2  
 SWH 12019.230 Hz  
 FIDRES 0.183399 Hz  
 AQ 2.7262976 sec  
 RG 25.4  
 DW 41.600 usec  
 DE 10.00 usec  
 TE 298.0 K  
 DI 1.0000000 sec  
 TDO 1

==== CHANNEL f1 =====  
 SF01 600.1337060 MHz  
 NUC1 1H  
 P1 13.00 usec  
 PLW1 9.0000000 W

F2 - Processing parameters  
 SI 65536  
 SF 600.130166 MHz  
 WDW EM  
 SSB 0  
 LB 0.30 Hz  
 GB 0  
 PC 1.00

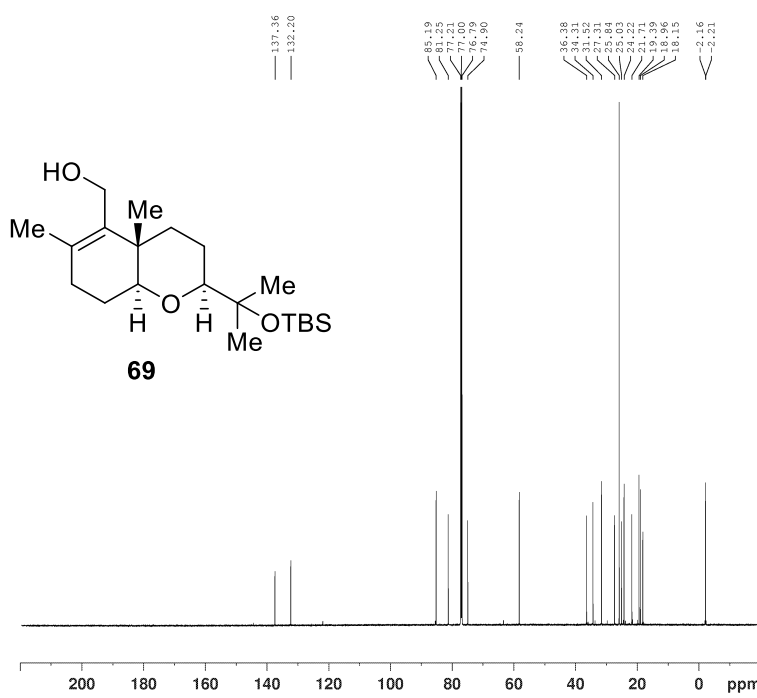

**BRUKER**

Current Data Parameters  
 NAME rjs-0769 Pure Carbon  
 EXPNO 1  
 PROCNO 1

F2 - Acquisition Parameters  
 Date\_ 20150120  
 Time 11.15  
 INSTRUM spect  
 PROBHD 5 mm CPQNP 1H/  
 PULPROG zgpg30  
 TD 65536  
 SOLVENT CDCl3  
 NS 51  
 DS 4  
 SWH 36057.691 Hz  
 FIDRES 0.550197 Hz  
 AQ 0.9087659 sec  
 RG 203  
 DW 13.867 usec  
 DE 18.00 usec  
 TE 298.1 K  
 D1 2.0000000 sec  
 D11 0.0300000 sec  
 TDO 1

==== CHANNEL f1 =====  
 SF01 150.9178981 MHz  
 NUC1 13C  
 P1 11.00 usec  
 PLW1 30.0000000 W

==== CHANNEL f2 =====  
 SF02 600.1324005 MHz  
 NUC2 1H  
 CPDPRG2 waltz16  
 PCPD2 80.00 usec  
 PLW2 9.0000000 W  
 PLW12 0.36587000 W  
 PLW13 0.17016000 W

F2 - Processing parameters  
 SI 32768  
 SF 150.9028140 MHz  
 WDW EM  
 SSB 0  
 LB 1.00 Hz  
 GB 0  
 PC 1.40

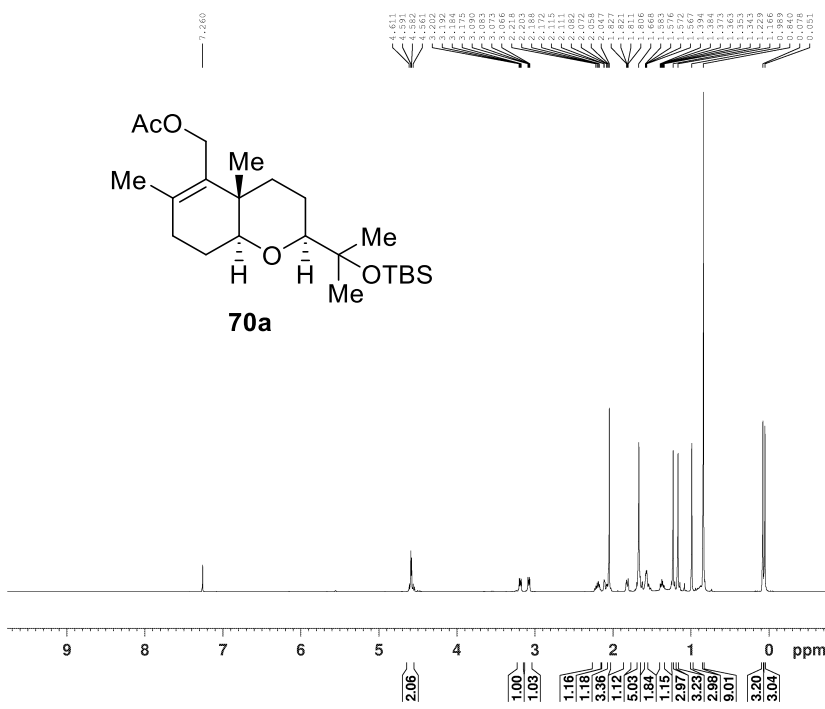

**BRUKER**

Current Data Parameters  
 NAME rjs-1245 Pure  
 EXPNO 1  
 PROCNO 1

F2 - Acquisition Parameter  
 Date\_ 20150406  
 Time 11.15  
 INSTRUM spect  
 PROBHD 5 mm CPQNP 1H/  
 PULPROG zg30  
 TD 65536  
 SOLVENT CDCl3  
 NS 16  
 DS 2  
 SWH 12019.230 Hz  
 FIDRES 0.183399 Hz  
 AQ 2.7262976 se  
 RG 25.4  
 DW 41.600 us  
 DE 10.00 us  
 TE 298.1 K  
 D1 1.00000000 se  
 TDO 1

==== CHANNEL f1 =====  
 SFO1 600.1337060 MH  
 NUC1 1H  
 P1 13.00 us  
 PLW1 9.00000000 W

F2 - Processing parameters  
 SI 65536  
 SF 600.1300149 MH  
 WDW EM  
 SSB 0  
 LB 0.30 Hz  
 GB 0  
 PC 1.00

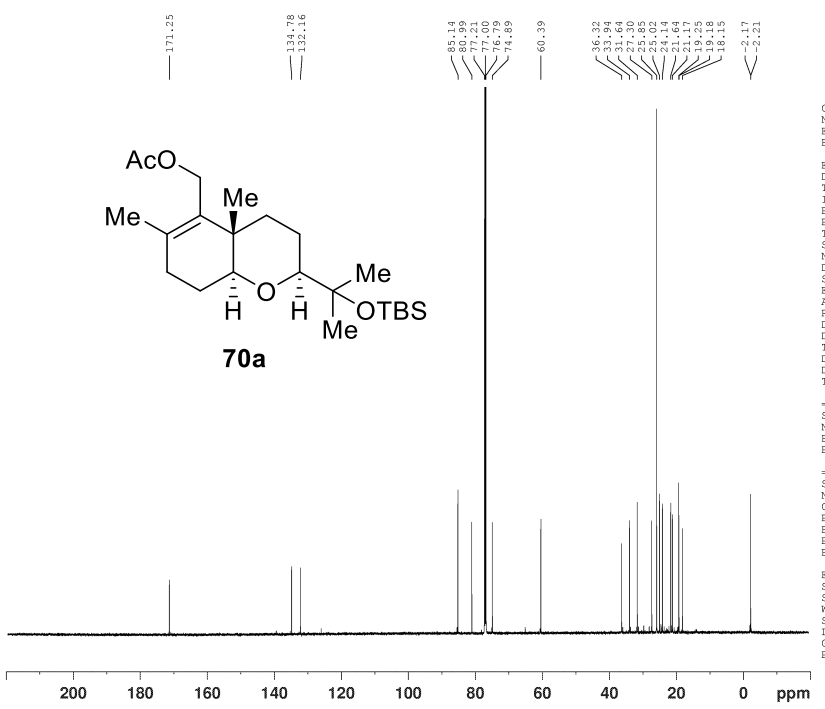

**BRUKER**

Current Data Parameters  
 NAME rjs-1245 Pure Carbon  
 EXPNO 1  
 PROCNO 1

F2 - Acquisition Parameters  
 Date\_ 20150406  
 Time 11.17  
 INSTRUM spect  
 PROBHD 5 mm CPQNP 1H/  
 PULPROG zgpg30  
 TD 65536  
 SOLVENT CDCl3  
 NS 4  
 DS 4  
 SWH 36057.691 Hz  
 FIDRES 0.550197 Hz  
 AQ 0.9087659 sec  
 RG 203  
 DW 13.867 usec  
 DE 18.00 usec  
 TE 298.2 K  
 D1 2.00000000 sec  
 D11 0.03000000 sec  
 TDO 1

==== CHANNEL f1 =====  
 SFO1 150.9178981 MH  
 NUC1 13C  
 P1 11.00 usec  
 PLW1 30.00000000 W

==== CHANNEL f2 =====  
 SFO2 600.1324005 MH  
 NUC2 1H  
 CPOPRG2 waltz16  
 PCPD2 80.00 usec  
 PLW2 9.00000000 W  
 PLW12 0.25570000 W  
 PLW13 0.17016000 W

F2 - Processing parameters  
 SI 32768  
 SF 150.9028129 MH  
 WDW EM  
 SSB 0  
 LB 1.00 Hz  
 GB 0  
 PC 1.40

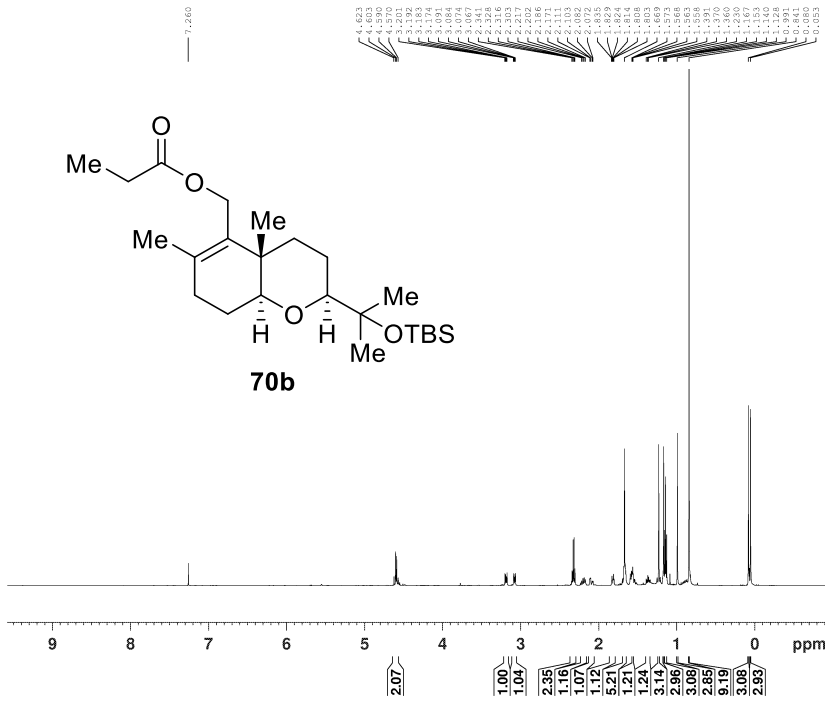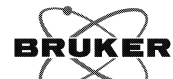

Current Data Parameters  
 NAME rjs-1238  
 EXPNO 1  
 PROCNO 1

F2 - Acquisition Parameter  
 Date\_ 20150324  
 Time 13.45  
 INSTRUM spect  
 PROBHD 5 mm CPQNP 1H/  
 PULPROG zg30  
 TD 65536  
 SOLVENT CDCl3  
 NS 16  
 DS 2  
 SWH 12019.230 Hz  
 FIDRES 0.183399 Hz  
 AQ 2.7262976 se  
 RG 32  
 DW 41.600 us  
 DE 10.00 us  
 TE 298.1 K  
 D1 1.0000000 se  
 TDO 1

===== CHANNEL f1 =====  
 SFO1 600.1337060 MHz  
 NUC1 1H  
 P1 13.00 us  
 PLW1 9.0000000 W

F2 - Processing parameters  
 SI 65536  
 SF 600.1300166 MHz  
 WDW EM  
 SSB 0  
 LB 0.30 Hz  
 GB 0  
 PC 1.00

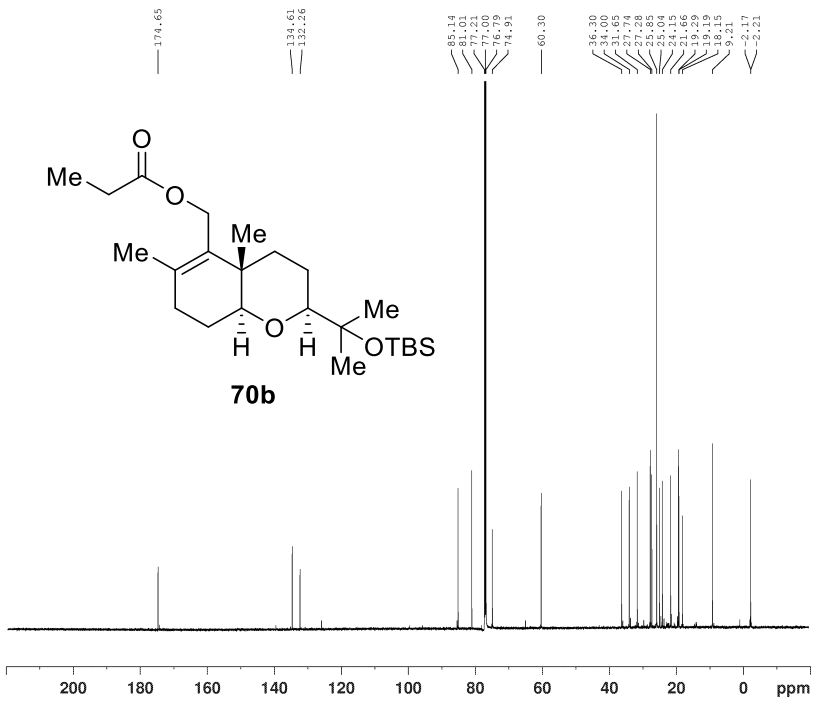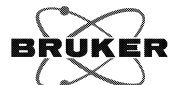

Current Data Parameters  
 NAME rjs-1238  
 EXPNO 2  
 PROCNO 1

F2 - Acquisition Parameters  
 Date\_ 20150324  
 Time 13.52  
 INSTRUM spect  
 PROBHD 5 mm CPQNP 1H/  
 PULPROG zgpg30  
 TD 65536  
 SOLVENT CDCl3  
 NS 128  
 DS 4  
 SWH 36057.691 Hz  
 FIDRES 0.550197 Hz  
 AQ 0.9087659 sec  
 RG 203  
 DW 13.867 usec  
 DE 18.00 usec  
 TE 298.2 K  
 D1 2.0000000 sec  
 D11 0.0300000 sec  
 TDO 1

===== CHANNEL f1 =====  
 SFO1 150.9178981 MHz  
 NUC1 13C  
 P1 11.00 usec  
 PLW1 30.0000000 W

===== CHANNEL f2 =====  
 SFO2 600.1324005 MHz  
 NUC2 1H  
 CPDPRG2 waltz16  
 PCPD2 80.00 usec  
 PLW2 9.0000000 W  
 PLW12 0.26587000 W  
 PLW13 0.17016000 W

F2 - Processing parameters  
 SI 32768  
 SF 150.9028129 MHz  
 WDW EM  
 SSB 0  
 LB 1.00 Hz  
 GB 0  
 PC 1.40

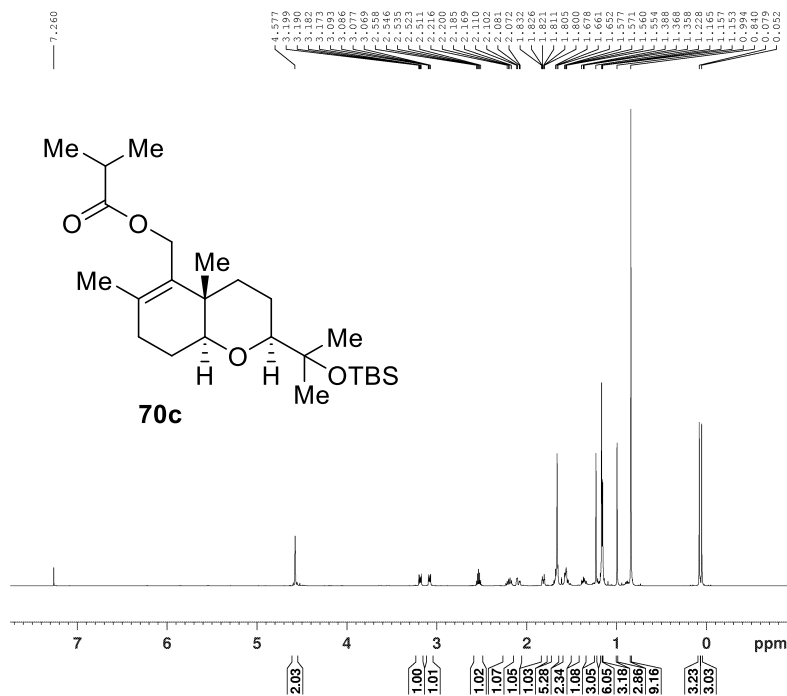

**BRUKER**

Current Data Parameters  
 NAME rjs-0771 Pure proton  
 EXPNO 1  
 PROCNO 1

F2 - Acquisition Parameters  
 Date\_ 20150121  
 Time 8.13  
 INSTRUM spect  
 PROBHD 5 mm CPQNP 1H/  
 PULPROG zgpg30  
 TD 65536  
 SOLVENT CDCl3  
 NS 9  
 DS 2  
 SWH 12019.230 Hz  
 FIDRES 0.183399 Hz  
 AQ 2.732976 sec  
 RG 25.4  
 DW 41.600 usec  
 DE 10.00 usec  
 TE 298.0 K  
 D1 1.0000000 sec  
 TDO 1

==== CHANNEL f1 =====  
 SF01 600.1337060 MHz  
 NUC1 1H  
 P1 13.00 usec  
 PLW1 9.00000000 W

F2 - Processing parameters  
 SI 65536  
 SF 600.1300173 MHz  
 WDN EM  
 SSB 0  
 LB 0 0.30 Hz  
 GB 0  
 PC 1.00

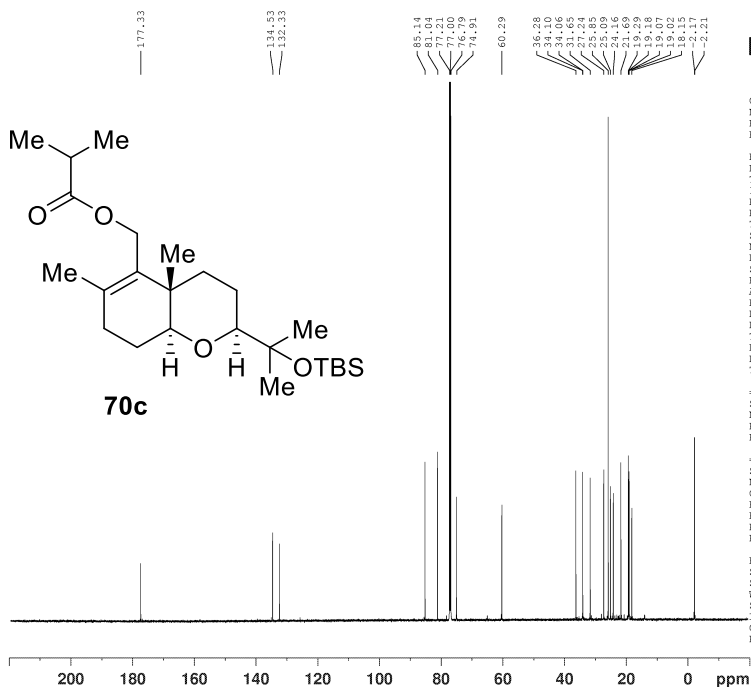

**BRUKER**

Current Data Parameters  
 NAME rjs-0771 Pure Carbon  
 EXPNO 1  
 PROCNO 1

F2 - Acquisition Parameters  
 Date\_ 20150121  
 Time 8.17  
 INSTRUM spect  
 PROBHD 5 mm CPQNP 1H/  
 PULPROG zgpg30  
 TD 65536  
 SOLVENT CDCl3  
 NS 49  
 DS 4  
 SWH 36057.691 Hz  
 FIDRES 0.550197 Hz  
 AQ 0.9087659 sec  
 RG 203  
 DW 13.867 usec  
 DE 18.00 usec  
 TE 298.1 K  
 D1 2.0000000 sec  
 D11 0.03000000 sec  
 TDO 1

==== CHANNEL f1 =====  
 SF01 150.9178981 MHz  
 NUC1 13C  
 P1 11.00 usec  
 PLW1 30.00000000 W

==== CHANNEL f2 =====  
 SF02 600.1324005 MHz  
 NUC2 1H  
 CPDPRG12 waltz16  
 PCPD2 80.00 usec  
 PLW2 9.00000000 W  
 PLW12 0.26587000 W  
 PLW13 0.17016000 W

F2 - Processing parameters  
 SI 32768  
 SF 150.9028129 MHz  
 WDN EM  
 SSB 0  
 LB 0 1.00 Hz  
 GB 0  
 PC 1.40

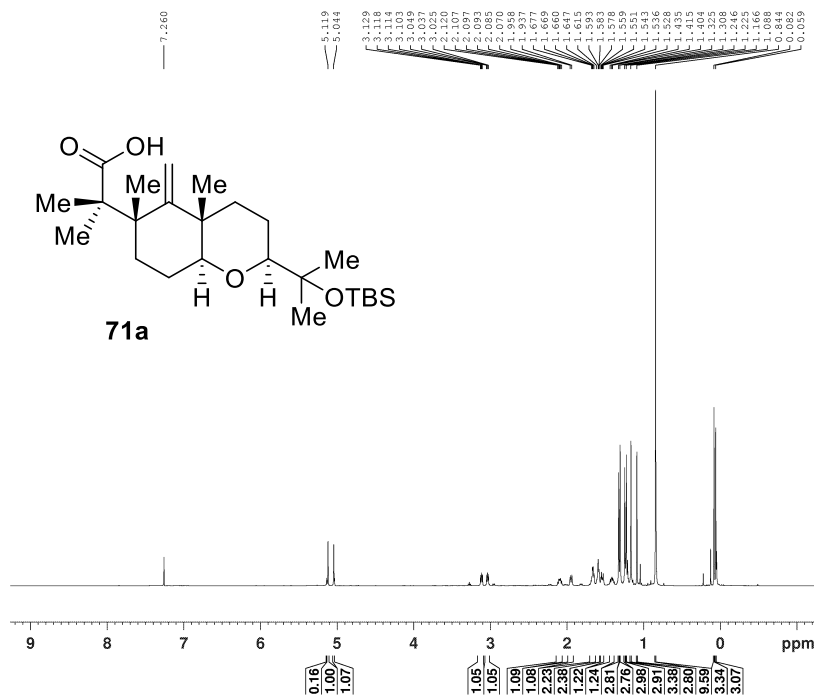

Current Data Parameters  
 NAME rjs-2417 Pure  
 EXPNO 1  
 PROCNO 1

F2 - Acquisition Parameter  
 Date\_ 20150210  
 Time 10.36  
 INSTRUM spect  
 PROBHD 5 mm CPQNP 1H/  
 PULPROG zg30  
 TD 65536  
 SOLVENT CDCl3  
 NS 22  
 DS 2  
 SWH 12019.230 Hz  
 FIDRES 0.183399 Hz  
 AQ 2.7262976 se  
 RG 16  
 DW 41.600 us  
 DE 10.00 us  
 TE 298.1 K  
 D1 1.00000000 se  
 TD0 1

==== CHANNEL f1 =====  
 SF01 600.1337060 MH  
 NUC1 1H  
 P1 13.00 us  
 PLW1 9.00000000 W

F2 - Processing parameters  
 SI 65536  
 SF 600.1300157 MH  
 WDW EM  
 SSB 0  
 LB 0.30 Hz  
 GB 0  
 PC 1.00

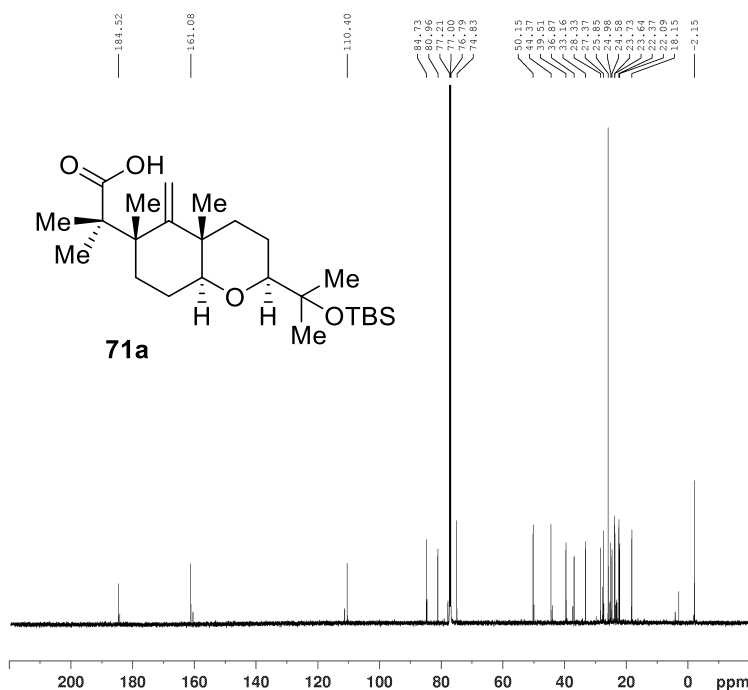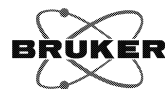

Current Data Parameters  
 NAME rjs-0773 Pure Carbon  
 EXPNO 1  
 PROCNO 1

F2 - Acquisition Parameters  
 Date\_ 20150122  
 Time 9.07  
 INSTRUM spect  
 PROBHD 5 mm CPQNP 1H/  
 PULPROG zgpg30  
 TD 65536  
 SOLVENT CDCl3  
 NS 49  
 DS 4  
 SWH 36057.691 Hz  
 FIDRES 0.550197 Hz  
 AQ 0.9087659 sec  
 RG 203  
 DW 13.867 usec  
 DE 18.00 usec  
 TE 298.0 K  
 D1 2.00000000 sec  
 D11 0.03000000 sec  
 TD0 1

==== CHANNEL f1 =====  
 SF01 150.9178981 MH  
 NUC1 13C  
 P1 11.00 usec  
 PLW1 30.00000000 W

==== CHANNEL f2 =====  
 SF02 600.1324005 MH  
 NUC2 1H  
 CPDPRG12 waltz16  
 PCPD2 80.00 usec  
 PLW2 9.00000000 W  
 PLW12 0.26587000 W  
 PLW13 0.17016000 W

F2 - Processing parameters  
 SI 32768  
 SF 150.9028129 MH  
 WDW EM  
 SSB 0  
 LB 1.00 Hz  
 GB 0  
 PC 1.40

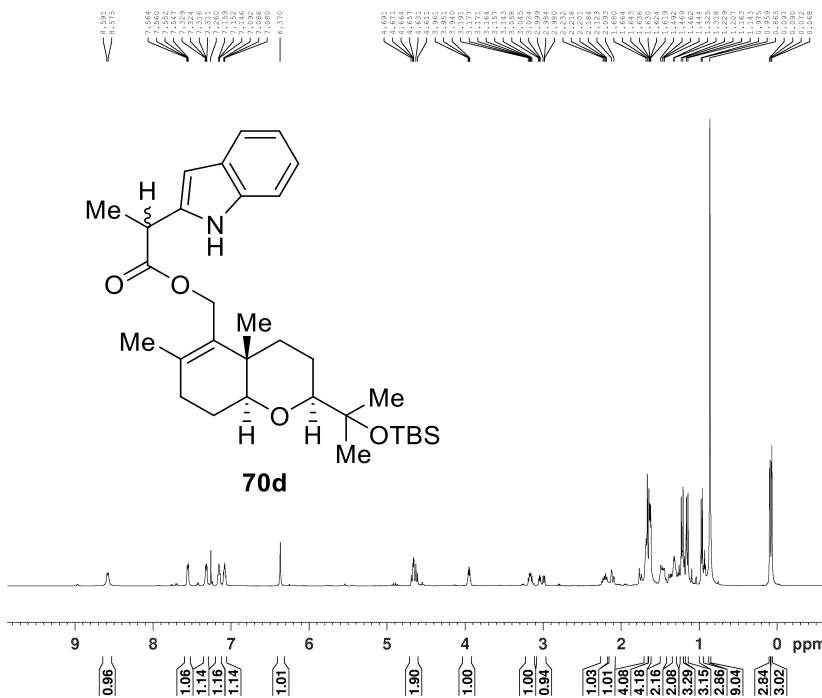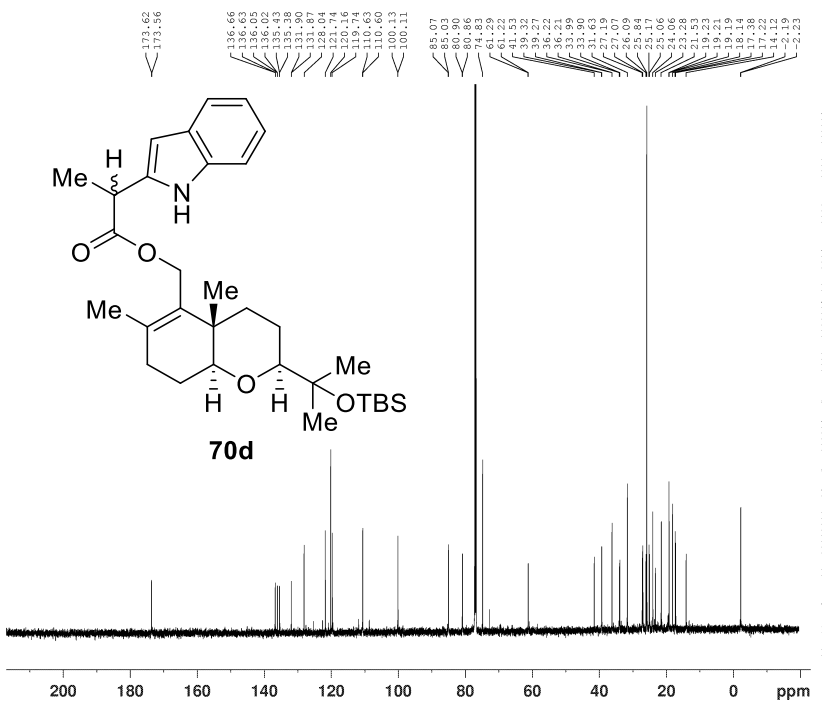



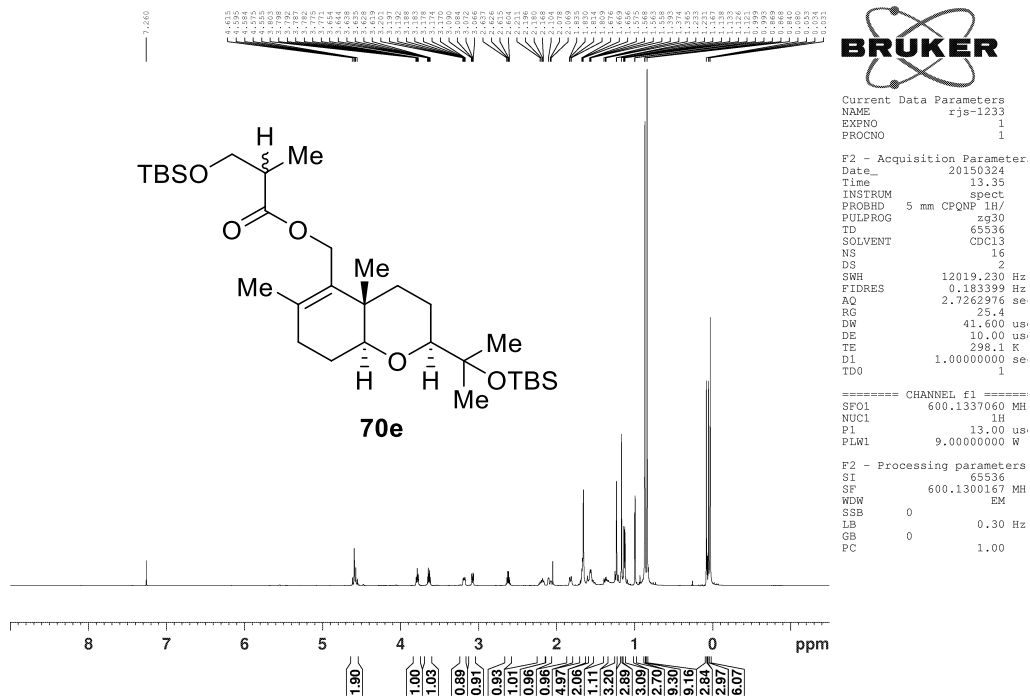

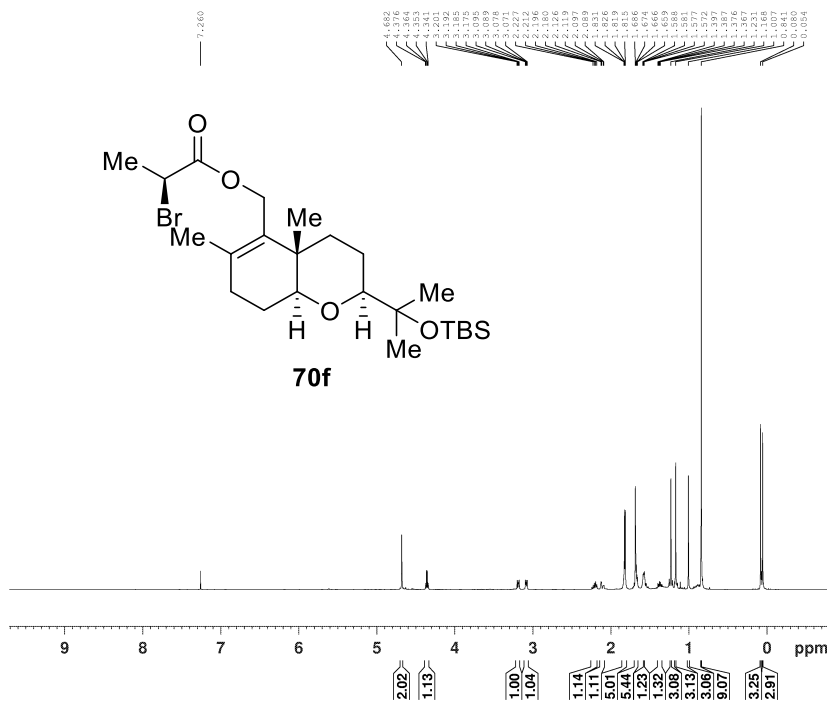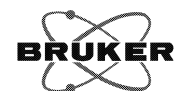

Current Data Parameters  
 NAME rjs-1244 Pure  
 EXPNO 1  
 PROCNO 1

F2 - Acquisition Parameters  
 Date\_ 20150406  
 Time 11.08  
 INSTRUM spect  
 PROBHD 5 mm CPQNP 1H/  
 PULPROG zg30  
 TD 65536  
 SOLVENT CDCl3  
 NS 20  
 DS 2  
 SWH 12019.230 Hz  
 FIDRES 0.183399 Hz  
 AQ 2.7262976 se  
 RG 32  
 DW 41.600 us  
 DE 10.00 us  
 TE 298.2 K  
 D1 1.00000000 se  
 TDO 1

===== CHANNEL f1 =====  
 SF01 600.1337060 MH  
 NUC1 1H  
 P1 13.00 us  
 PLW1 9.00000000 W

F2 - Processing parameters  
 SI 65536  
 SF 600.1300151 MH  
 SE EM  
 WDW 0  
 SSB 0 0.30 Hz  
 GB 0  
 PC 1.00

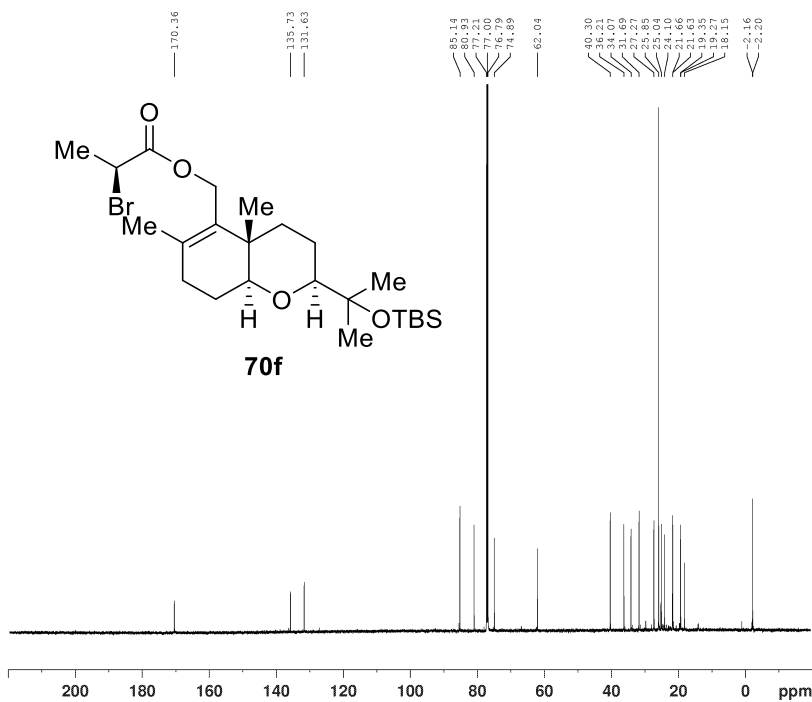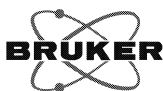

Current Data Parameters  
 NAME rjs-1244 Pure Carbon  
 EXPNO 1  
 PROCNO 1

F2 - Acquisition Parameters  
 Date\_ 20150406  
 Time 11.11  
 INSTRUM spect  
 PROBHD 5 mm CPQNP 1H/  
 PULPROG zgpg30  
 TD 65536  
 SOLVENT CDCl3  
 NS 52  
 DS 4  
 SWH 36057.691 Hz  
 FIDRES 0.550197 Hz  
 AQ 0.9087659 sec  
 RG 203  
 DW 13.661 usec  
 DE 18.00 usec  
 TE 298.2 K  
 D1 2.00000000 sec  
 D11 0.03000000 sec  
 TDO 1

===== CHANNEL f1 =====  
 SF01 150.9178981 MHZ  
 NUC1 13C  
 P1 11.00 usec  
 PLW1 30.00000000 W

===== CHANNEL f2 =====  
 SF02 600.1324005 MHZ  
 NUC2 1H  
 CPDPRG2 waltz16  
 PCPD2 80.00 usec  
 PLW2 9.00000000 W  
 PLW12 0.26587000 W  
 PLW13 0.17016000 W

F2 - Processing parameters  
 SI 32768  
 SF 150.9028129 MHZ  
 SE EM  
 WDW 0  
 SSB 0 1.00 Hz  
 GB 0  
 PC 1.40



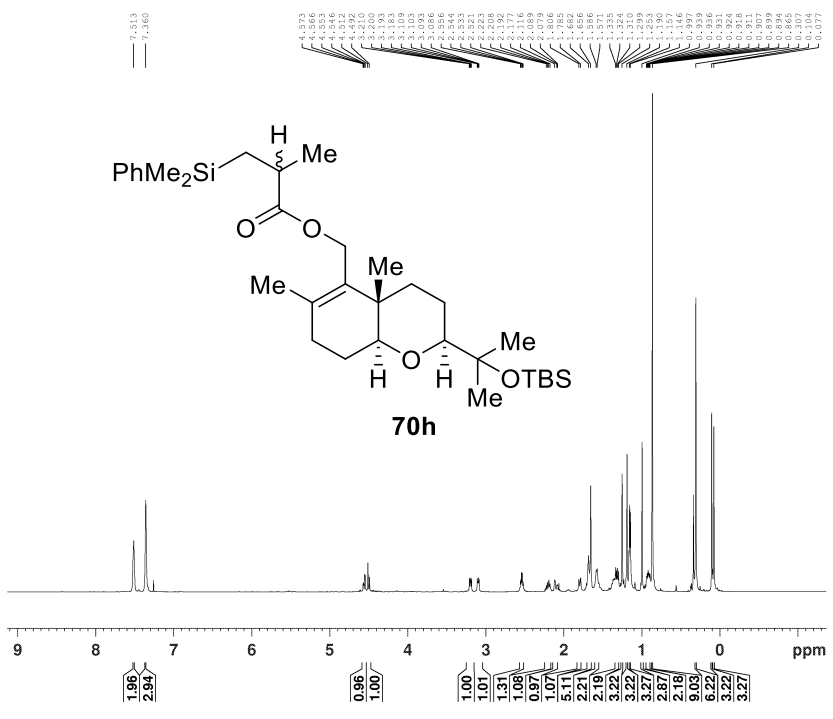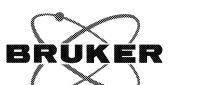

Current Data Parameters  
 NAME rjs-1232 Pure  
 EXPNO 1  
 PROCNO 1

F2 - Acquisition Parameters  
 Date\_ 20150323  
 Time 6.18  
 INSTRUM spect  
 PROBHD 5 mm CPQNP 1H/  
 PULPROG zg30  
 TD 65536  
 SOLVENT CDCl3  
 NS 16  
 DS 2  
 SWH 12019.230 Hz  
 FIDRES 0.183399 Hz  
 AQ 2.7262976 se  
 RG 12.7  
 DW 41.600 us  
 DE 10.00 us  
 TE 298.1 K  
 D1 1.00000000 se  
 TDO 1

==== CHANNEL f1 =====  
 SF01 600.1337060 MH  
 NUC1 1H  
 P1 13.00 us  
 PLW1 9.00000000 W

F2 - Processing parameters  
 SI 65536  
 SF 600.1300169 MH  
 SE EM  
 WDW 0  
 LB 0.30 Hz  
 GB 0  
 PC 1.00

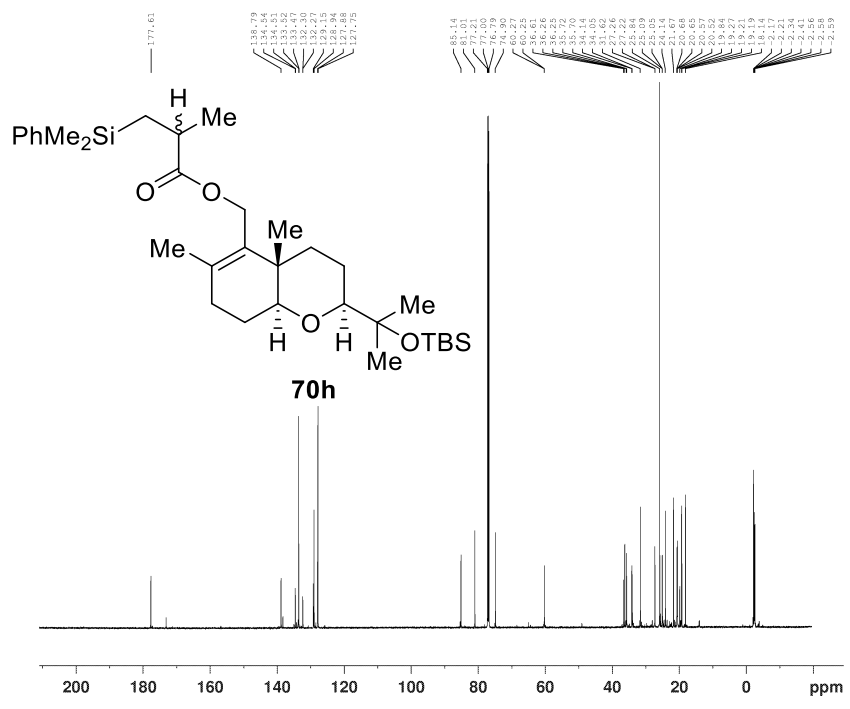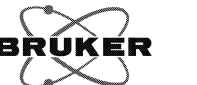

Current Data Parameters  
 NAME rjs-1234 Pure Carbon  
 EXPNO 1  
 PROCNO 1

F2 - Acquisition Parameters  
 Date\_ 20150323  
 Time 6.21  
 INSTRUM spect  
 PROBHD 5 mm CPQNP 1H/  
 PULPROG zgpg30  
 TD 65536  
 SOLVENT CDCl3  
 NS 56  
 DS 4  
 SWH 36057.691 Hz  
 FIDRES 0.550197 Hz  
 AQ 0.9087659 sec  
 RG 203  
 DW 13.867 usec  
 DE 18.00 usec  
 TE 298.2 K  
 D1 2.00000000 sec  
 D11 0.03000000 sec  
 TDO 1

==== CHANNEL f1 =====  
 SF01 150.9178981 MHZ  
 NUC1 13C  
 P1 11.00 usec  
 PLW1 30.00000000 W

==== CHANNEL f2 =====  
 SF02 600.1324005 MHZ  
 NUC2 1H  
 CPDPRG2 waltz16  
 PCPD2 80.00 usec  
 PLW2 9.00000000 W  
 PLW12 0.26587000 W  
 PLW13 0.17016000 W

F2 - Processing parameters  
 SI 32768  
 SF 150.9028184 MHZ  
 SE EM  
 WDW 0  
 LB 1.00 Hz  
 GB 0  
 PC 1.40

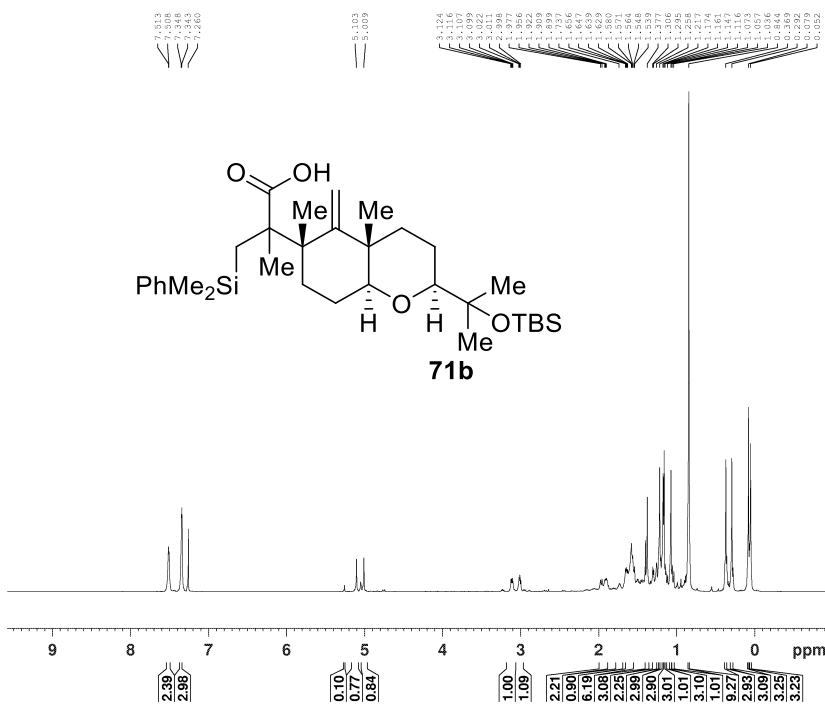

**BRUKER**

Current Data Parameters  
 NAME rjs-1242 Pure  
 EXPNO 1  
 PROCNO 1

F2 - Acquisition Parameters  
 Date\_ 20150406  
 Time 11.01  
 INSTRUM spect  
 PROBHD 5 mm CPQNP 1H/  
 PULPROG zg30  
 TD 65536  
 SOLVENT CDCl3  
 NS 19  
 DS 2  
 SWH 12019.230 Hz  
 FIDRES 0.183399 Hz  
 AQ 2.786396 sec  
 RG 32  
 DW 41.600 usec  
 DE 18.00 usec  
 TE 298.1 K  
 D1 1.00000000 sec  
 TD0 1

===== CHANNEL f1 =====  
 SFO1 600.1337060 MHz  
 NUC1 1H  
 P1 13.00 usec  
 PLW1 9.00000000 W

F2 - Processing parameters  
 SI 65536  
 SF 600.1300151 MHz  
 WDW EM  
 SSB 0  
 LB 0.30 Hz  
 GB 0  
 PC 1.00

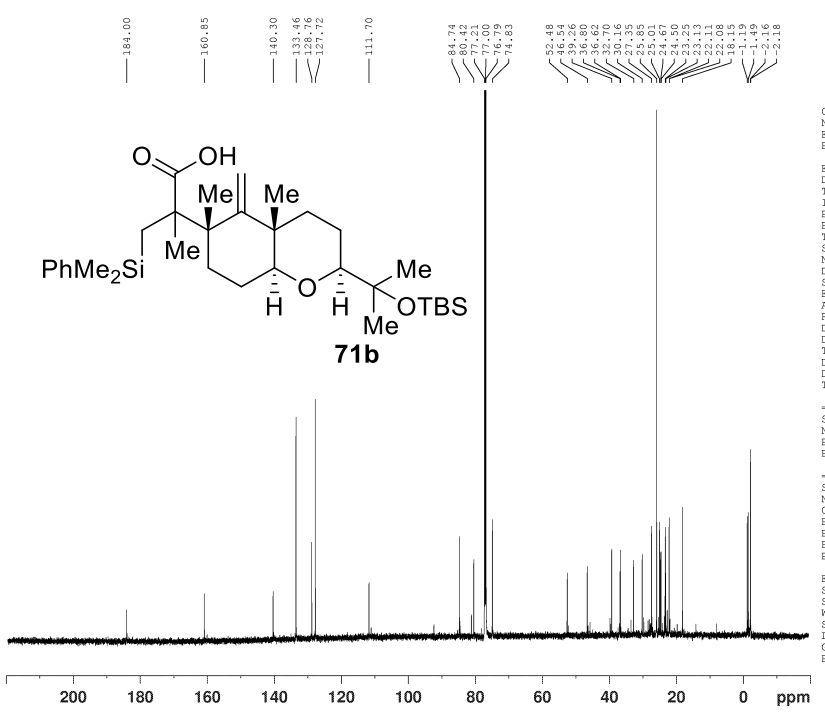

**BRUKER**

Current Data Parameters  
 NAME rjs-1242 Pure Carbon  
 EXPNO 1  
 PROCNO 1

F2 - Acquisition Parameters  
 Date\_ 20150406  
 Time 11.05  
 INSTRUM spect  
 PROBHD 5 mm CPQNP 1H/  
 PULPROG zgpg30  
 TD 65536  
 SOLVENT CDCl3  
 NS 61  
 DS 4  
 SWH 36057.691 Hz  
 FIDRES 0.550197 Hz  
 AQ 0.9087659 sec  
 RG 203  
 DW 13.867 usec  
 DE 18.00 usec  
 TE 298.1 K  
 D1 2.00000000 sec  
 D11 0.03000000 sec  
 TD0 1

===== CHANNEL f1 =====  
 SFO1 150.9178981 MHz  
 NUC1 13C  
 P1 11.00 usec  
 PLW1 30.00000000 W

===== CHANNEL f2 =====  
 SFO2 600.1324005 MHz  
 NUC2 1H  
 CPDPRG2 waltz16  
 PCPD2 80.00 usec  
 PLW2 9.00000000 W  
 PLW12 0.26587000 W  
 PLW13 0.17016000 W

F2 - Processing parameters  
 SI 32768  
 SF 150.9028129 MHz  
 WDW EM  
 SSB 0  
 LB 1.00 Hz  
 GB 0  
 PC 1.40

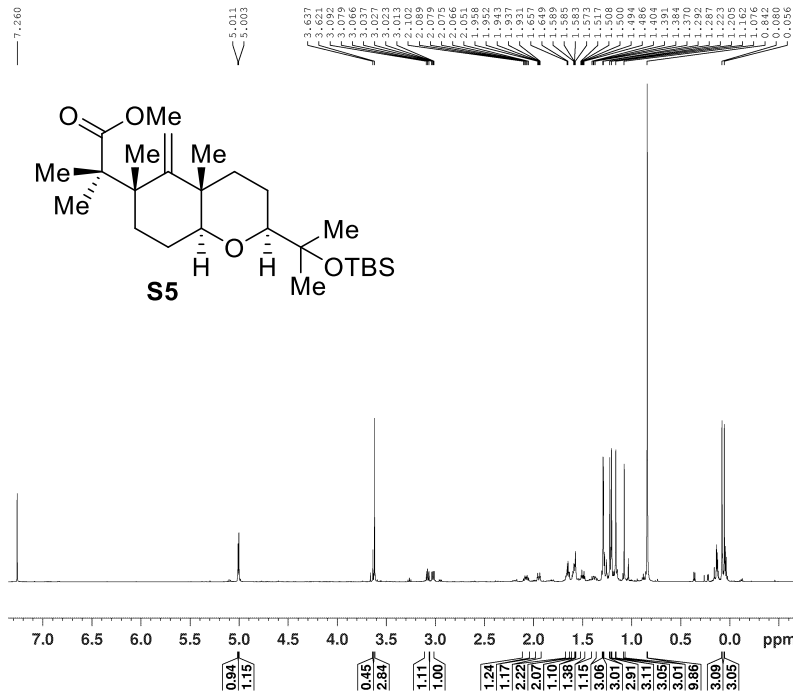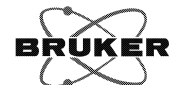

Current Data Parameters  
 NAME rjs-0775 Proton  
 EXPNO 1  
 PROCNO 1

F2 - Acquisition Parameters  
 Date\_ 20150123  
 Time 9.37  
 INSTRUM spect  
 PROBHD 5 mm CPQNP 1H/  
 PULPROG zg30  
 TD 65536  
 SOLVENT CDCl3  
 NS 25  
 DS 2  
 SWH 12019.230 Hz  
 FIDRES 0.183399 Hz  
 AQ 2.7262976 sec  
 RG 32  
 DW 41.600 usec  
 DE 10.00 usec  
 TE 298.1 K  
 D1 1.00000000 sec  
 TDO 1

==== CHANNEL f1 =====  
 SFO1 600.1337060 MHz  
 NUC1 1H  
 P1 13.00 usec  
 PLW1 9.00000000 W

F2 - Processing parameters  
 SI 65536  
 SF 600.1300171 MHz  
 WDW EM  
 SSB 0  
 LB 0.30 Hz  
 GB 0  
 PC 1.00

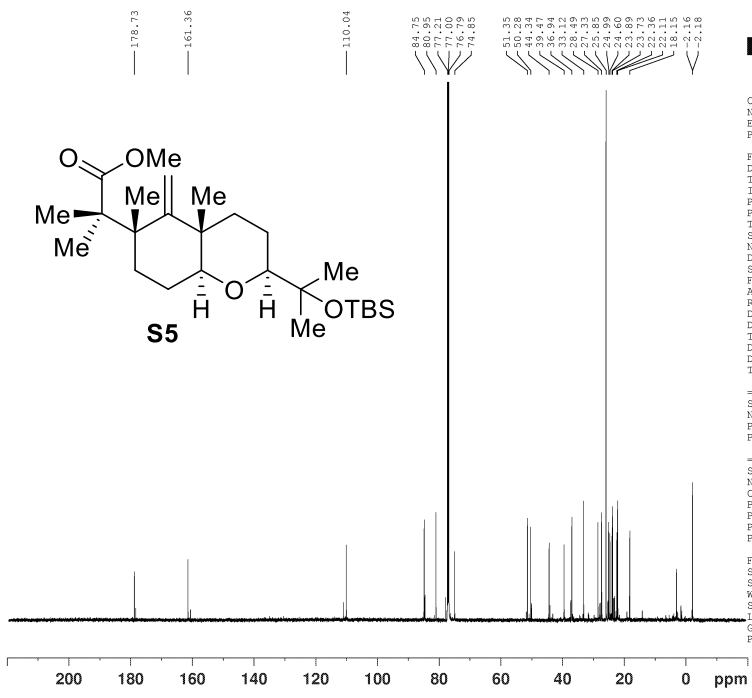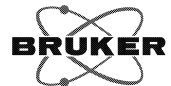

Current Data Parameters  
 NAME rjs-0775 Pure Carbon  
 EXPNO 1  
 PROCNO 1

F2 - Acquisition Parameters  
 Date\_ 20150123  
 Time 9.41  
 INSTRUM spect  
 PROBHD 5 mm CPQNP 1H/  
 PULPROG zgpg30  
 TD 65536  
 SOLVENT CDCl3  
 NS 84  
 DS 4  
 SWH 36057.691 Hz  
 FIDRES 0.550197 Hz  
 AQ 0.9087659 sec  
 RG 203  
 DW 13.867 usec  
 DE 18.00 usec  
 TE 298.1 K  
 D1 2.00000000 sec  
 D11 0.03000000 sec  
 TDO 1

==== CHANNEL f1 =====  
 SFO1 150.9178981 MHz  
 NUC1 13C  
 P1 11.00 usec  
 PLW1 30.00000000 W

==== CHANNEL f2 =====  
 SFO2 600.1324005 MHz  
 NUC2 1H  
 CPDPRG12 waltz16  
 PCPD2 80.00 usec  
 PLW2 9.00000000 W  
 PLW12 0.26587000 W  
 PLW13 0.17016000 W

F2 - Processing parameters  
 SI 32768  
 SF 150.9028129 MHz  
 WDW EM  
 SSB 0  
 LB 1.00 Hz  
 GB 0  
 PC 1.40



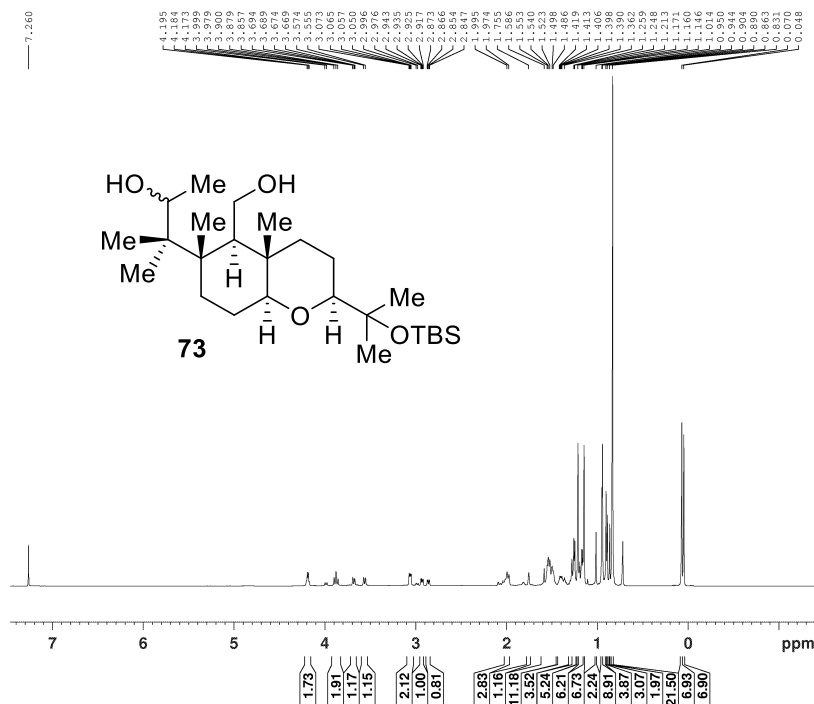

Current Data Parameters  
NAME rjs-0780 proton  
EXPNO 1  
PROCNO 1

F2 - Acquisition Parameter  
Date\_ 20150126  
Time 8.54  
INSTRUM spect  
PROBHD 5 mm CPQNP 1H/  
PULPROG zg30  
TD 65536  
SOLVENT CDCl3  
NS 25  
DS 2  
SWH 12019.230 Hz  
FIDRES 0.183299 Hz  
AQ 2.7262976 se  
RG 25.4  
DW 41.600 us  
DE 10.00 us  
TE 298.0 K  
D1 1.00000000 se  
TD0 1

===== CHANNEL f1 =====  
SF01 600.1337060 MH  
NUC1 1H  
P1 13.00 us  
PLW1 9.00000000 W

F2 - Processing parameters  
SI 65536  
SF 600.1300169 MH  
WDW EM  
SSB 0  
LB 0.30 Hz  
GB 0  
PC 1.00

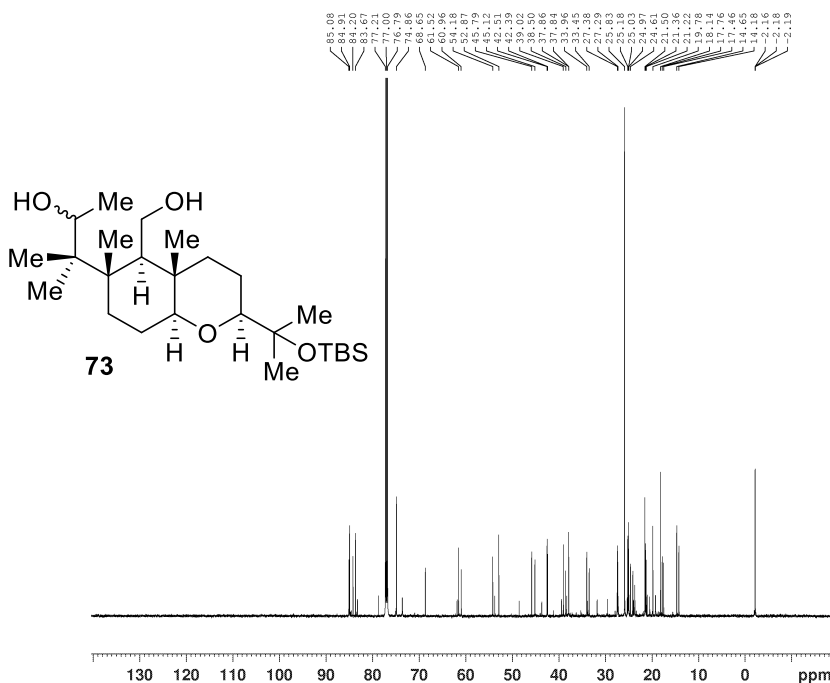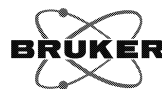

Current Data Parameters  
NAME rjs-0780 pure carbon  
EXPNO 1  
PROCNO 1

F2 - Acquisition Parameters  
Date\_ 20150126  
Time 8.50  
INSTRUM spect  
PROBHD 5 mm CPQNP 1H/  
PULPROG zgpg30  
TD 65536  
SOLVENT CDCl3  
NS 63  
DS 4  
SWH 36057.691 Hz  
FIDRES 0.550197 Hz  
AQ 0.9087659 sec  
RG 203  
DW 13.867 usec  
DE 18.00 usec  
TE 298.0 K  
D1 2.00000000 sec  
D11 0.03000000 sec  
TD0 1

===== CHANNEL f1 =====  
SF01 150.9178981 MHz  
NUC1 13C  
P1 11.00 usec  
PLW1 30.00000000 W

===== CHANNEL f2 =====  
SF02 600.1324005 MHz  
NUC2 1H  
CPDPRG12 waltz16  
PCPD2 80.00 usec  
PLW2 9.00000000 W  
PLW12 0.26587000 W  
PLW13 0.17016000 W

F2 - Processing parameters  
SI 32768  
SF 150.9028140 MHz  
WDW EM  
SSB 0  
LB 1.00 Hz  
GB 0  
PC 1.40





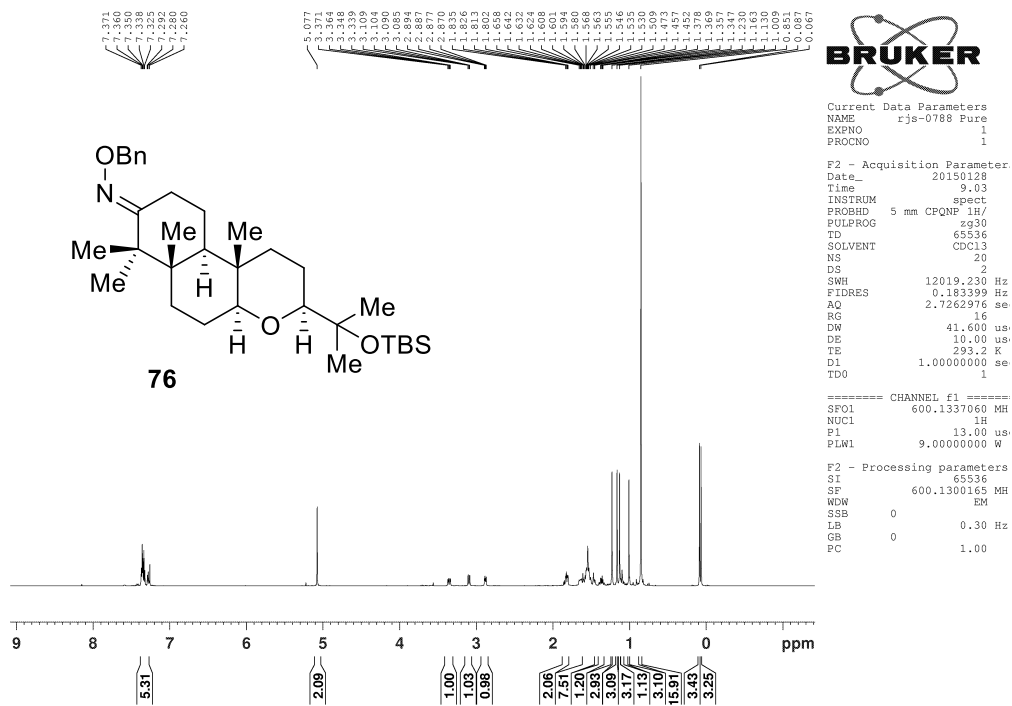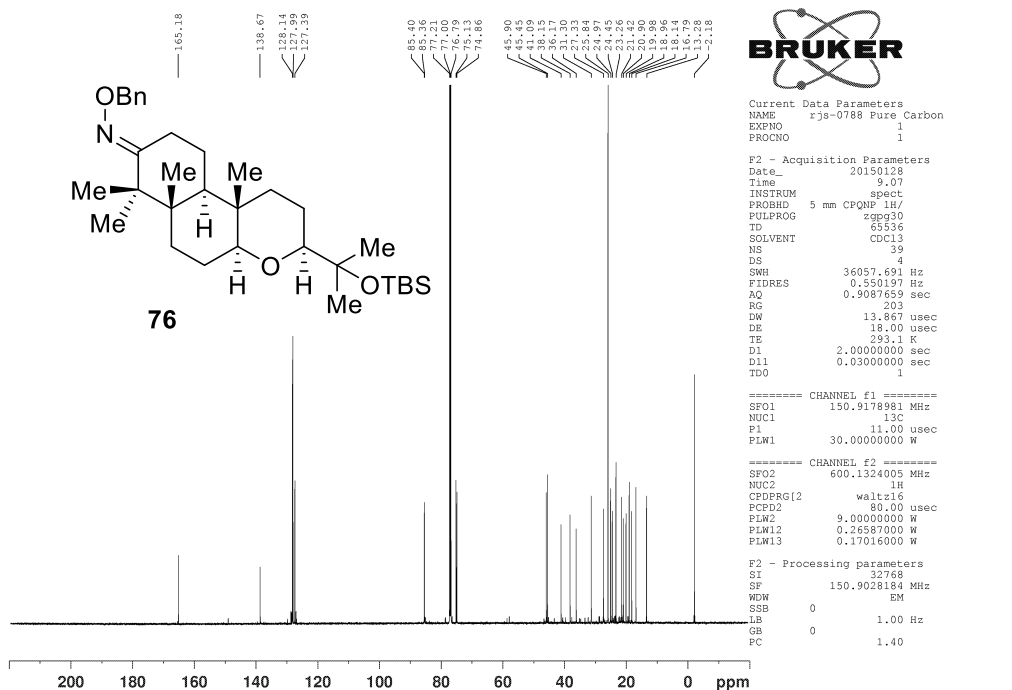

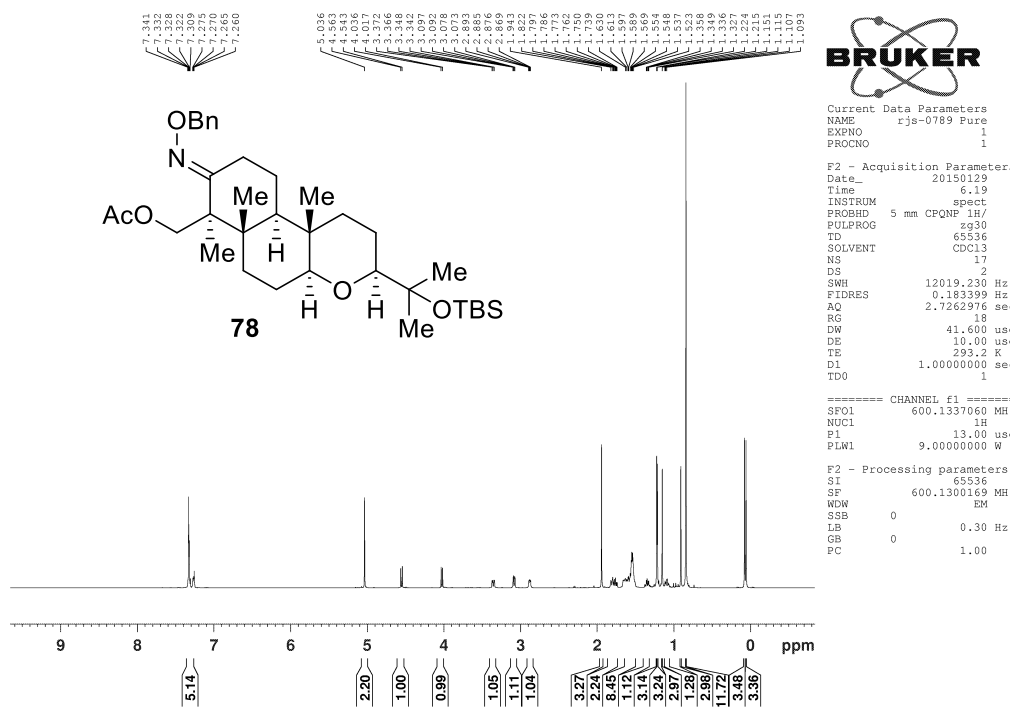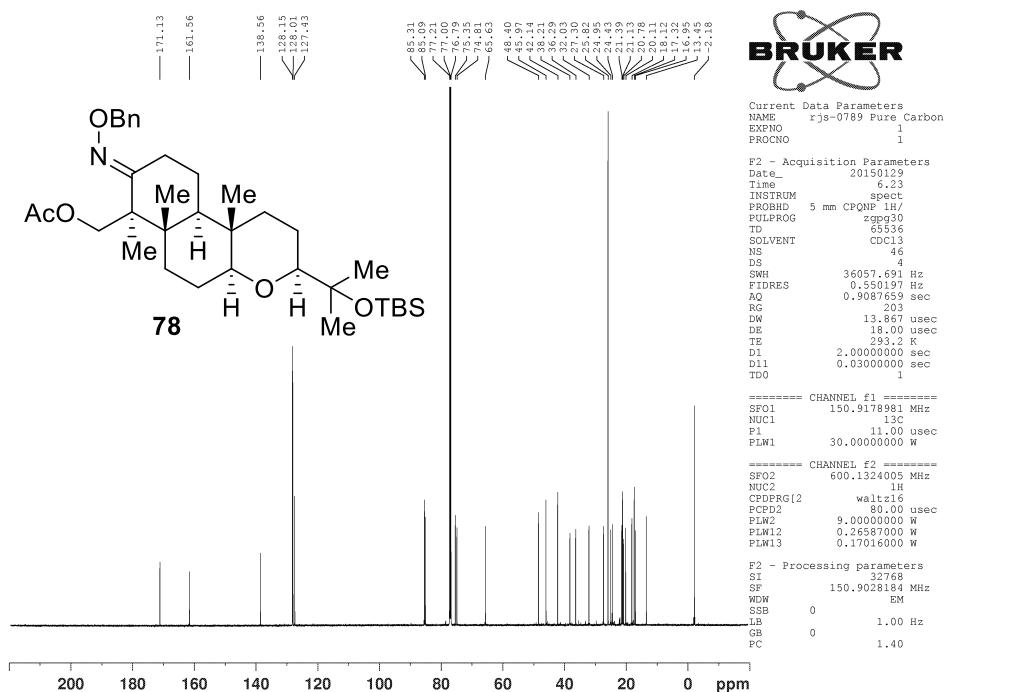

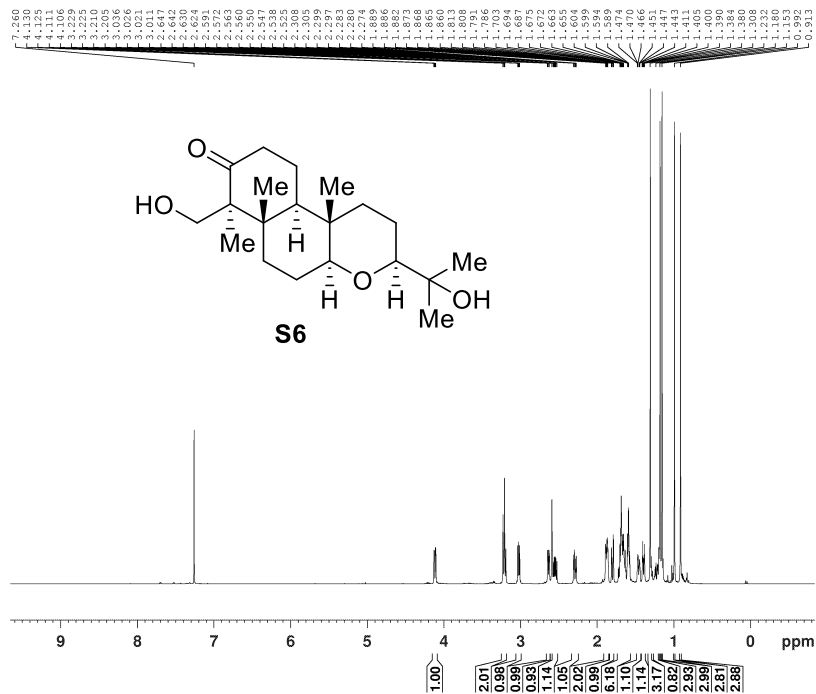

Current Data Parameters  
 NAME rjs-0791 PURE  
 EXPNO 1  
 PROCNO 1

F2 - Acquisition Parameter  
 Date\_ 20150130  
 Time 9.06  
 INSTRUM spect  
 PROBHD 5 mm CPQNP 1H/  
 PULPROG zg30  
 TD 65536  
 SOLVENT CDC13  
 NS 20  
 DS 2  
 SWH 12019.230 Hz  
 FIDRES 0.183399 Hz  
 AQ 2.7262976 se  
 RG 32  
 DW 41.600 us  
 DE 10.00 us  
 TE 293.2 K  
 D1 1.00000000 se  
 TD0 1

==== CHANNEL f1 =====  
 SF01 600.1337060 MH  
 NUC1 1H  
 P1 13.00 us  
 PLW1 9.00000000 W

F2 - Processing parameters  
 SI 65536  
 SF 600.1300164 MH  
 WDW EM  
 SSB 0  
 LB 0.30 Hz  
 GB 0  
 PC 1.00

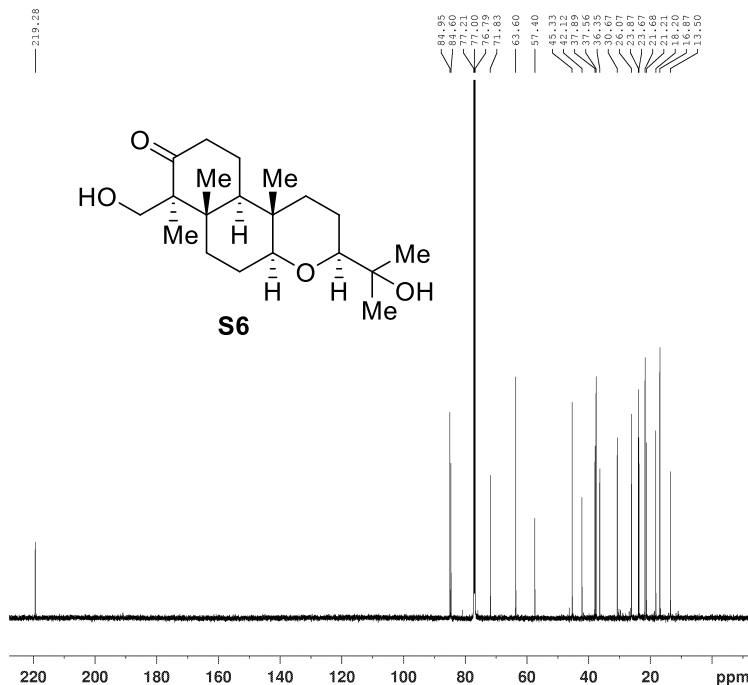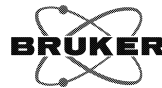

Current Data Parameters  
 NAME rjs-0791 Pure Carbon  
 EXPNO 1  
 PROCNO 1

F2 - Acquisition Parameters  
 Date\_ 20150130  
 Time 9.10  
 INSTRUM spect  
 PROBHD 5 mm CPQNP 1H/  
 PULPROG zgpg30  
 TD 65536  
 SOLVENT CDC13  
 NS 62  
 DS 4  
 SWH 42613.637 Hz  
 FIDRES 0.650232 Hz  
 AQ 0.7689557 sec  
 RG 203  
 DW 11.733 usec  
 DE 18.00 usec  
 TE 293.2 K  
 D1 2.00000000 sec  
 D11 0.03000000 sec  
 TD0 1

==== CHANNEL f1 =====  
 SF01 150.9178981 MH  
 NUC1 13C  
 P1 11.00 usec  
 PLW1 30.00000000 W

==== CHANNEL f2 =====  
 SF02 600.1324005 MH  
 NUC2 1H  
 CPDPRG12 waltz16  
 PCPD2 80.00 usec  
 PLW2 9.00000000 W  
 PLW12 0.26587000 W  
 PLW13 0.17016000 W

F2 - Processing parameters  
 SI 32768  
 SF 150.9028167 MH  
 WDW EM  
 SSB 0  
 LB 1.00 Hz  
 GB 0  
 PC 1.40

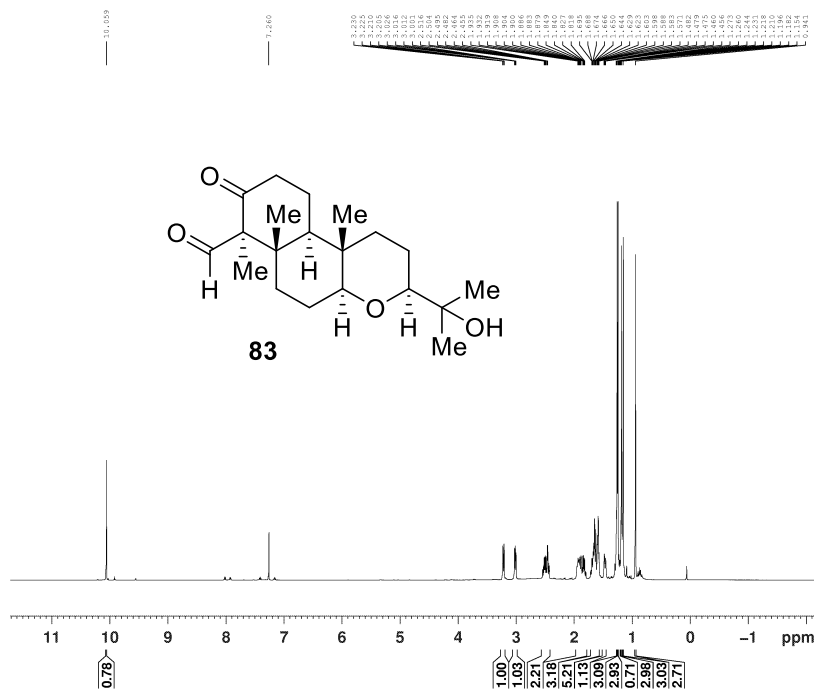

Current Data Parameters  
 NAME rjs-aldehyde prot.  
 EXPNO 1  
 PROCNO 1

F2 - Acquisition Parameter  
 Date\_ 20150114  
 Time 6.24  
 INSTRUM spect  
 PROBHD 5 mm CPQNP 1H/  
 PULPROG zg30  
 TD 65536  
 SOLVENT CDCl3  
 NS 27  
 DS 2  
 SWH 12019.230 Hz  
 FIDRES 0.183399 Hz  
 AQ 2.7262976 se  
 RG 32  
 DW 41.600 us  
 DE 10.00 us  
 TE 298.1 K  
 D1 1.00000000 se  
 TD0 1

===== CHANNEL f1 =====  
 SF01 600.1337060 MH  
 NUC1 1H  
 P1 13.00 us  
 PLW1 9.00000000 W

F2 - Processing parameters  
 SI 65536  
 SF 600.1300148 MH  
 WDW EM  
 SSB 0  
 LB 0.30 Hz  
 GB 0  
 PC 1.00

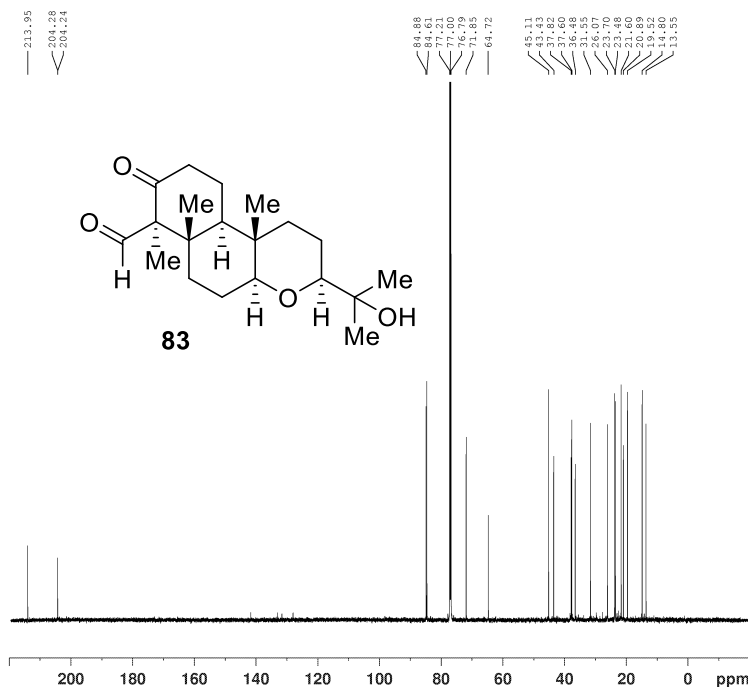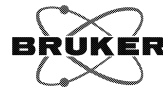

Current Data Parameters  
 NAME rjs-aldehyde Carbon  
 EXPNO 1  
 PROCNO 1

F2 - Acquisition Parameters  
 Date\_ 20150114  
 Time 6.27  
 INSTRUM spect  
 PROBHD 5 mm CPQNP 1H/  
 PULPROG zgpg30  
 TD 65536  
 SOLVENT CDCl3  
 NS 60  
 DS 4  
 SWH 36057.691 Hz  
 FIDRES 0.550197 Hz  
 AQ 0.9087659 sec  
 RG 203  
 DW 13.867 usec  
 DE 18.00 usec  
 TE 298.0 K  
 D1 2.00000000 sec  
 D11 0.03000000 sec  
 TD0 1

===== CHANNEL f1 =====  
 SF01 150.9178981 MHZ  
 NUC1 13C  
 P1 11.00 usec  
 PLW1 30.00000000 W

===== CHANNEL f2 =====  
 SF02 600.1324005 MHZ  
 NUC2 1H  
 CPDPRG2 waltz16  
 PCPD2 80.00 usec  
 PLW2 9.00000000 W  
 PLW12 0.26587000 W  
 PLW13 0.17016000 W

F2 - Processing parameters  
 SI 32768  
 SF 150.9028151 MHZ  
 WDW EM  
 SSB 0  
 LB 1.00 Hz  
 GB 0  
 PC 1.40

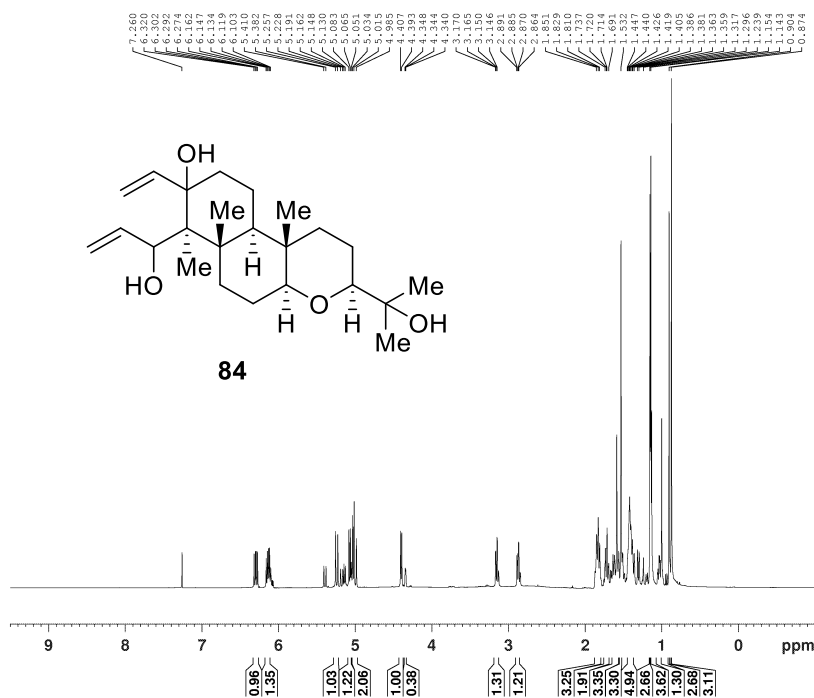

Current Data Parameters  
NAME rjs-0747 proton  
EXPNO 1  
PROCNO 1

F2 - Acquisition Parameter  
Date\_ 20150115  
Time 8.22  
INSTRUM spect  
PROBHD 5 mm CPQNP 1H/  
PULPROG zg30  
TD 65536  
SOLVENT CDCl3  
NS 16  
DS 2  
SWH 12019.230 Hz  
FIDRES 0.183399 Hz  
AQ 2.7262976 se  
RG 20.2  
DW 41.600 us  
DE 10.00 us  
TE 298.0 K  
D1 1.00000000 se  
TD0 1

===== CHANNEL f1 =====  
SFO1 600.1337060 MH  
NUC1 1H  
P1 13.00 us  
PLW1 9.00000000 W

F2 - Processing parameters  
SI 65536  
SF 600.1300151 MH  
WDW EM  
SSB 0  
LB 0.30 Hz  
GB 0  
PC 1.00

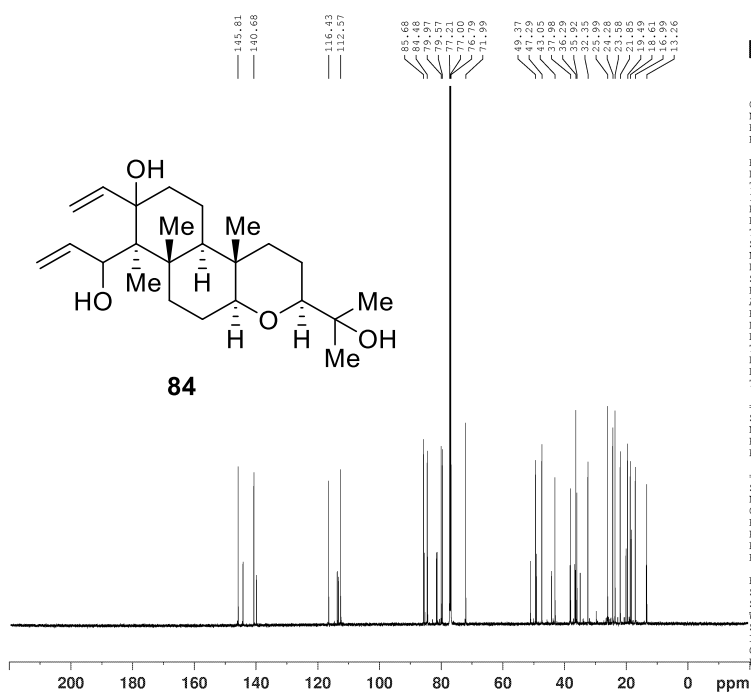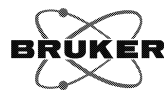

Current Data Parameters  
NAME rjs-0747 Carbon  
EXPNO 1  
PROCNO 1

F2 - Acquisition Parameters  
Date\_ 20150115  
Time 8.25  
INSTRUM spect  
PROBHD 5 mm CPQNP 1H/  
PULPROG zgpg30  
TD 65536  
SOLVENT CDCl3  
NS 51  
DS 4  
SWH 36057.691 Hz  
FIDRES 0.550197 Hz  
AQ 0.9087659 sec  
RG 203  
DW 13.867 usec  
DE 18.00 usec  
TE 298.0 K  
D1 2.00000000 sec  
D11 0.03000000 sec  
TD0 1

===== CHANNEL f1 =====  
SFO1 150.9178981 MHz  
NUC1 13C  
P1 11.00 usec  
PLW1 30.00000000 W

===== CHANNEL f2 =====  
SFO2 600.1324005 MHz  
NUC2 1H  
CPDPRG2 waltz16  
PCPD2 80.00 usec  
PLW2 9.00000000 W  
PLW12 0.26587000 W  
PLW13 0.17016000 W

F2 - Processing parameters  
SI 32768  
SF 150.9028173 MHz  
WDW EM  
SSB 0  
LB 1.00 Hz  
GB 0  
PC 1.40

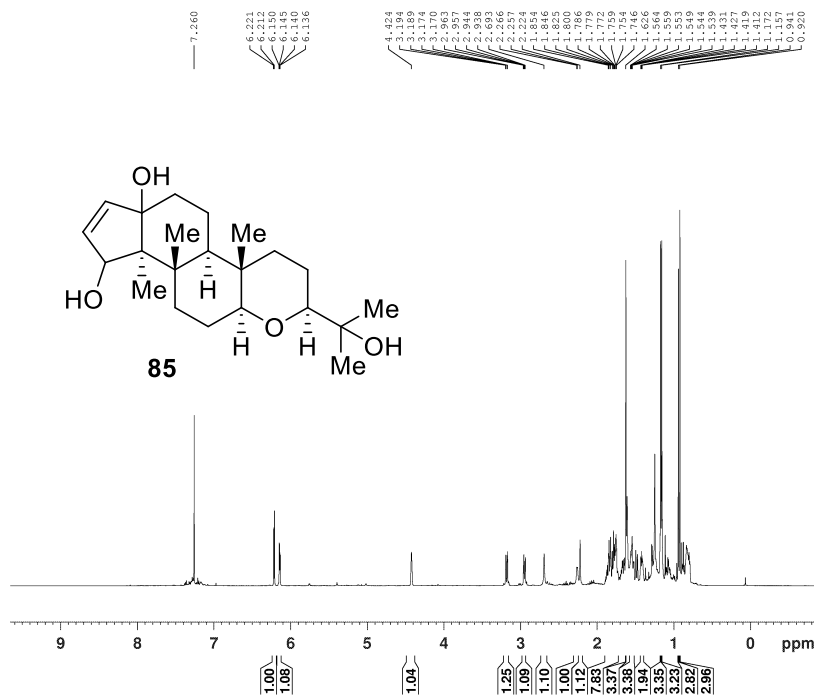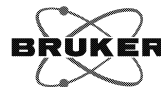

Current Data Parameters  
NAME rjs-0759 proton  
EXPNO 1  
PROCNO 1

F2 - Acquisition Parameter  
Date\_ 20150130  
Time 9.14  
INSTRUM spect  
PROBHD 5 mm CPQNP 1H/  
PULPROG zg30  
TD 65536  
SOLVENT CDCl3  
NS 33  
DS 2  
SWH 12019.230 Hz  
FIDRES 0.183399 Hz  
AQ 2.7262976 se  
RG 64  
DW 41.600 us  
DE 10.00 us  
TE 293.2 K  
D1 1.00000000 se  
TD0 1

==== CHANNEL f1 =====  
SF01 600.1337060 MH  
NUC1 1H  
P1 13.00 us  
PLW1 9.00000000 W

F2 - Processing parameters  
SI 65536  
SF 600.1300166 MH  
WDW EM  
SSB 0  
LB 0.30 Hz  
GB 0  
PC 1.00

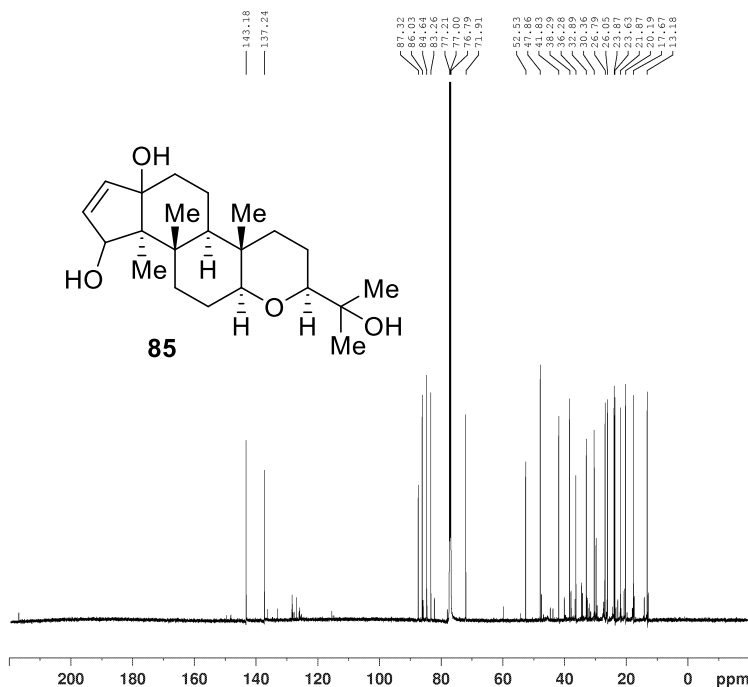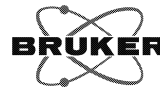

Current Data Parameters  
NAME rjs-0759 Carbon  
EXPNO 1  
PROCNO 1

F2 - Acquisition Parameters  
Date\_ 20150131  
Time 6.27  
INSTRUM spect  
PROBHD 5 mm CPQNP 1H/  
PULPROG zgpg30  
TD 65536  
SOLVENT CDCl3  
NS 1774  
DS 4  
SWH 36057.691 Hz  
FIDRES 0.550197 Hz  
AQ 0.9087659 sec  
RG 203  
DW 13.867 usec  
DE 18.00 usec  
TE 298.0 K  
D1 2.00000000 sec  
D11 0.03000000 sec  
TD0 1

==== CHANNEL f1 =====  
SF01 150.9178981 MHz  
NUC1 13C  
P1 11.00 usec  
PLW1 30.00000000 W

==== CHANNEL f2 =====  
SF02 600.1324005 MHz  
NUC2 1H  
CPDPRG2 waltz16  
PCPD2 80.00 usec  
PLW2 9.00000000 W  
PLW12 0.26587000 W  
PLW13 0.17016000 W

F2 - Processing parameters  
SI 32768  
SF 150.9028129 MHz  
WDW EM  
SSB 0  
LB 1.00 Hz  
GB 0  
PC 1.40

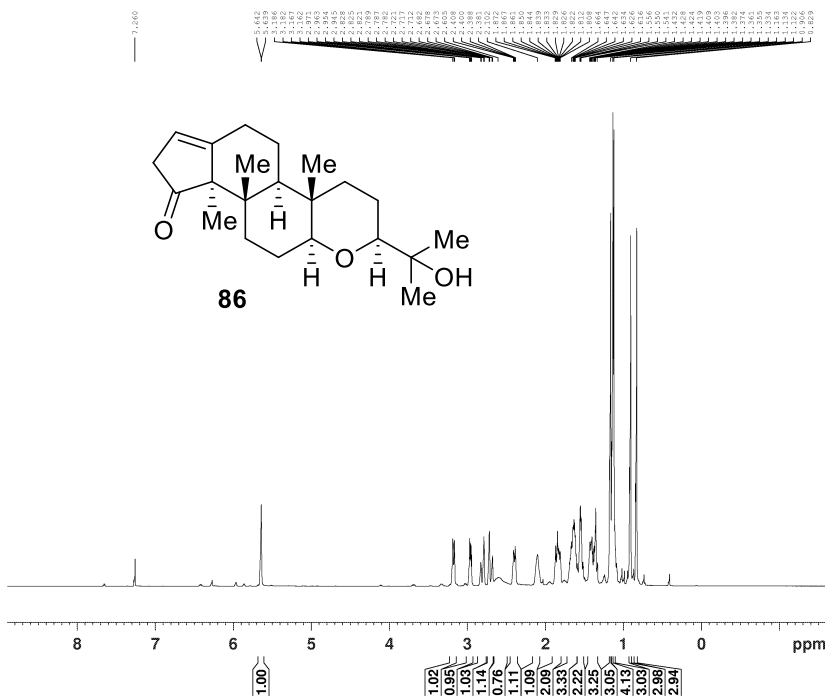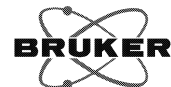

Current Data Parameters  
 NAME rjs-1215 Pure  
 EXPNO 1  
 PROCNO 1

F2 - Acquisition Parameter  
 Date\_ 20150314  
 Time 6.15  
 INSTRUM spect  
 PROBHD 5 mm CPQNP 1H/  
 PULPROG zg30  
 TD 65536  
 SOLVENT CDCl3  
 NS 20  
 DS 2  
 SWH 12019.230 Hz  
 FIDRES 0.183399 Hz  
 AQ 2.7262976 se  
 RG 25.4  
 DW 41.600 us  
 DE 10.00 us  
 TE 298.1 K  
 D1 1.00000000 se  
 TD0 1

==== CHANNEL f1 =====  
 SF01 600.1337060 MH  
 NUC1 1H  
 P1 13.00 us  
 PLW1 9.00000000 W

F2 - Processing parameters  
 SI 65536  
 SF 600.1300172 MH  
 WDW EM  
 SSB 0  
 LB 0.30 Hz  
 GB 0  
 PC 1.00

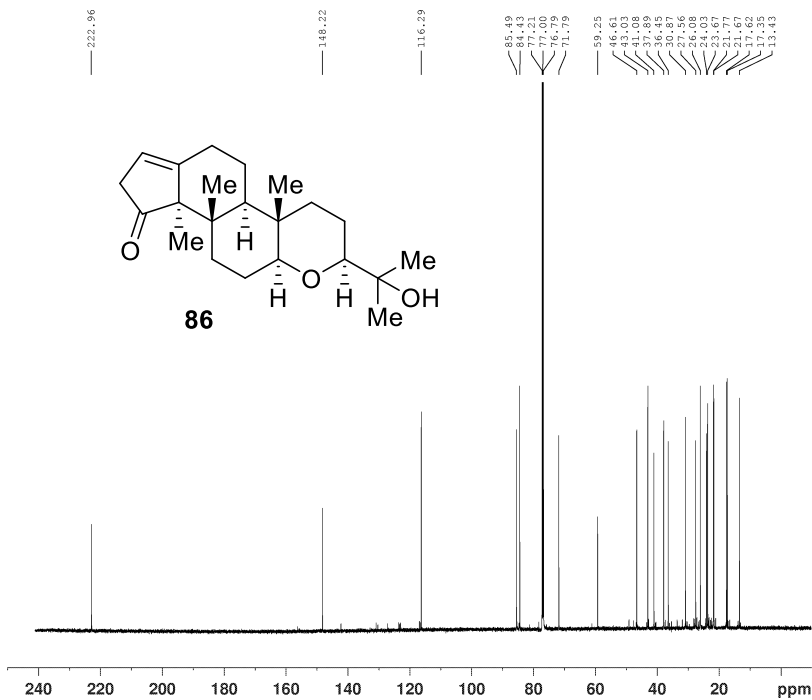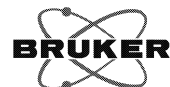

Current Data Parameters  
 NAME rjs-1215 Pure Carbon  
 EXPNO 1  
 PROCNO 1

F2 - Acquisition Parameters  
 Date\_ 20150314  
 Time 6.20  
 INSTRUM spect  
 PROBHD 5 mm CPQNP 1H/  
 PULPROG zgpg30  
 TD 65536  
 SOLVENT CDCl3  
 NS 59  
 DS 4  
 SWH 42613.637 Hz  
 FIDRES 0.650232 Hz  
 AQ 0.7689557 sec  
 RG 203  
 DW 11.733 usec  
 DE 18.00 usec  
 TE 298.1 K  
 D1 2.00000000 sec  
 D11 0.03000000 sec  
 TD0 1

==== CHANNEL f1 =====  
 SF01 150.9178981 MHZ  
 NUC1 13C  
 P1 11.00 usec  
 PLW1 30.00000000 W

==== CHANNEL f2 =====  
 SF02 600.1324005 MHZ  
 NUC2 1H  
 CPDPRG[2] waltz16  
 PCPD2 80.00 usec  
 PLW2 9.00000000 W  
 PLW12 0.26587000 W  
 PLW13 0.17016000 W

F2 - Processing parameters  
 SI 32768  
 SF 150.9028167 MHZ  
 WDW EM  
 SSB 0  
 LB 1.00 Hz  
 GB 0  
 PC 1.40



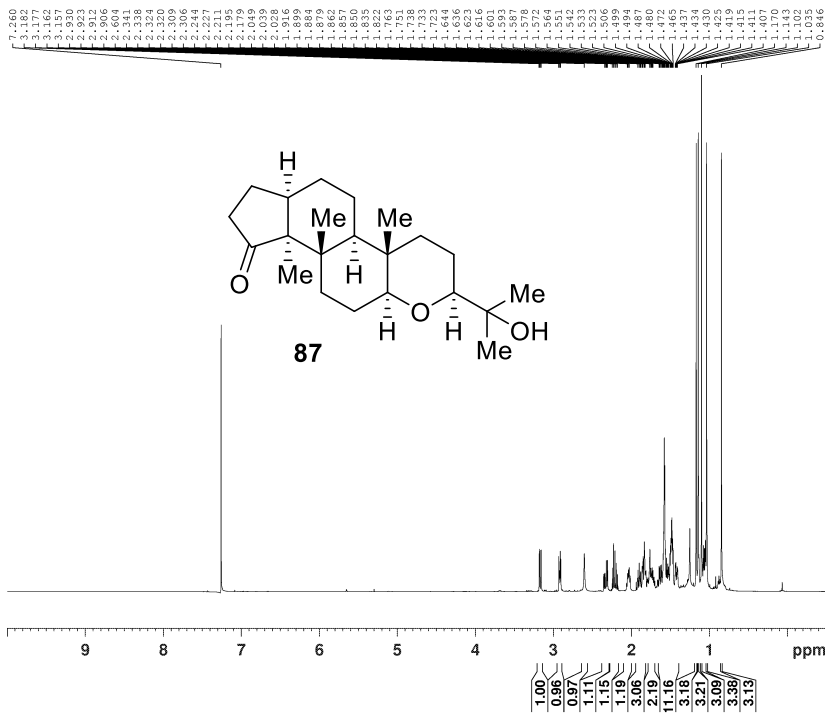

**BRUKER**

Current Data Parameters  
 NAME rjs-1219  
 EXPNO 1  
 PROCNO 1

F2 - Acquisition Parameter  
 Date\_ 20150317  
 Time 12.46  
 INSTRUM spect  
 PROBHD 5 mm CPQNP 1H/  
 PULPROG zg30  
 TD 65536  
 SOLVENT CDCl3  
 NS 16  
 DS 2  
 SWH 12019.230 Hz  
 FIDRES 0.183399 Hz  
 AQ 2.7262976 se  
 RG 71.8  
 DW 41.600 us  
 DE 10.00 us  
 TE 298.1 K  
 D1 1.00000000 se  
 TD0 1

==== CHANNEL f1 =====  
 SF01 600.1337060 MHz  
 NUC1 1H  
 P1 13.00 us  
 PLW1 9.00000000 W

F2 - Processing parameters  
 SI 65536  
 SF 600.1300181 MHz  
 SE EM  
 WDW 0  
 LB 0.30 Hz  
 GB 0  
 PC 1.00

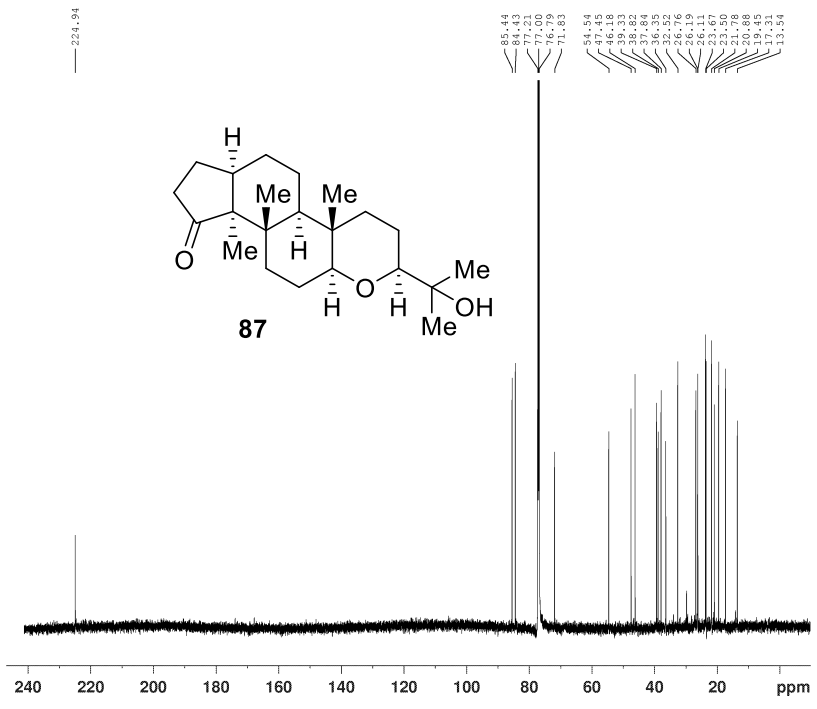

**BRUKER**

Current Data Parameters  
 NAME rjs-1219 Pure Carbon  
 EXPNO 1  
 PROCNO 1

F2 - Acquisition Parameters  
 Date\_ 20150318  
 Time 6.36  
 INSTRUM spect  
 PROBHD 5 mm CPQNP 1H/  
 PULPROG zgpg30  
 TD 65536  
 SOLVENT CDCl3  
 NS 447  
 DS 4  
 SWH 42613.637 Hz  
 FIDRES 0.650232 Hz  
 AQ 0.7689557 sec  
 RG 203  
 DW 11.733 usec  
 DE 18.00 usec  
 TE 298.1 K  
 D1 2.00000000 sec  
 D11 0.03000000 sec  
 TD0 1

==== CHANNEL f1 =====  
 SF01 150.9178981 MHz  
 NUC1 13C  
 P1 11.00 usec  
 PLW1 30.00000000 W

==== CHANNEL f2 =====  
 SF02 600.1324005 MHz  
 NUC2 1H  
 CPDPRG[2] waltz16  
 PCPD2 80.00 usec  
 PLW2 9.00000000 W  
 PLW12 0.26587000 W  
 PLW13 0.17016000 W

F2 - Processing parameters  
 SI 32768  
 SF 150.9028135 MHz  
 SE EM  
 WDW 0  
 LB 1.00 Hz  
 GB 0  
 PC 1.40

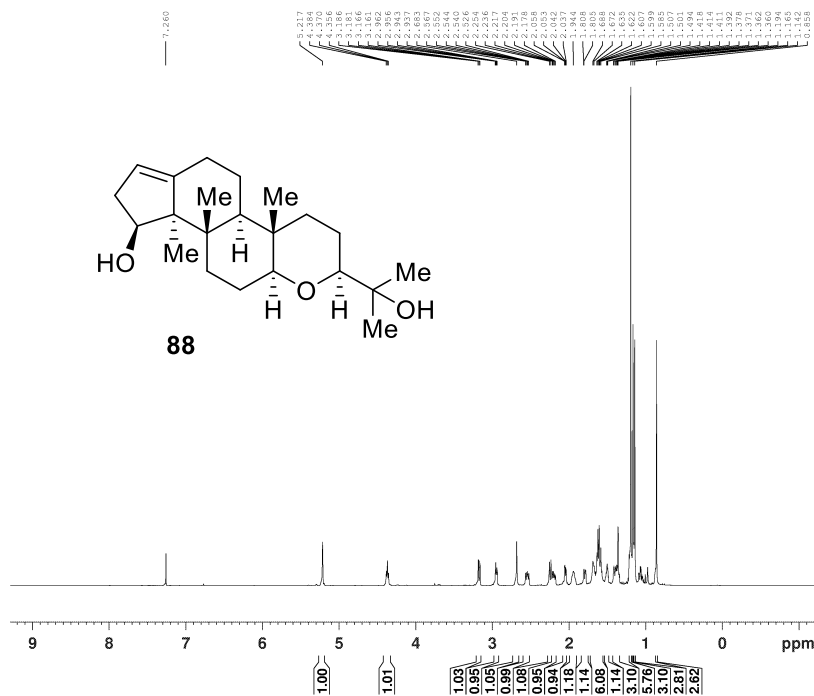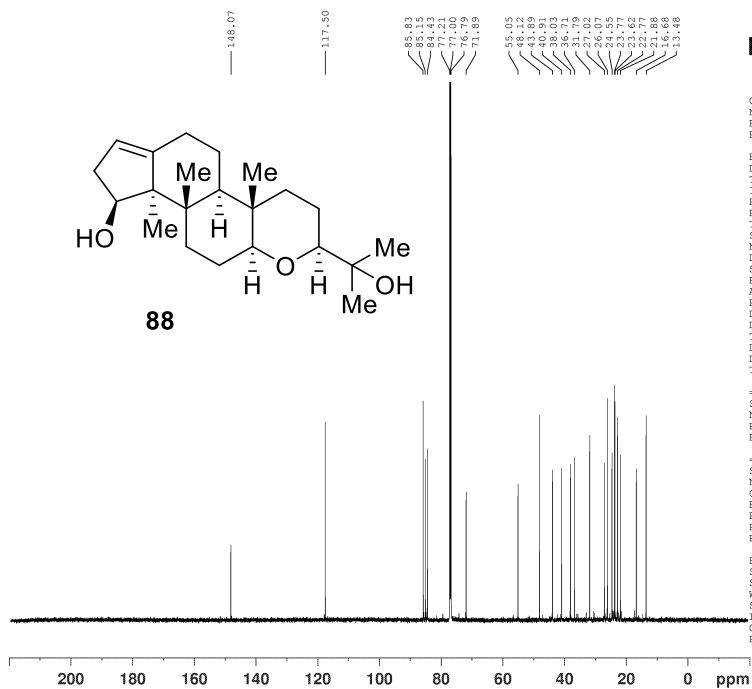

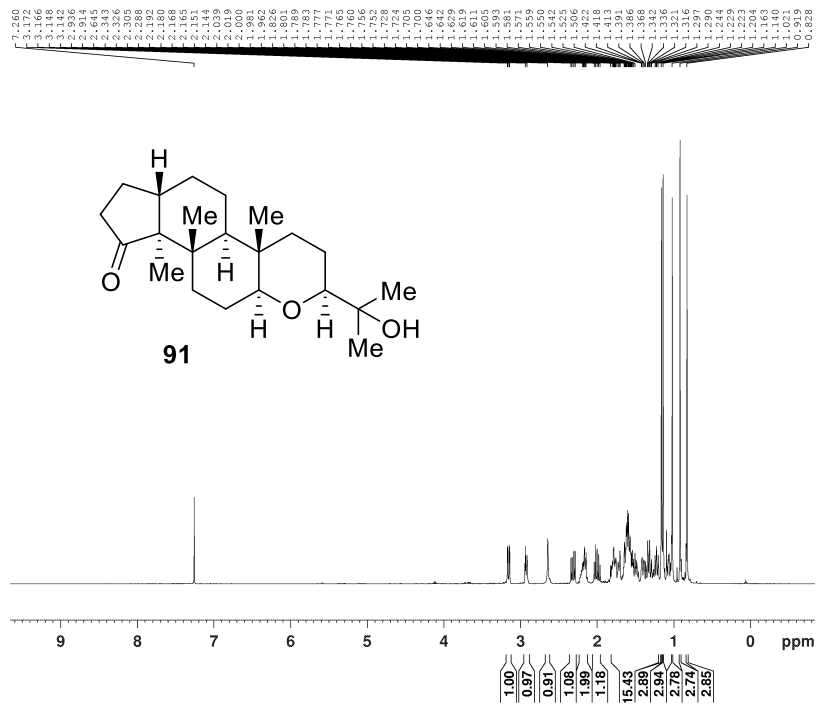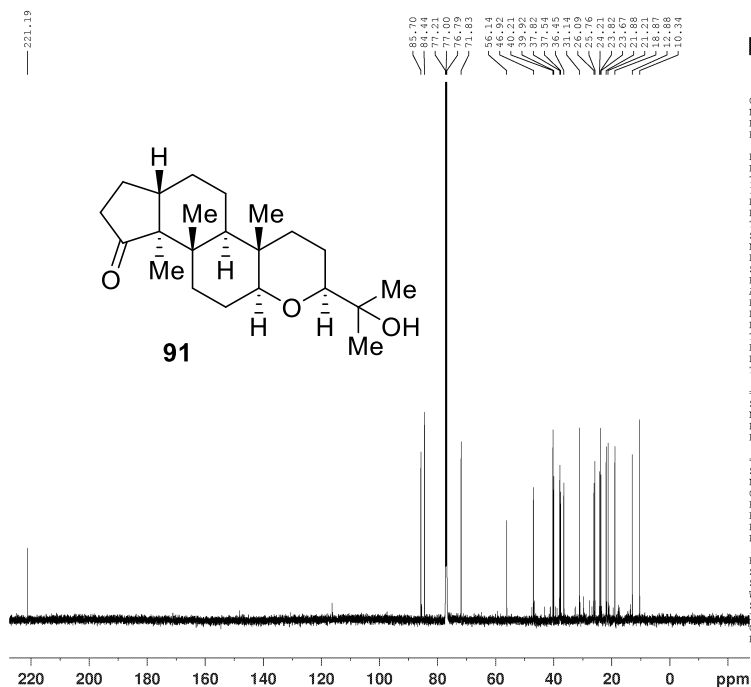

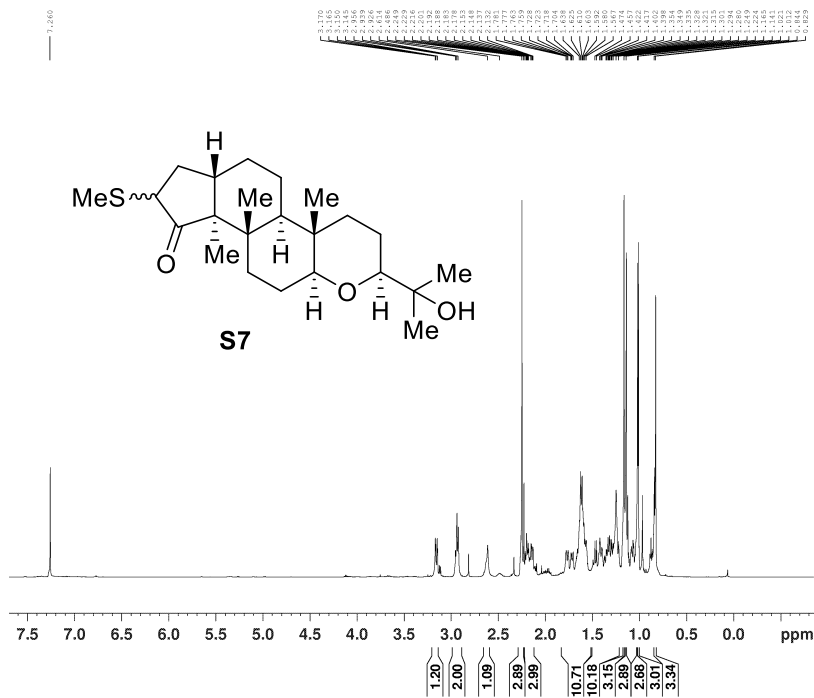

Current Data Parameters  
NAME rjs-2458 Pure prot  
EXPNO 1  
PROCNO 1

F2 - Acquisition Parameters  
Date\_ 20150219  
Time 17.14  
INSTRUM spect  
PROBHD 5 mm CPQNP 1H/  
PULPROG zg30  
TD 65536  
SOLVENT CDCl3  
NS 20  
DS 2  
SMH 12019.230 Hz  
FIDRES 0.183399 Hz  
AQ 2.7262976 sec  
RG 32  
DW 41.600 usec  
DE 10.00 usec  
TE 298.1 K  
D1 1.00000000 sec  
TD0 1

===== CHANNEL f1 =====  
SF01 600.1337060 MHz  
NUC1 1H  
P1 13.00 usec  
PLW1 9.00000000 w  
F2 - Processing parameters  
SI 65536  
SF 600.1300149 MHz  
WDW EM  
SSB 0  
LB 0.30 Hz  
GB 0  
PC 1.00

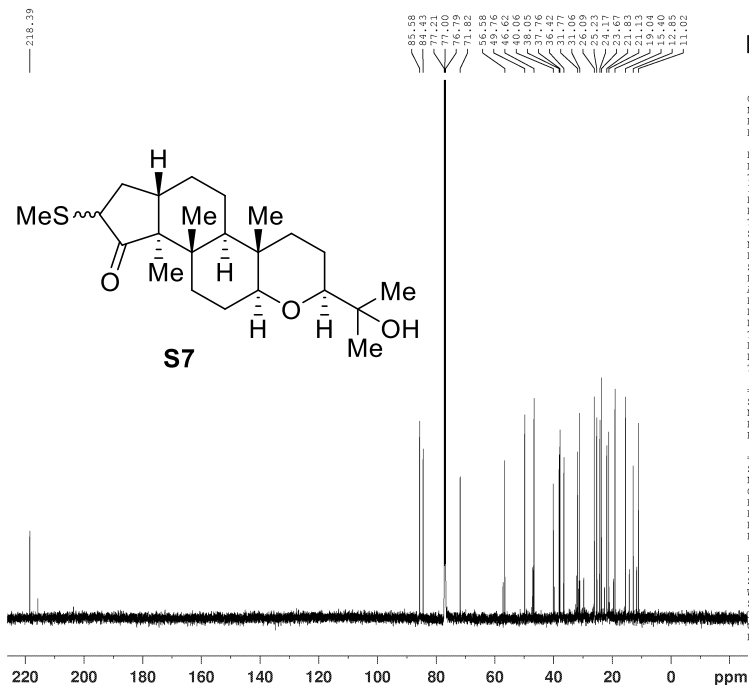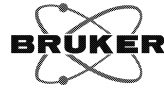

Current Data Parameters  
NAME rjs-2458 Pure Carbon  
EXPNO 1  
PROCNO 1

F2 - Acquisition Parameters  
Date\_ 20150219  
Time 17.18  
INSTRUM spect  
PROBHD 5 mm CPQNP 1H/  
PULPROG zgpg30  
TD 65536  
SOLVENT CDCl3  
NS 73  
DS 4  
SMH 42613.637 Hz  
FIDRES 0.650232 Hz  
AQ 0.768957 sec  
RG 203  
DW 11.733 usec  
DE 18.00 usec  
TE 298.2 K  
D1 2.00000000 sec  
D11 0.03000000 sec  
TD0 1

===== CHANNEL f1 =====  
SF01 150.9178981 MHz  
NUC1 13C  
P1 11.00 usec  
PLW1 30.00000000 w  
===== CHANNEL f2 =====  
SF02 600.1324005 MHz  
NUC2 1H  
CPDPRG12 waltz16  
PCPD2 80.00 usec  
PLW2 9.00000000 w  
PLW12 0.26587000 w  
PLW13 0.17016000 w

F2 - Processing parameters  
SI 32768  
SF 150.9028155 MHz  
WDW EM  
SSB 0  
LB 1.00 Hz  
GB 0  
PC 1.40

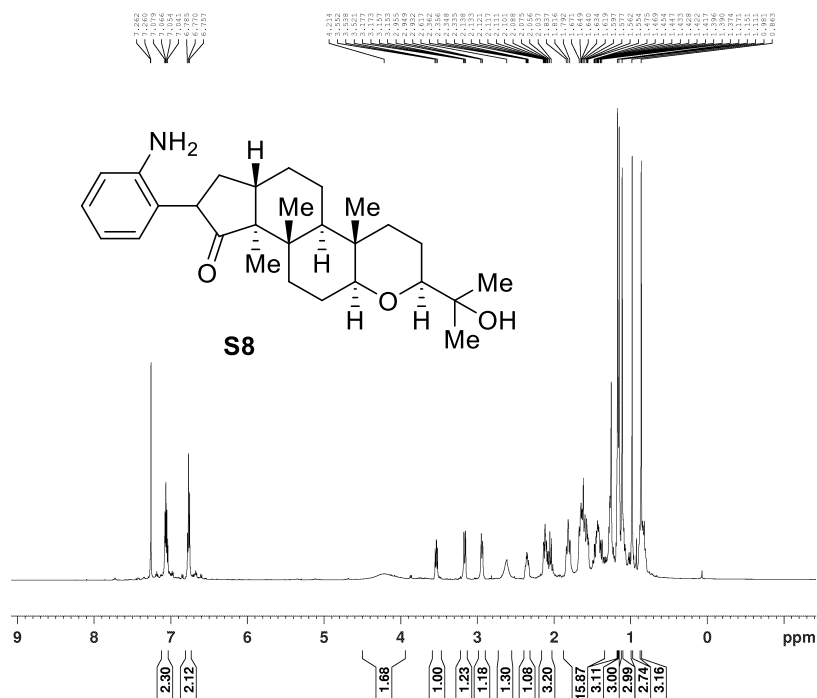

Current Data Parameters  
 NAME rjs-2463 Pure Prot  
 EXPNO 1  
 PROCNO 1

F2 - Acquisition Parameters  
 Date\_ 20150221  
 Time 11.30  
 INSTRUM spect  
 PROBHD 5 mm CPQNP 1H/  
 PULPROG zg30  
 TD 65536  
 SOLVENT CDCl3  
 NS 36  
 DS 2  
 SWH 12019.230 Hz  
 FIDRES 0.183399 Hz  
 AQ 2.7262976 sec  
 RG 57  
 DW 41.600 usec  
 DE 10.00 usec  
 TE 298.1 K  
 D1 1.0000000 sec  
 TDO 1

----- CHANNEL f1 -----  
 SF01 600.1337060 MHz  
 NUC1 1H  
 P1 13.00 usec  
 PLW1 9.00000000 w  
 F2 - Processing parameters  
 SI 65536  
 SF 600.1300148 MHz  
 WDW EM  
 SSB 0  
 LB 0.30 Hz  
 GB 0  
 PC 1.00

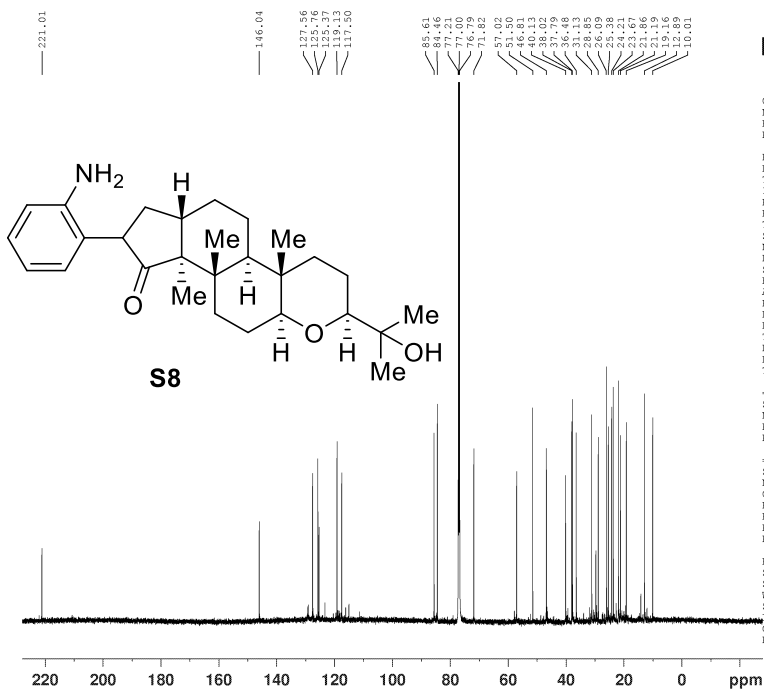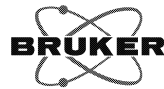

Current Data Parameters  
 NAME rjs-2463 Pure carbon  
 EXPNO 1  
 PROCNO 1

F2 - Acquisition Parameters  
 Date\_ 20150221  
 Time 11.34  
 INSTRUM spect  
 PROBHD 5 mm CPQNP 1H/  
 PULPROG zgpg30  
 TD 65536  
 SOLVENT CDCl3  
 NS 760  
 DS 4  
 SWH 42613.637 Hz  
 FIDRES 0.650232 Hz  
 AQ 0.7689557 sec  
 RG 203  
 DW 11.733 usec  
 DE 18.00 usec  
 TE 298.2 K  
 D1 2.0000000 sec  
 D11 0.03000000 sec  
 TDO 1

----- CHANNEL f1 -----  
 SF01 150.9178981 MHz  
 NUC1 13C  
 P1 11.00 usec  
 PLW1 30.00000000 w  
 ----- CHANNEL f2 -----  
 SF02 600.1324005 MHz  
 NUC2 1H  
 CPDPRG2 waltz16  
 PCPD2 80.00 usec  
 PLW2 9.00000000 w  
 PLW12 0.26587000 w  
 PLW13 0.17016000 w

F2 - Processing parameters  
 SI 32768  
 SF 150.9028135 MHz  
 WDW EM  
 SSB 0  
 LB 1.00 Hz  
 GB 0  
 PC 1.40

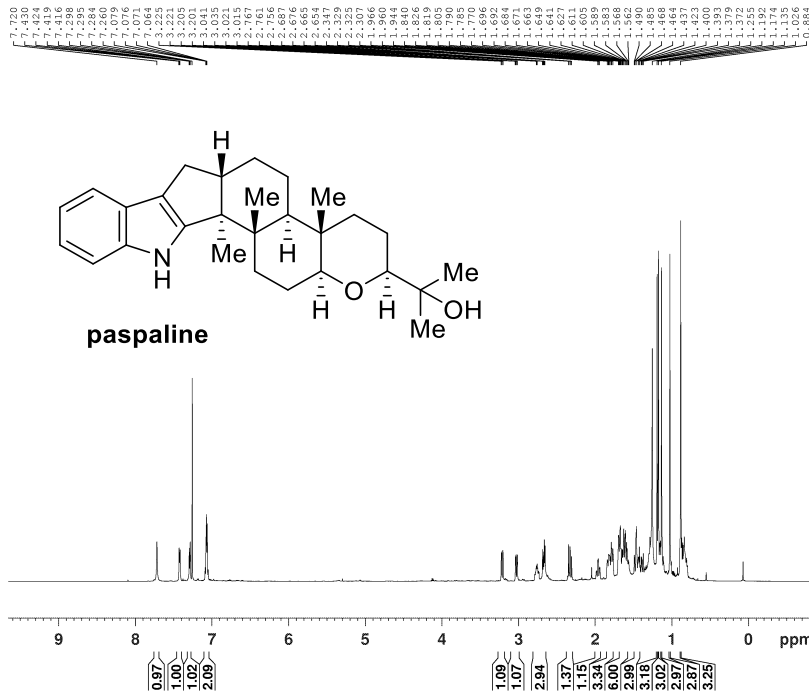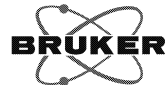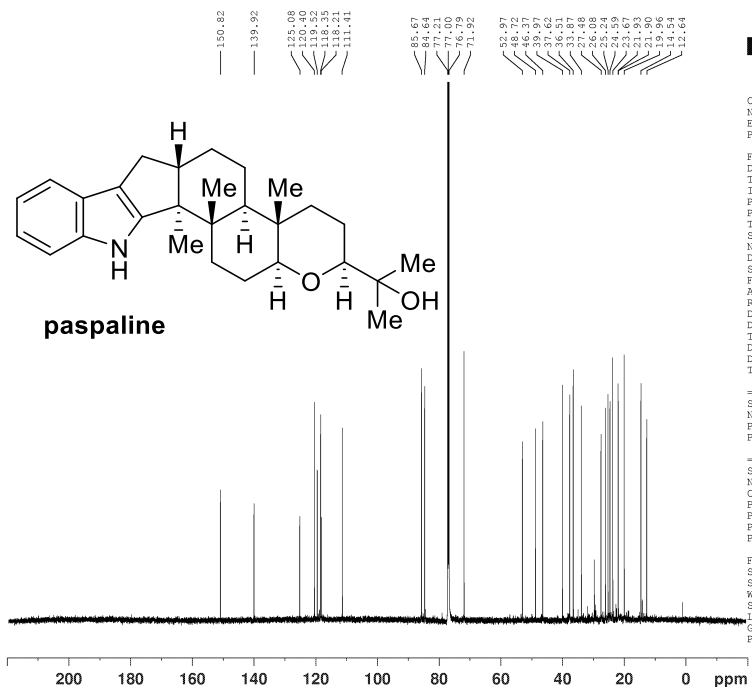

Supplement: NIHMS725716-supplement-supporting_information.pdf [file NIHMS725716-supplement-supporting_information.pdf]
